# Supplementary material for: Cost-effectiveness of home versus hospital management of children at onset of type 1 diabetes: the DECIDE randomised controlled trial
Source: PubMed Central journal article supplement — BMJ Open. 2021 May 19;11(5):e043523. doi: 10.1136/bmjopen-2020-043523 (PMC8137197; doi:10.1136/bmjopen-2020-043523), 2021-05-19
Supplement: bmjopen-2020-043523.draft_revisions.pdf [file bmjopen-2020-043523.draft_revisions.pdf]

# BMJ Open

BMJ Open is committed to open peer review. As part of this commitment we make the peer review history of every article we publish publicly available.

When an article is published we post the peer reviewers' comments and the authors' responses online. We also post the versions of the paper that were used during peer review. These are the versions that the peer review comments apply to.

The versions of the paper that follow are the versions that were submitted during the peer review process. They are not the versions of record or the final published versions. They should not be cited or distributed as the published version of this manuscript.

BMJ Open is an open access journal and the full, final, typeset and author-corrected version of record of the manuscript is available on our site with no access controls, subscription charges or pay-per-view fees (<http://bmjopen.bmj.com>).

If you have any questions on BMJ Open's open peer review process please email [info.bmjopen@bmj.com](mailto:info.bmjopen@bmj.com)

# BMJ Open

## Cost-effectiveness of home versus hospital management of children at onset of Type 1 Diabetes: The DECIDE randomised controlled trial

|                               |                                                                                                                                                                                                                                                                                                                                                                                                                                                                                                        |
|-------------------------------|--------------------------------------------------------------------------------------------------------------------------------------------------------------------------------------------------------------------------------------------------------------------------------------------------------------------------------------------------------------------------------------------------------------------------------------------------------------------------------------------------------|
| Journal:                      | <i>BMJ Open</i>                                                                                                                                                                                                                                                                                                                                                                                                                                                                                        |
| Manuscript ID                 | bmjopen-2020-043523                                                                                                                                                                                                                                                                                                                                                                                                                                                                                    |
| Article Type:                 | Original research                                                                                                                                                                                                                                                                                                                                                                                                                                                                                      |
| Date Submitted by the Author: | 06-Aug-2020                                                                                                                                                                                                                                                                                                                                                                                                                                                                                            |
| Complete List of Authors:     | McCarroll, Zoe; Cardiff University, School of Medicine<br>Townson, J; Cardiff University, Centre for Trials Research<br>Pickles, Timothy; Cardiff University, Centre for Trials Research<br>Gregory, John; Cardiff University School of Medicine, School of Medicine<br>Playle, Rebecca; Cardiff University, Centre for Trials Research<br>Robling, Michael; Cardiff University, Centre for Trials Research<br>Hughes, Dyfrig; Bangor University, Centre for Health Economics and Medicines Evaluation |
| Keywords:                     | HEALTH ECONOMICS, DIABETES & ENDOCRINOLOGY, Paediatric endocrinology < DIABETES & ENDOCRINOLOGY                                                                                                                                                                                                                                                                                                                                                                                                        |
|                               |                                                                                                                                                                                                                                                                                                                                                                                                                                                                                                        |

SCHOLARONE™  
Manuscripts

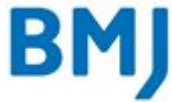

I, the Submitting Author has the right to grant and does grant on behalf of all authors of the Work (as defined in the below author licence), an exclusive licence and/or a non-exclusive licence for contributions from authors who are: i) UK Crown employees; ii) where BMJ has agreed a CC-BY licence shall apply, and/or iii) in accordance with the terms applicable for US Federal Government officers or employees acting as part of their official duties; on a worldwide, perpetual, irrevocable, royalty-free basis to BMJ Publishing Group Ltd ("BMJ") its licensees and where the relevant Journal is co-owned by BMJ to the co-owners of the Journal, to publish the Work in this journal and any other BMJ products and to exploit all rights, as set out in our [licence](#).

The Submitting Author accepts and understands that any supply made under these terms is made by BMJ to the Submitting Author unless you are acting as an employee on behalf of your employer or a postgraduate student of an affiliated institution which is paying any applicable article publishing charge ("APC") for Open Access articles. Where the Submitting Author wishes to make the Work available on an Open Access basis (and intends to pay the relevant APC), the terms of reuse of such Open Access shall be governed by a Creative Commons licence – details of these licences and which [Creative Commons](#) licence will apply to this Work are set out in our licence referred to above.

Other than as permitted in any relevant BMJ Author's Self Archiving Policies, I confirm this Work has not been accepted for publication elsewhere, is not being considered for publication elsewhere and does not duplicate material already published. I confirm all authors consent to publication of this Work and authorise the granting of this licence.

**Title:** Cost-effectiveness of home versus hospital management of children at onset of Type 1 Diabetes: The DECIDE randomised controlled trial

**Authors:** Zoe McCarroll<sup>1</sup>, Julia Townson<sup>2</sup>, Tim Pickles<sup>3</sup>, John W Gregory<sup>4</sup>, Rebecca Playle<sup>5</sup>, Mike Robling<sup>6</sup>, Dyfrig Hughes<sup>7</sup>

\*Corresponding Author:

<sup>2</sup>Dr Julia Townson,  
Senior Research Fellow,  
Centre for Trials Research,  
College of Biomedical & Life Sciences,  
Cardiff University,  
4<sup>th</sup> Floor Neuadd Meirionnydd,  
Heath Park,  
Cardiff,  
CF14 4YS.

Email: [townson@cardiff.ac.uk](mailto:townson@cardiff.ac.uk)

<sup>1</sup>Zoe McCarroll, School of Medicine, Cardiff University, Heath Park, Cardiff, CF14 4XN.

<sup>3</sup>Tim Pickles, Research Associate in Statistics, Centre for Trials Research, College of Biomedical & Life Sciences, Cardiff University, 4<sup>th</sup> Floor, Neuadd Meirionnydd, Heath Park, Cardiff, CF14 4YS

<sup>4</sup>Professor John W Gregory, Professor in Paediatric Endocrinology, Division of Population Medicine, School of Medicine, Cardiff University, Heath Park, Cardiff, CF14 4XN.

<sup>5</sup>Dr Rebecca Playle, Senior Lecturer in Statistics, Centre for Trials Research, College of Biomedical & Life Sciences, Cardiff University, 4<sup>th</sup> Floor, Neuadd Meirionnydd, Heath Park, Cardiff, CF14 4YS.

<sup>6</sup>Professor Mike Robling, Director of Population Health Trials, Centre for Trial Research, College of Biomedical & Life Sciences, Cardiff University, 7<sup>th</sup> Floor, Neuadd Meirionnydd, Heath Park, Cardiff, CF14 4YS.

<sup>7</sup>Professor Dyfrig A Hughes, Centre for Health Economics and Medicines Evaluation, Bangor University, Bangor, Gwynedd, LL57 2PZ.

**Short running title:** The DECIDE RCT health economics

**Word count manuscript:** 3626

**MeSH key words:** Type 1 diabetes; cost-effectiveness; diagnosis; children; home; initial management

## ABSTRACT

**Objective** The aim of this economic evaluation was to assess whether home management could represent a cost-effective strategy in the patient pathway of Type 1 diabetes (T1D). This is based on the DECIDE trial (ISRCTN78114042), which compared home versus hospital management from diagnosis in childhood diabetes and found no statistically significant difference in glycaemic control at 24 months.

**Design** Cost-effectiveness analysis alongside a randomised controlled trial.

**Setting** Eight paediatric diabetes centres in England, Wales and Northern Ireland.

**Participants** 203 clinically well children aged under 17 years, with newly diagnosed type 1 diabetes and their carers.

**Outcome measures** The base case analysis adopted an NHS perspective. A scenario analysis assessed costs from a broader societal perspective. The incremental cost-effectiveness ratio (ICER) expressed as cost per mmol/mol reduction in HbA1c, was based on the mean difference in costs between the home and hospital groups, divided by mean differences in effectiveness (HbA1c). Uncertainty was considered in terms of the probability of cost-effectiveness.

**Results** At 24 months post-intervention, the base case analysis showed a significant difference in costs between home and hospital, in favour of home management (mean difference -£2,217; 95% CI -£2,825 to -£1,609;  $p < 0.05$ ). Home care dominated, with an ICER of £7,434 (saved) per mmol/mol reduction of HbA1c. The results of the scenario analysis also favoured home management. The greatest driver of cost differences was hospitalisation during the initiation period.

**Conclusions** Home management from diagnosis of children with T1D who are medically stable represents a less costly approach for the NHS in the UK, without impacting clinical effectiveness.

### Strengths and limitations of this study

- Cost-effectiveness analysis based on a randomised controlled trial, using patient-level data on resource use, collected prospectively.
- Methods were consistent with the NICE reference case, as recommended for the NHS in the UK.
- Quality-adjusted life years were not used as the health outcome and therefore interpretation of cost-effectiveness is more challenging.
- Cost-effectiveness was assessed over the trial period only; lifetime extrapolation was not performed to identify long-term costs and benefits.
- Clinical practice has evolved since the trial commenced and consequently resource use and costs will have changed.

**Trial registration number** ISRCTN78114042

## INTRODUCTION

A diagnosis of Type 1 diabetes (T1D) poses a significant economic burden on healthcare systems, due to the resources required for effective management, the associated complications, and its life-long course. As a result, it is estimated that the National Health Service (NHS) spends £1 billion a year on T1D; 11% of this expenditure is on inpatient care.<sup>(1)</sup> The cost of keeping someone in hospital is high and, as a result, there has been a growing emphasis on delivery of care within primary care and community settings.<sup>(2)</sup> Patients' attitudes are also shifting towards wanting to be more involved in their own care and wishing to be treated closer to home, as highlighted in the NHS England Five Year Forward Plan.<sup>(3)</sup> There is evidence that initial management of T1D can be successfully delivered at home rather than in hospital, though the cost-effectiveness of this approach is unknown.<sup>(4-6)</sup>

T1D affects 24.5 per 100,000 children and young people in the United Kingdom (UK) and the incidence is rising.<sup>(7)</sup> It is a life-long condition which can lead to serious short (e.g. diabetic ketoacidosis (DKA)) and long-term (e.g. renal, vascular and retinal damage) complications.<sup>(8)</sup> The risk of complications is reduced if blood glucose is kept within healthy targets.<sup>(9)</sup> To achieve this, the National Institute for Health and Care Excellence (NICE) recommends offering children and their families intensive education on insulin management from diagnosis and a long-term package of care, delivered through a multidisciplinary team. The NICE guidelines state that the choice of where this initial care is delivered should be made based on clinical need, family circumstances and wishes.<sup>(10)</sup> Hospitalisation has been shown to be a substantially stressful event for both the child and their parents and so should be avoided unless clinically necessary.<sup>(11-13)</sup> Most children with T1D are not acutely unwell at diagnosis and therefore could be managed at home.<sup>(14)</sup>

However, there have been few, well-designed studies evaluating home versus hospital management.<sup>(5)</sup> A Cochrane review in 2007 concluded that the results of prior studies were inconclusive but suggested that home management at diagnosis does not lead to any clinical, psychological or cost disadvantages.<sup>(4)</sup> Since this review, further randomised controlled trials (RCTs) have been conducted. One was carried out in Sweden, where home management was described as 'hospital-based-home-care' as it involved staying in a facility which was designed to replicate a home environment but was located in the hospital grounds.<sup>(15)</sup> This was found to be as clinically effective as hospital management, in terms of glycated haemoglobin (HbA1c) (mean difference between groups 0.6 mmol/mol;  $p=0.777$ ) and a cost-effectiveness analysis reported significantly lower healthcare (direct) costs in the home managed group (- SEK 16,212 (-£1,318);  $p<0.05$ ).<sup>(5)</sup>

More recently, the Delivering Early Care In Diabetes Evaluation (DECIDE) RCT evaluated home versus hospital management at diagnosis in childhood diabetes.<sup>(16)</sup> It was conducted between 2008-2013 in eight paediatric diabetes centres in England, Wales and Northern Ireland. Children aged <17 years old with newly diagnosed T1D were randomised to receive either home or hospital management ( $n=203$  in total). Home management of the initiation period from diagnosis was for a minimum of three days and included at least six supervised insulin injections plus delivery of educational care. The primary outcome was HbA1c at 24 months post-

1  
2  
3 diagnosis and secondary outcomes included coping, anxiety, quality of life (QoL) and  
4 use of NHS resources. The trial found no statistically significant difference in HbA1c  
5 between home and hospital management (1.01mmol/mol, 95% CI 0.93 to 1.09) and  
6 there were no differences in secondary outcomes at 24 months, other than a higher  
7 self-esteem in children who were managed at home.  
8  
9

10 The aim of the present analysis was to estimate the cost effectiveness of home  
11 versus hospital management of children diagnosed with T1D from the perspective of  
12 the NHS in the UK.  
13  
14

## 15 **METHODS**

16 The DECIDE trial protocol and results are described in detail elsewhere. (16, 17)  
17 Briefly, DECIDE was a superiority RCT, designed to compare the clinical  
18 effectiveness of home care from diagnosis with hospital-based care in the  
19 management of T1D. The sample size needed to detect a difference in mean HbA1c  
20 of 5 mmol/mol (with an SD of 14 mmol/mol; equivalent to an effect size of 0.4) was  
21 200 participants (100 per group) at a 5% significance level and 80% power.  
22  
23

24 Following informed consent, 203 clinically well children aged less than 17 years old  
25 with newly diagnosed diabetes, from eight paediatric diabetes centres across the  
26 UK, were randomised to home or hospital management. Participants were eligible to  
27 take part if they or their carers were deemed able to complete the study  
28 requirements and gave informed assent or consent. Participants were excluded if  
29 they were not medically stable at diagnosis or required hospitalisation for other  
30 reasons. Full inclusion and exclusion criteria are described in the trial protocol.(17)  
31  
32

### 33 **Trial governance**

34  
35 Multicentre approval was granted by Research Ethics Committee for Wales  
36 (07/MRE09/59). Site-specific approval was granted by participating Acute Trust  
37 Research and Development Departments. The trial sponsor was Cardiff University.  
38

### 39 **Study perspective**

40  
41 The base case analysis of this economic evaluation follows the cost perspective of  
42 the NHS and Personal Social Services (PSS), as recommended by NICE.(18)  
43 Indirect costs (impact on productivity) and direct non-medical costs (incurred by the  
44 patient and his/her carer) were also evaluated through separate scenario analyses  
45 as T1D has been shown to have wider economic impacts.(19)  
46  
47

### 48 **Intervention and comparator**

49  
50 The intervention involved management of the initiation period from diagnosis in the  
51 family's own home, for a minimum of 3 days, to include at least six supervised  
52 injections and delivery of pragmatic educational care. In comparison, participants in  
53 the hospital group were admitted to hospital on the day of diagnosis, for a minimum  
54 of three days and received education and support in line with local practice.  
55  
56

### 57 **Discount rate**

58 A discount rate of 3.5% per annum was applied to costs and consequences after 12  
59 months, as recommended by NICE.(18)  
60

### Estimating resources and costs

Data on resource use were collected using case report forms (CRFs) at baseline, then at 3, 12 and 24 months which were summed to calculate total resource use over 24 months (Supplementary Materials Table 1). Resource use prior to diagnosis was not included.

The base case analysis considered direct NHS and PSS resource use. This encompassed hospital stay, tests and investigations, insulin usage, nurse and dietician travel, and contacts with healthcare professionals.

Contacts with healthcare professionals, along with distance travelled, was collected with each CRF. These were costed using the PSSRU 2019 compendium of NHS unit costs.(20)

All eight centres were contacted for unit costs of a paediatric overnight hospital stay; however, none were able to provide an estimation. Instead, the cost was sourced from the NHS Reference Costs database 2019/20.(21)

Tests and investigations were costed through contacting the Biochemistry and Immunology Department within the University Hospital of Wales, the main centre for the trial. Unit costs not provided were inflated from previously supplied figures from Cwm Taf Health Board to 2019/20 figures, using the CCEMG-EPPI-Centre Cost Converter.(22)

Insulin regimen data were collected at all time points. This included type of insulin, number of units prescribed throughout the day and related equipment usage (at follow-up only). The British National Formulary for Children (BNFc) and the NHS Electronic Drug Tariff were used to reference insulin costs and equipment.(23, 24)

Broader perspectives, considering non-healthcare resource use, were adopted in scenario analyses. These covered productivity losses incurred by the patient and their family (indirect costs), including days off school and work, as well as travel and out of pocket expenses (direct costs) related to managing T1D. Days taken off work were costed based on average salary earnings in the UK.(25) Time taken off school was costed based on calculating an average cost spent per pupil per day, based on the Annual Report on Education Spending in England.(26) Reported out of pocket expenses incurred by patients and their carers were inflated to 2019/20 costs using the UK Consumer Price Index.(27)

### Currency and cost year

Costs were reported in British pounds sterling for 2019/20.

### Choice of model

The results of the main DECIDE trial demonstrated no statistically significant clinical difference between home and hospital groups and therefore it was deemed that an evaluation of lifetime costs using an economic model was neither necessary nor informative.

### Assumptions

The CRFs did not collect data on length of consultations with healthcare professionals and so assumptions were made based on PSSRU data and through communication with healthcare professionals. Further assumptions relating to the



1  
2  
3 calculation and estimation of costs are reported in Supplementary Materials Tables  
4 2-7.  
5

### 6 **Outcome measures and economic analysis**

7 The primary measure of clinical effectiveness was HbA1c at 24 months. As  
8 alternative measures to enable the calculation of quality-adjusted life years (QALYs)  
9 were not used in DECIDE, HbA1c was used as the measure of effect for the cost-  
10 effectiveness analysis.  
11

12  
13 The mean total costs of each scenario were calculated for both the intervention and  
14 control groups over 24 months. This follow-up period was chosen as it was expected  
15 that most participants would have no significant endogenous insulin secretion by this  
16 time point. Costs are also reported for the initiation period (0-3 days).  
17

18 Cost-effectiveness was assessed through estimation of the incremental cost per unit  
19 change in HbA1c (mmol/mol). This is based on the difference in mean total cost per  
20 patient between the intervention and control group (home and hospital  
21 management), divided by the difference in mean HbA1c. The resulting incremental  
22 cost-effectiveness ratio (ICER) was compared with reference to what the NHS is  
23 willing to pay (WTP) for an additional unit change in HbA1c; this being inferred from  
24 existing interventions in diabetes.  
25

26  
27 A cost consequences analysis (CCA) was conducted, in which the costs and  
28 outcomes are presented in a tabular format to support decision makers and allow  
29 them to attach their own weighting to each result. These outcomes include measures  
30 of physical, psychological and social consequences based on parent answers about  
31 their child.  
32

### 33 **Analytical methods**

34  
35 Data collected were inputted into IBM SPSS Version 25 for analysis.(28) The data  
36 were assessed for accuracy and missing data. Any outliers identified were checked  
37 against the original CRF and then investigated through a sensitivity analysis. An  
38 analysis of randomness was carried out on missing data to compare against  
39 patients' socio-demographic data.(29)  
40

41  
42 Uncertainty in the cost-effectiveness ratio was considered by use of non-parametric  
43 bootstrapping using Stata.(30) This involved sampling (with replacement) pairs of  
44 mean cost and HbA1c 10,000 times as a means of estimating the sampling  
45 distribution.(31) Regression analyses were conducted to adjust total costs (by arm  
46 and centre) and 24 month HbA1c (on arm, centre and baseline HbA1c). This  
47 produced 95% confidence intervals for each cost variable and the differences in both  
48 costs and effect for calculating the ICER. This was done for direct healthcare costs  
49 with and without patient or carer borne costs. Microsoft Excel was then used to  
50 bootstrap HbA1c and total direct healthcare costs at 24 months (1000 replications)  
51 and results are displayed on a cost-effectiveness plane. A cost acceptability curve  
52 was drawn to represent the probability of cost-effectiveness for different values of  
53 WTP.(32) This was repeated for the wider perspective, encompassing direct non-  
54 healthcare costs and indirect productivity losses.  
55  
56

57  
58 A univariate sensitivity analysis was also conducted, adjusting the cost of an  
59 overnight stay in hospital for an alternative value, to assess the impact on the ICER.  
60

**Reporting**

The economic analysis of DECIDE is reported in accordance with the Consolidated Health Economic Evaluation Reporting Standards (CHEERS).(33)

For peer review only

## RESULTS

### Sample

Of the 203 children involved in the trial, one participant dropped out within the first few days, eight were missing a 24-month HbA1c measurement and one patient did not have a baseline HbA1c. Therefore, the primary analysis of the clinical data reported results on the remaining 193 participants. To ensure consistency and allow for calculation of the ICER, the same participants were included in the economic analysis.

### Healthcare outcomes

The DECIDE trial found no significant difference in HbA1c at 24 months between home and hospital management (72.1mmol/mol and 72.6mmol/mol;  $p=0.863$ , respectively). This was not affected by repeated measures or sensitivity analyses. Baseline characteristics were explored and both groups were considered to have reasonable similarities.<sup>(16)</sup>

### Direct healthcare resource use and costs

Over 24 months, home management was less costly than hospital management (-£2,217.38; 95% CI -£2,825.38 to -£1,609.38;  $p<0.05$ ) (Table 1). The greatest difference in direct NHS costs, in favour of home management, was seen during days 0-3 (-£2,222.58; 95% CI -£2,373.35 to -£2,071.81;  $p<0.05$ ). During this time, participants in the home management group had fewer contacts with consultants and junior doctors but more non face-to-face interactions with nurses (i.e. telephone calls and email correspondence) (Table 2). Overall, this led to costs during days 0-3 of £974.20 per child for home management and £720.09 for hospital management, in terms of contacts with the Diabetes Team (mean difference in cost of £254.11; 95% CI £147.22 to £361.00;  $p<0.05$ ). The cost of nurse travel was also significantly higher for home management (mean difference £114.69; 95% CI £86.30 to £143.07;  $p<0.05$ ). However, this increased expense was outweighed by the cost of the hospital stay in the first three days for those in the hospital group (£2,582.87; 95% CI £2,464.15 to £2,701.59 per child). This had the greatest contribution to the total direct healthcare costs.

### Non-healthcare resource use and costs

There were no significant differences between home or hospital in either the number of days off school or work during the initiation period (0-3 days) (Table 2); and this remained similar between groups over the 24-month follow-up period. Home management was not found to be significantly less costly than hospital management for patients and their carers at 0-3 days (-£20.96; 95% CI -£100.82 to £58.90;  $p=0.607$ ) or 24 months (£338.45; 95% CI -£962.89 to £285.99;  $p=0.288$ ) (Table 1).

### Healthcare and non-healthcare costs

Overall, home management was significantly less costly than hospital management for the base case analysis (-£2217.38; 95% CI -£2,825.38 to -£1,609.38,  $p<0.05$ ). The difference in costs to the patient and their carers between home and hospital management was not statistically significant. However, adopting a wider perspective which encompasses direct NHS costs and patient/carer borne costs, led to home management being significantly less costly (-£2,555.83; 95% CI -£3,493.72 to -

1  
2  
3 £1,617.93;  $p < 0.05$ ) (Table 3). Full costs, confidence intervals and significance levels  
4 for all resource use data collected are presented in Supplementary Materials Table  
5 8-13.  
6  
7  
8  
9  
10  
11  
12  
13  
14  
15  
16  
17  
18  
19  
20  
21  
22  
23  
24  
25  
26  
27  
28  
29  
30  
31  
32  
33  
34  
35  
36  
37  
38  
39  
40  
41  
42  
43  
44  
45  
46  
47  
48  
49  
50  
51  
52  
53  
54  
55  
56  
57  
58  
59  
60

For peer review only

Table 1 Costs relating to resource use

|                                 |                                          | Home management (n=98),<br>mean (95% CI) (£) | Hospital management (n=95),<br>mean (95% CI) (£) | Difference between Home and<br>Hospital, mean (95% CI) (£) |
|---------------------------------|------------------------------------------|----------------------------------------------|--------------------------------------------------|------------------------------------------------------------|
| <b>DIRECT HEALTHCARE COSTS</b>  |                                          |                                              |                                                  |                                                            |
| <b>Days 0-3</b>                 | Contact with diabetes team               | 974.20 (889.49 to 1058.91)                   | 720.09 (658.01 to 782.17)                        | 254.11 (147.22 to 361.00)                                  |
|                                 | Other Health Professionals               | 0.07 (-0.07 to 0.21)                         | 1.48 (-0.80 to 3.77)                             | -1.41 (-3.67 to 0.84)                                      |
|                                 | Tests and Investigations                 | 54.93 (49.07 to 60.80)                       | 61.74 (56.11 to 67.37)                           | -6.81 (-14.98 to 1.36)                                     |
|                                 | Hospital stay                            | 0.00                                         | 2582.87 (2464.15 to 2701.59)                     | -2582.87 (-2702.48 to -2463.27)                            |
|                                 | Nurse travel                             | 132.69 (106.65 to 158.72)                    | 18.00 (7.63 to 28.37)                            | 114.69 (86.30 to 143.07)                                   |
|                                 | Dietician travel                         | 3.06 (1.25 to 4.88)                          | 0.67 (-0.63 to 1.97)                             | 2.40 (0.14 to 4.66)                                        |
|                                 | Total cost days 0-3                      | 1163.43 (1078.55 to 1248.32)                 | 3386.01 (3260.81 to 3511.21)                     | -2222.58 (-2373.35 to -2071.81)                            |
| <b>Follow-up<br/>(24months)</b> | Contact with the diabetes team           | 1984.28 (1876.30 to 2092.26)                 | 2017.21 (1915.43 to 2118.99)                     | -32.93 (-182.23 to 116.37)                                 |
|                                 | - Outpatient Visits                      | 1399.87 (1344.26 to 1455.48)                 | 1391.98 (1341.24 to 1442.72)                     | 7.89 (-67.44 to 83.22)                                     |
|                                 | - Contact with the diabetes team (other) | 584.41 (501.50 to 667.31)                    | 625.23 (541.03 to 709.42)                        | -40.82 (-160.32 to 78.68)                                  |
|                                 | Hospital contacts                        | 896.90 (568.81 to 1224.99)                   | 859.96 (553.20 to 1166.73)                       | 36.94 (-413.15 to 487.02)                                  |
|                                 | Tests and Investigations                 | 8.15 (5.48 to 10.82)                         | 8.23 (5.65 to 10.80)                             | -0.76 (-3.76 to 3.61)                                      |
|                                 | Total Insulin                            | 457.21 (402.00 to 512.42)                    | 446.15 (397.17 to 495.13)                        | 11.06 (-63.07 to 85.19)                                    |
|                                 | Equipment                                | 1745.14 (1566.61 to 1923.67)                 | 1713.71 (1544.17 to 1883.24)                     | 31.43 (-217.64 to 280.50)                                  |
|                                 | Other Health Professional Visits         | 195.03 (148.98 to 241 to 08)                 | 236.25 (177.13 to 295.37)                        | -41.22 (-115.34 to 32.89)                                  |
| Total follow-up cost            | 5286.71 (4864.22 to 5709.20)             | 5281.51 (4882.67 to 5680.35)                 | 5.20 (-583.51 to 593.90)                         |                                                            |
| <b>Total cost at 24months</b>   |                                          | 6450.14 (6003.52 to 6896.75)                 | 8667.52 (8255.35 to 9079.69)                     | -2217.38 (-2825.38 to -1609.38)                            |
| <b>PATIENT/CARER COSTS</b>      |                                          |                                              |                                                  |                                                            |
| <b>Days 0-3</b>                 | Days off school                          | 65.50 (56.18 to 74.81)                       | 57.05 (47.08 to 67.02)                           | 8.45 (-5.34 to 22.23)                                      |
|                                 | Days off work                            | 250.28 (203.29 to 297.27)                    | 255.55 (200.81 to 310.29)                        | -5.27 (-76.95 to 66.41)                                    |
|                                 | Travel                                   | 10.65 (9.14 to 12.16)                        | 18.31 (15.45 to 21.18)                           | -7.66 (-10.90 to -4.43)                                    |
|                                 | Out of pocket expenses                   | 8.37 (6.75 to 9.98)                          | 22.25 (17.03 to 27.48)                           | -13.89 (-19.33 to -8.44)                                   |
|                                 | Total cost days 0-3                      | 331.25 (279.76 to 382.74)                    | 352.21 (292.14 to 412.27)                        | -20.96 (-100.82 to 58.90)                                  |
| <b>Follow-up</b>                | Days off school                          | 443.35 (363.28 to 523.43)                    | 454.19 (348.95 to 559.42)                        | -10.83 (-143.31 to 121.65)                                 |

|                               |                        |                              |                                 |                                 |
|-------------------------------|------------------------|------------------------------|---------------------------------|---------------------------------|
| <b>(24months)</b>             | Days off work          | 868.55 (609.27 to 1127.82)   | 1180.47 (679.45 to 1681.49)     | -311.92 (-871.30 to 247.46)     |
|                               | Travel                 | 63.39 (55.90 to 70.88)       | 60.58 (49.06 to 72.11)          | 2.81 (-11.07 to 16.68)          |
|                               | Out of pocket expenses | 44.34 (32.23 to 56.44)       | 41.88 (29.77 to 54.00)          | 2.45 (-14.89 to 19.79)          |
|                               | Total follow-up cost   | 1419.63 (1134.35 to 1704.91) | 1737.12 (1207.22 to 2267.023)   | -317.49 (-916.19 to 281.21)     |
| <b>Total cost at 24months</b> |                        | 1750.88 (1447.80 to 2053.95) | 2089.33 (1547.32 to 2631.33)    | -338.45 (-962.89 to 285.99)     |
| <b>TOTAL COST</b>             |                        | 8201.02 (7585.40 to 8816.63) | 10756.85 (10050.29 to 11463.41) | -2555.83 (-3493.73 to -1617.93) |

For peer review only

Table 2 Units of resource use

|                                       |                                 | Home Management (n = 98) |         |         | Hospital Management (n = 95) |         |         |
|---------------------------------------|---------------------------------|--------------------------|---------|---------|------------------------------|---------|---------|
|                                       |                                 | Median                   | Range   |         | Median                       | Range   |         |
|                                       |                                 |                          | Minimum | Maximum |                              | Minimum | Maximum |
| <b>DIRECT HEALTHCARE RESOURCE USE</b> |                                 |                          |         |         |                              |         |         |
| <b>Days 0-3</b>                       | Contacts with the diabetes team |                          |         |         |                              |         |         |
|                                       | - Consultant                    | 1.0                      | 0.0     | 9.0     | 2.0                          | 0.0     | 5.0     |
|                                       | - Junior doctor                 | 1.0                      | 0.0     | 5.0     | 3.0                          | 0.0     | 10.0    |
|                                       | - Nurse                         |                          |         |         |                              |         |         |
|                                       | • Face to face                  | 6.0                      | 0.0     | 13.0    | 6.0                          | 0.0     | 32.0    |
|                                       | • Telephone calls/emails        | 2.0                      | 0.0     | 28.0    | 0.0                          | 0.0     | 3.0     |
|                                       | - Dietitian                     | 1.0                      | 0.0     | 3.0     | 1.0                          | 0.0     | 3.0     |
|                                       | Other health care professionals | 0.0                      | 0.0     | 1.0     | 0.0                          | 0.0     | 2.0     |
|                                       | Test and investigations         |                          |         |         |                              |         |         |
|                                       | - Diagnosis related             | 4.0                      | 0.0     | 8.0     | 5.0                          | 1.0     | 12.0    |
|                                       | - Other                         | 2.0                      | 0.0     | 4.0     | 3.0                          | 0.0     | 6.0     |
|                                       | Hospital stay (days)            | 0.0                      | 0.0     | 0.0     | 3.0                          | 0.0     | 6.0     |
|                                       | Travel                          |                          |         |         |                              |         |         |
|                                       | - Nurse travel distance (miles) | 40.0                     | 0.0     | 214.0   | 0.0                          | 0.0     | 192.0   |
| - Dietician travel distance (miles)   | 0.0                             | 0.0                      | 24.0    | 0.0     | 0.0                          | 32.0    |         |
| <b>Follow-up (24months)</b>           | Contacts with the diabetes team |                          |         |         |                              |         |         |
|                                       | - Outpatient*                   | 9.0                      | 6.0     | 18.0    | 9.0                          | 6.0     | 16.0    |
|                                       | - Other**                       | 28.5                     | 2.0     | 128.0   | 31.0                         | 2.0     | 158.0   |
|                                       | Hospital contacts               |                          |         |         |                              |         |         |
|                                       | - A&E                           | 0.0                      | 0.0     | 8.0     | 0.0                          | 0.0     | 6.0     |
|                                       | - Ward                          | 0.0                      | 0.0     | 16.0    | 0.0                          | 0.0     | 8.0     |
|                                       | Tests and investigations***     | 0.0                      | 0.0     | 11.0    | 0.0                          | 0.0     | 8.0     |
|                                       | Insulin                         | 18889.5                  | 2138.0  | 64354.0 | 19669.0                      | 2351.5  | 48858.0 |
|                                       | Other health professionals      |                          |         |         |                              |         |         |
|                                       | - GP                            | 2.0                      | 0.0     | 14.0    | 2.0                          | 0.0     | 19.0    |
| - Nurse                               | 1.0                             | 0.0                      | 8.0     | 0.0     | 0.0                          | 31.0    |         |

|                                         |                            |      |     |       |      |     |       |
|-----------------------------------------|----------------------------|------|-----|-------|------|-----|-------|
|                                         | - Other                    | 0.0  | 0.0 | 11.0  | 0.0  | 0.0 | 22.0  |
| <b>PATIENT/CARER RESOURCE USE</b>       |                            |      |     |       |      |     |       |
| <b>Days 0-3</b>                         | Days off school            | 2.0  | 0.0 | 5.0   | 2.0  | 0.0 | 5.0   |
|                                         | Days off work              | 2.0  | 0.0 | 9.0   | 2.0  | 0.0 | 14.0  |
|                                         | Travel (hours)             | 2.0  | 0.0 | 7.0   | 3.0  | 0.0 | 16.0  |
|                                         | Out of pocket expenses (£) | 10.9 | 0.0 | 38.1  | 16.3 | 0.0 | 87.0  |
| <b>Follow-up (24months)</b>             | Days off school            | 11.0 | 0.0 | 64.0  | 11.0 | 0.0 | 129.0 |
|                                         | Days off work              | 3.3  | 0.0 | 70.0  | 4.0  | 0.0 | 164.0 |
|                                         | Travel (hours)             | 10.0 | 0.0 | 96.0  | 9.0  | 0.0 | 92.0  |
|                                         | Out of pocket expenses (£) | 33.0 | 0.0 | 546.0 | 27.0 | 0.0 | 467.5 |
| <b>Total Patient/carer resource use</b> | Days off school            | 13.0 | 0.0 | 66.0  | 13.5 | 0.0 | 132.0 |
|                                         | Days off work              | 5.0  | 0.0 | 78.0  | 6.5  | 0.0 | 167.5 |
|                                         | Travel (hours)             | 12.0 | 3.0 | 99.0  | 13.0 | 0.0 | 94.0  |
|                                         | Out of pocket expenses (£) | 42.8 | 0.0 | 546.0 | 47.7 | 0.0 | 554.8 |

\*Two patients had visits with the nurse outside of the patient setting. \*\*Home visits, telephone calls and emails. \*\*\*From CRF 7 only.



### Cost effectiveness

Home management dominated hospital management. In the base case analysis, the ICER was £7,434 saved per additional mmol/mol reduction of HbA1c (Table 3). Based on the bootstrapped analysis for consideration of the joint uncertainty in costs and effects, the cost-effectiveness plane shows that home management has the potential to be cost saving for the NHS without changing clinical effectiveness (Figure 1a). The cost-effectiveness acceptability curve (CEAC) is somewhat counterintuitive for cost-saving interventions, in that the probability of home management being cost-effective reduces to 50% when the willingness to pay increases to £7,770 per unit reduction of HbA1c (mmol/mol) (Figure 1b).

An alternative unit cost for an overnight paediatric stay in hospital was explored through a univariate sensitivity analysis. This figure was based on a previous study (34), inflated to the current year, to give a value of £691.95. This had no significant impact on the ICER (£5,451 saving per additional unit reduction in HbA1c (mmol/mol)) and the difference in direct healthcare costs between home and hospital at 24 months remained statistically significant (Table 3, Supplementary Materials Table 16 and Supplementary Materials Figure 2).

Adopting a broader cost perspective by incorporating both direct healthcare and non-healthcare costs, the ICER increased to £8,585 saving per additional mmol/mol reduction of HbA1c (Table 3). This does not have a significant effect on the distribution on the cost-effectiveness plane or on the probability of home management being cost-effective (Supplementary materials tables 15 and Supplementary Materials Figure 1). Home management remained the dominant strategy.

### Cost Consequences Analysis

A table presenting costs alongside psychological, physical and social consequences reported in the main trial is displayed in Supplementary Materials Table 17. Outcomes are taken from the child questionnaires.

Table 3 Cost-effectiveness results for each analysis scenario

| Analysis Scenario                             | Incremental cost (£)* | Incremental effect (HbA1c in mmol/mol) | ICER**          | Cost-effectiveness probability for given WTP (%) |         |         |
|-----------------------------------------------|-----------------------|----------------------------------------|-----------------|--------------------------------------------------|---------|---------|
|                                               |                       |                                        |                 | £5,000                                           | £10,000 | £15,000 |
| Direct Healthcare perspective                 | -2182.29              | -0.294                                 | Dominant (7434) | 51.2                                             | 48.8    | 48.1    |
| Direct Healthcare + Patient/carer perspective | -2520.20              | -0.294                                 | Dominant (8585) | 51.9                                             | 49.6    | 48.3    |
| Sensitivity analysis                          | -1600.11              | -0.294                                 | Dominant (5451) | 50.3                                             | 48.4    | 47.6    |

\* difference in cost between home and hospital management. \*\* (£ saved per additional unit change in HbA1c (mmol/mol))

## Discussion

This economic evaluation was designed to assess whether delivering management at home for children with T1D who are clinically well at diagnosis would represent a cost-effective strategy for the NHS. The results indicate that the difference between home and hospital management in terms of direct NHS costs over 24 months, of £2,182 per patient, is significant, and in favour of home management. Uncertainty analysis indicated that the probability of home management being cost saving was 1.0. The greatest driver of differences in healthcare costs was the cost of hospitalisation during the initiation period. The ICER for the base-case analysis indicated that home management was dominant, with £7,434 saved per additional unit reduction in mmol/mol of HbA1c. Sensitivity analysis indicated that the cost-effectiveness was stable to the choice of which costs were included. However, there is considerable uncertainty around the difference in effect (HbA1c), reflected in the probability of the cost-effectiveness on the CEAC being ~0.5 even at high thresholds of willingness to pay.

### Strengths and weaknesses

The major strength of this evaluation is that it is based on an RCT, which reduces the risk for potential bias and uses patient-level data. The analysis was conducted in line with the main trial to ensure consistency and methods followed the NICE reference case.

A limitation of this study is that QALYs were not used as the measure of health outcome. The main trial did not collect data on health-utility in order to estimate QALYs due to the lack of a validated paediatric utility measure at the time of study commencement, especially in younger children.(35) Therefore, we are unable to determine whether the ICER would be acceptable, given the NICE threshold of £20,000-30,000 per QALY. However, HbA1c is known to be a useful surrogate outcome measure in assessing the effectiveness of interventions for T1D as it is positively associated with an increased risk of long-term complications.(36, 37) The ADaPT study of a diabetes-specific psychological intervention administered by diabetes nurses is an example of a trial which reports costs alongside HbA1c improvement, in addition to QALYs. The authors state that basing cost-effectiveness on HbA1c outcomes rather than QALYs can lead to higher probabilities of cost-effectiveness and this is an important point to be aware of when interpreting our results.(38) However, their ICER of £457 per 1mmol/mol decrease in HbA1c is based on spending more for decreases in HbA1c, not saving costs as in our ICER, and therefore is not comparable for interpreting WTP.

This leads to a second limitation in that we chose not to perform long-term extrapolation to assess the cost-effectiveness over a patient's lifetime. Life-time extrapolation relies on economic models which use QALYs as the measure of effect. However, despite many models existing for use in T1D, a lack of validation in the paediatric setting undermines their application in the context of the DECIDE trial.(39) Moreover, as there was no statistically significant difference in clinical effectiveness, this would also require assumptions on long-term benefits which could introduce bias.

1  
2  
3 The accuracy of the final unit costings may have been impacted by varying  
4 interpretation of case report forms and ability to recall, as parents were asked to  
5 recall answers by nurses who then completed the forms. However, questions about  
6 resource use were limited to a 3-month recall period, which is the general recall  
7 period for trial-based economic evaluations.(40) Completion rates of forms were also  
8 high, with a small proportion of missing data.  
9  
10

11 A final limitation is that there have been changes in practice and consequently  
12 resource use and costs since the trial commenced. For example, test and  
13 investigation use was costed from one site only and this figure is likely to differ  
14 across centres. However, all costs were updated to, or based on, most recent figures  
15 to ensure relevance to the current NHS costs and any differences between sites to  
16 the overall outcomes was considered likely to be small and therefore unlikely to  
17 effect the overall findings.  
18  
19

### 20 **Context in the current literature**

21 This is the first cost-effectiveness evaluation to compare home versus hospital  
22 management of T1D at diagnosis in children and young people in a UK setting.  
23 Costs were based on the UK healthcare system (NHS) and taken from national UK  
24 databases. The trial was conducted over eight different centres throughout the UK  
25 and hospital management was pragmatic, following local standard practice, which  
26 increases our confidence in the generalisability of the results to other areas of the  
27 UK.  
28  
29

30 The findings of this evaluation are comparable to other studies.(4, 5) However,  
31 interpretation of previous studies is limited by the use of small sample sizes, non-UK  
32 settings and all of them involved 'hybrid' models of care; meaning 'home  
33 management' involved care within the hospital and home/outpatient setting.  
34 Therefore, previous studies have not evaluated home care exclusively from the day  
35 of diagnosis and their reproducibility within the UK healthcare setting may be limited.  
36  
37

### 38 **Implications for practice and research**

39 Home management led to significant cost reductions for the NHS at both three days  
40 and 24 months. This economic evaluation, alongside the main trial provides  
41 evidence for home care being the first line approach for management of T1D at  
42 diagnosis in children who are clinically well. However, since the start of this trial,  
43 education has become more intensive and insulin delivery and blood glucose  
44 monitoring more complex. As a result, many centres choose to admit all patients by  
45 default, despite NICE guidance supporting home management.(10) The identified  
46 cost-saving of around £2,000 per patient (over 2 years) could be invested in  
47 community services to manage this increased demand on healthcare professionals,  
48 increasing the feasibility of delivering a package of care which would normally be  
49 delivered in hospital.  
50  
51

52 It is envisaged that the results of this analysis will contribute to the evidence  
53 supporting future updates of NICE Guidelines on management of T1D in children  
54 and adolescents at diagnosis. Further research could involve testing a hybrid model  
55 of care within the UK-setting, incorporating updates in the management approach,  
56 and measuring costs and utility.  
57  
58  
59  
60

## Conclusion

Home management from diagnosis of T1D for children who are medically stable represents a saving of £2,182 per patient with no significant impact on clinical effectiveness. These findings add to the main DECIDE trial which demonstrated that home management at the onset of T1D did not lead to any significant differences in glycaemic control. With incidence of T1D increasing and the demand for hospital beds rising, implementation of this approach as standard practice could prove to be a cost-saving step in the patient pathway.

### **Funding statement**

This work was supported by Diabetes UK grant number RD06/0003353

### **Role of the funding source**

The funders of the study had no role in study design, data collection, data analysis, data interpretation, or writing of the report.

### **Competing interests statement**

All authors have completed the ICMJE uniform disclosure form at [www.icmje.org/doi\\_disclosure.pdf](http://www.icmje.org/doi_disclosure.pdf) and declare: no support from any organisation for the submitted work; no financial relationships with any organisations that might have an interest in the submitted work in the previous three years; no other relationships or activities that could appear to have influenced the submitted work.

### **Author contributions**

ZMcC had full access to all the data in the study, conducted the analyses and drafted the manuscript. JT, JWG, TP and DH supervised ZMcC and take responsibility of the study in its entirety and for the decision to submit for publication.

JWG, RP and MR were responsible for developing the initial DECIDE research question and trial design, and implementation of the trial protocol. DH, TP and RP were responsible for all statistical considerations and analysis. DH was responsible for designing the health economics study. All those listed as authors contributed to the trial delivery and health economics study and were responsible for reading, commenting upon, and approving the final manuscript. The manuscript's guarantors (JT, JWG and DH) affirm that the manuscript is an honest, accurate, and transparent account of the study being reported; that no important aspects of the study have been omitted; and that any discrepancies from the study as planned (and, if relevant, registered) have been explained.

### **Acknowledgements**

The authors acknowledge with thanks the trial funders Diabetes UK and all the patients and carers participating in the trial. The Centre for Trials Research receives funding by the Welsh Government through Health and Care Research Wales and the authors gratefully acknowledge the Centre's contribution to trial implementation. The authors acknowledge the contribution of Prof Kerry Hood who contributed to the initial trial design and conduct throughout; Mirella Longo and Prof David Cohen who contributed to the design of the health economic methodology, prior to, and during data collection. Trial Steering Committee (Adele McEvilly, Chris Patterson and Michael Bowdery), chaired by Dr Peter Swift; the trial administrator, Jackie Swain; the clinical teams at each of the 8 trial sites, the DECIDE project nurses and research nurses from NISCHR who provided support to the trial; the participating NHS Trusts and local Principal Investigators were The Royal Hospitals Belfast Health and Social Care Trust (Dr Dennis Carson), Cambridge (Dr Carlo Acerini), Cardiff and Vale NHS Trust (Prof JW Gregory and Dr JT Warner), Hull and East Yorkshire Hospitals NHS Trust (Dr Verghese Mathew), Alder Hey Children's NHS Foundation Trust, Liverpool (Dr Princy Paul), Newcastle upon Tyne Hospitals Foundation NHS Trust (Dr Tim Cheetham), Nottingham University Hospitals NHS Trust (Dr Tabitha Randell), University Hospital, Southampton NHS Trust (Dr Nicola Trevelyan and Dr Justin Davies); the stakeholders and others who have contributed.

### **Data sharing**

1  
2  
3 De-identified participant data will be made available to the scientific community with as few  
4 restrictions as feasible, whilst retaining exclusive use until the publication of major outputs. Data will  
5 be available via the corresponding author.  
6

7 ***Patient and public involvement***

8 There was no direct involvement of patients or the public in this health economics study. However, two  
9 parents of children diagnosed with T1D were involved in the initial design of the DECIDE trial. One of  
10 these parents was a co-applicant on the funding application and was instrumental in ensuring that the  
11 trial was informed by the families' experience. She also attended the ethics committee meeting to  
12 provide a service user perspective of the value of the trial to inform the committee's decision. She and  
13 another parent were part of the Trial Management Group which met monthly and provided input on the  
14 conduct of the trial throughout.  
15  
16  
17  
18  
19  
20  
21  
22  
23  
24  
25  
26  
27  
28  
29  
30  
31  
32  
33  
34  
35  
36  
37  
38  
39  
40  
41  
42  
43  
44  
45  
46  
47  
48  
49  
50  
51  
52  
53  
54  
55  
56  
57  
58  
59  
60

For peer review only

## REFERENCES

1. Diabetes UK. The Cost of Diabetes. Diabetes.org.uk2014. Available from: <https://www.diabetes.org.uk/resources-s3/2017-11/diabetes%20uk%20cost%20of%20diabetes%20report.pdf>.
2. BMA. NHS Bed Occupancy Report. London; 2017.
3. England N. NHS England » NHS Five Year Forward View: NHS England; 2014 [Available from: <https://www.england.nhs.uk/five-year-forward-view/>].
4. Clar C, Waugh N, Thomas S. Routine hospital admission versus out-patient or home care in children at diagnosis of type 1 diabetes mellitus. *The Cochrane database of systematic reviews*. 2007(2):CD004099.
5. Tiberg I, Lindgren B, Carlsson A, et al. Cost-effectiveness and cost-utility analyses of hospital-based home care compared to hospital-based care for children diagnosed with type 1 diabetes; a randomised controlled trial; results after two years' follow-up. *BMC Pediatrics*. 2016;16:94.
6. Jasinski CF, Rodriguez-Monguio R, Tonyushkina K, et al. Healthcare cost of type 1 diabetes mellitus in new-onset children in a hospital compared to an outpatient setting. *BMC pediatrics*. 2013;13(1):55.
7. RCPCH. National Paediatric Diabetes Audit 2017/18. RCPCH; 2019.
8. Diabetes UK. What are the signs and symptoms of diabetes? 2019 [Available from: <https://www.diabetes.org.uk/diabetes-the-basics/diabetes-symptoms>].
9. Diabetes Control and Complications Trial /Epidemiology of Diabetes Interventions and Complications Study Research G. Intensive Diabetes Treatment and Cardiovascular Outcomes in Type 1 Diabetes: The DCCT/EDIC Study 30-Year Follow-up. *Diabetes care*. 2016;39(5):686-93.
10. NICE. Overview | Diabetes (type 1 and type 2) in children and young people: diagnosis and management | Guidance | NICE: NICE; 2016 [Available from: <https://www.nice.org.uk/guidance/ng18>].
11. Commodari E. Children staying in hospital: a research on psychological stress of caregivers. *Italian Journal of Pediatrics*. 2010;36(1):40.
12. Lowes L, Lyne P, Gregory JW. Childhood diabetes: parents' experience of home management and the first year following diagnosis. *Diabetic medicine : a journal of the British Diabetic Association*. 2004;21(6):531-8.
13. Cartland J, Ruch-Ross HS, Carr L, et al. The Role of Hospital Design in Reducing Anxiety for Pediatric Patients. *HERD: Health Environments Research & Design Journal*. 2018;11(3):66-79.
14. RCPCH. National Paediatric Diabetes Audit Hospital admissions and complications reports 2011-2015. 2017.
15. Tiberg I, Carlsson A, Hallström I. A Methodological Description of a Randomised Controlled Trial Comparing Hospital-Based Care and Hospital-Based Home Care when a Child is Newly Diagnosed with Type 1 Diabetes. *The open nursing journal*. 2011;5(1):111.
16. Gregory JW, Townson J, Channon S, et al. Effectiveness of home or hospital initiation of treatment at diagnosis for children with type 1 diabetes (DECIDE trial): a multicentre individually randomised controlled trial. *BMJ Open*. 2019;9(12).
17. Townson JK, Gregory JW, Cohen D, et al. Delivering early care in diabetes evaluation (DECIDE): a protocol for a randomised controlled trial to assess hospital versus home management at diagnosis in childhood diabetes. *BMC pediatrics*. 2011;11:7.
18. NICE. Guide to the methods of technology appraisal 2013. NICE; 2013.
19. López-Bastida J, López-Siguero JP, Oliva-Moreno J, et al. Social economic costs of type 1 diabetes mellitus in pediatric patients in Spain: CHRYSTAL observational study. *Diabetes Research and Clinical Practice*. 2017;127:59-69.
20. Curtis LAB, Amanda. Unit Costs of Health and Social Care 2019. Kent, UK: PSSRU; 2019 [cited 2020 09/03/2020]. Available from: <https://www.pssru.ac.uk/publications/pub-5833/>.
21. NHS Improvement and NHS England. Annex A: The national tariff workbook. NHS Improvement; 2020.
22. CCEMG-EPPI. CCEMG - EPPI-Centre Cost Converter v.1.4 2019 [Available from: <http://epi.ioe.ac.uk/costconversion/default.aspx>].
23. NICE. BNF for Children: British National Formulary [CorporatePage]. NICE; 2020 [updated 10/02/2020. Available from: <https://bnfc.nice.org.uk/>].
24. NHS Electronic Drug Tariff [Internet]. NHS Business Services Authority. 2020 [cited 10/03/2020]. Available from: <http://www.drugtariff.nhsbsa.nhs.uk/>.

25. Office for National Statistics. Employee earnings in the UK: Office for National Statistics –; 2019 [cited 2020 10/03/2020]. Available from: <https://www.ons.gov.uk/employmentandlabourmarket/peopleinwork/earningsandworkinghours/bulletins/annualsurveyofhoursandearnings/2019>.
26. Belfield CF, C. Sibieta, L. Annual Report on Education Spending in England. London: The Institute for Fiscal Studies; 2018 [cited 2020 27/03/2020].
27. Office for National Statistics. Consumer price inflation, UK. Office for National Statistics - Consumer price inflation; 2020.
28. Corp. I. IBM SPSS Statistics for Windows. In: Armonk N, editor. 25.0 ed: IBM Corp.; 2017.
29. Gomes M, Ng ESW, Grieve R, et al. Developing Appropriate Methods for Cost-Effectiveness Analysis of Cluster Randomized Trials. *Medical Decision Making*. 2012;32(2):350-61.
30. StataCorp. Stata Statistical Software: Release 16. 16 ed. College Station, TX.: StataCorp LLC.; 2019.
31. Briggs AH, O'Brien BJ, Blackhouse G. THINKING OUTSIDE THE BOX: Recent Advances in the Analysis and Presentation of Uncertainty in Cost-Effectiveness Studies. *Annual Review of Public Health*. 2002;23(1):377-401.
32. Fenwick E, O'Brien BJ, Briggs A. Cost-effectiveness acceptability curves--facts, fallacies and frequently asked questions. *Health economics*. 2004;13(5):405.
33. Husereau DD, M. Petrou, S. et al. Consolidated Health Economic Evaluation Reporting Standards (CHEERS). *Value Health*; 2013.
34. Harron K, Mok Q, Dwan K, et al. CATHeter Infections in CHildren (CATCH): a randomised controlled trial and economic evaluation comparing impregnated and standard central venous catheters in children. *Health Technology Assessment*. 2016;20(18):1-+.
35. Chen G, Ratcliffe J. A Review of the Development and Application of Generic Multi-Attribute Utility Instruments for Paediatric Populations. *PharmacoEconomics*. 2015;33(10):1013-28.
36. Nordwall M, Abrahamsson M, Dhir M, et al. Impact of HbA(1c), Followed From Onset of Type 1 Diabetes, on the Development of Severe Retinopathy and Nephropathy: The VISS Study (Vascular Diabetic Complications in Southeast Sweden). *Diabetes Care*. 2015;38(2):308-15.
37. Virk SA, Donaghue KC, Cho YH, et al. Association Between HbA1c Variability and Risk of Microvascular Complications in Adolescents With Type 1 Diabetes. *The Journal of Clinical Endocrinology & Metabolism*. 2016;101(9):3257-63.
38. Ismail K, Maissi E, Thomas S, et al. A randomised controlled trial of cognitive behaviour therapy and motivational interviewing for people with type I diabetes mellitus with persistent sub-optimal glycaemic control: A Diabetes and Psychological Therapies (ADaPT) study. *Health Technology Assessment*. 2010;14(22):1-+.
39. Valentine WJ, Pollock RF, Saunders R, et al. The Prime Diabetes Model: Novel Methods for Estimating Long-Term Clinical and Cost Outcomes in Type 1 Diabetes Mellitus. *Value in Health*. 2017;20(7):985-91.
40. Ridyard CH, Hughes DA. Methods for the Collection of Resource Use Data within Clinical Trials: A Systematic Review of Studies Funded by the UK Health Technology Assessment Program. *Value in Health*. 2010;13(8):867-72.

Figure 1a and 1b

**Figure 1**

(a) Cost-effectiveness plane of base case analysis

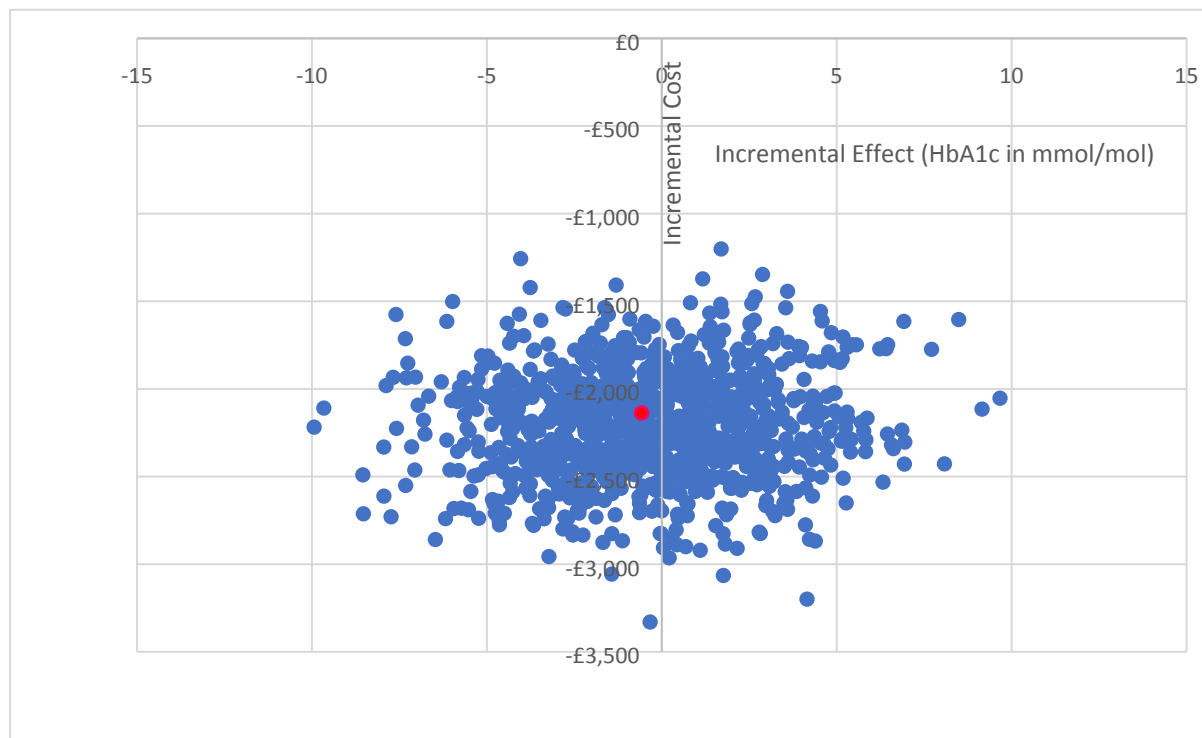

(b) Cost-effectiveness acceptability curve for base case analysis.

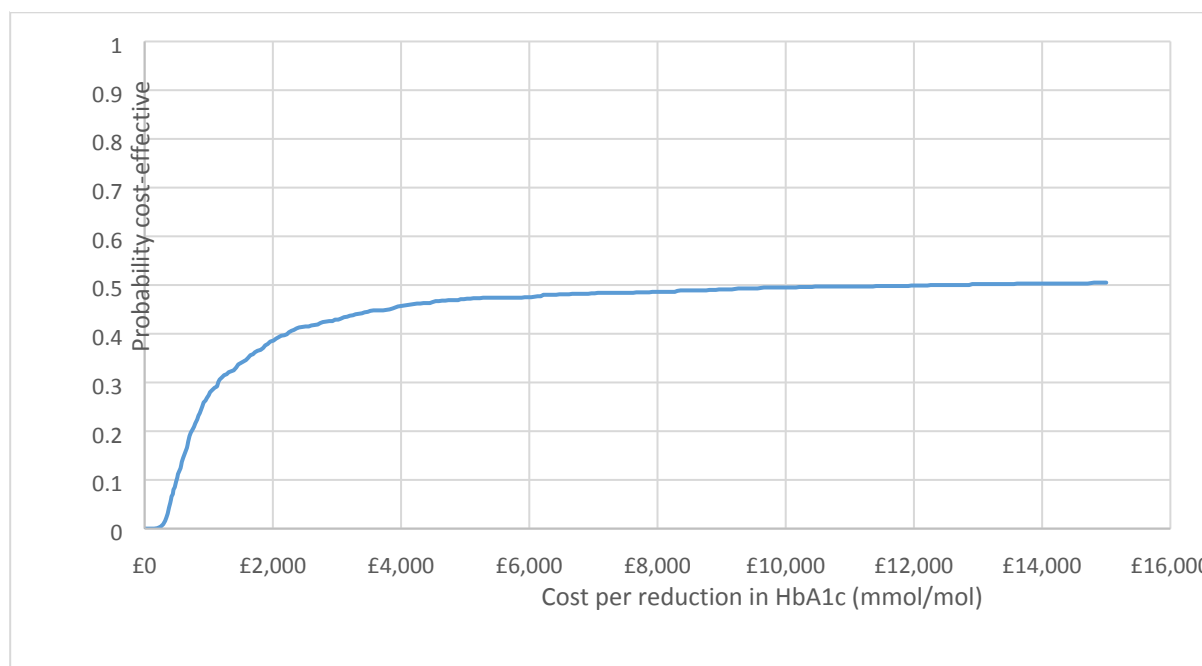

**Figure 1**

(a) Reduction in HbA1c represents improvement.

● = point estimate ICER £7,434 per mmol/mol reduction of HbA1c (-0.294, -£2,182)

(b) Represents the probability of home management being cost-effective at different willingness to pay thresholds.



# SUPPLEMENTARY MATERIALS

Table 1 Case Report Forms and Data Collected

| Case Report Form        | Data Collected                                                                                                                                                                                         |
|-------------------------|--------------------------------------------------------------------------------------------------------------------------------------------------------------------------------------------------------|
| 2 & 3                   | <ul style="list-style-type: none"> <li>• Admission/discharge</li> <li>• Additional tests</li> <li>• Insulin Regimen</li> <li>• Contacts with diabetes team</li> </ul>                                  |
| 4, 5 & 6                | <ul style="list-style-type: none"> <li>• Insulin regime</li> <li>• Medical equipment</li> <li>• Contact with diabetes team</li> <li>• Hospital contacts</li> <li>• Contacts with other HCPs</li> </ul> |
| 7                       | <ul style="list-style-type: none"> <li>• Additional tests</li> <li>• Insulin regime</li> <li>• Contact with diabetes team</li> <li>• Hospital contacts</li> <li>• Contacts with other HCPs</li> </ul>  |
| 3.1, 4.1, 5.1, 6.1, 7.1 | <ul style="list-style-type: none"> <li>• Time off work/school</li> <li>• Travel expenses</li> </ul>                                                                                                    |

peer review only

1  
2  
3  
4  
5  
6  
7  
8  
9  
10  
11  
12  
13  
14  
15  
16  
17  
18  
19  
20  
21  
22  
23  
24  
25  
26  
27  
28  
29  
30  
31  
32  
33  
34  
35  
36  
37  
38  
39  
40  
41  
42  
43  
44  
45  
46

**Table 2 Unit costs for contact with healthcare professionals**

| Contact with Healthcare Professional         | Unit Cost (£) | Source                      |
|----------------------------------------------|---------------|-----------------------------|
| <b>Hospital based care</b>                   |               |                             |
| Overnight stay in hospital (up to 5days)     | 894.00        | NHS Reference Costs 2019/20 |
| Overnight stay in hospital (exceeding 5days) | 417.00        |                             |
| Consultant ward visit                        | 109.00        | PSSRU 2019                  |
| Junior Doctor ward visit                     | 29.00         |                             |
| Nurse ward visit                             | 47.00         |                             |
| Dietitian ward visit                         | 46.00         |                             |
| Hospital Pharmacist                          | 6.92          |                             |
| <b>Home based care</b>                       |               |                             |
| Initial home visit                           | 220.00        | PSSRU 2019                  |
| Community Nurse home visit                   | 55.00         |                             |
| Community Nurse telephone calls & emails     | 12.25         |                             |
| Practice Nurse clinic visit                  | 6.45          |                             |
| Practice Nurse telephone calls & emails      | 4.59          |                             |
| Dietitian home visit                         | 16.00         | PSSRU 2010,2019             |
| Dietitian telephone calls & emails           | 5.25          | PSSRU 2019                  |
| GP home visit                                | 85.00         |                             |
| GP Surgery visit                             | 39.23         |                             |
| Telephone calls                              | 17.00         |                             |
| Consultant-led Outpatient attendance         | 205.00        |                             |
| Non-Consultant-led outpatient attendance     | 155.00        |                             |

Table 3 Unit Costs of Contact with Health Care Professionals

| Resource item                            | Details                                                                                                      | Cost source | Unit Cost (£) |
|------------------------------------------|--------------------------------------------------------------------------------------------------------------|-------------|---------------|
| <b>Hospital Based Care</b>               |                                                                                                              |             |               |
| Overnight stay in Hospital               | NHS Reference cost 2019/20 PK68C CC Score 0, cost of combined day case/ordinary elective spell.              | a           | 894.00        |
|                                          | Per day long stay payment (for days exceeding trim point of 5 days).                                         | a           | 417.00        |
| Consultant ward visit                    | Medical Consultant, hourly rate.                                                                             | b           | 109.00        |
| Junior Doctor ward visit                 | Foundation House Officer Year 1, hourly rate.                                                                | b           | 29.00         |
| Nurse ward visit                         | Nurse team leader, hourly rate.                                                                              | b           | 47.00         |
| Dietitian ward visit                     | Hospital Dietitian, Average visit 1hour, hourly rate (Band 6).                                               | b           | 46.00         |
| Hospital Pharmacist                      | £45 per hour. Assumed length of consultation same as GP = 9.22minutes. = £6.92.                              | b           | 6.92          |
| <b>Home Based Care</b>                   |                                                                                                              |             |               |
| Initial home visit                       | Community Nurse, hourly rate £55.2 hourly visits. 2 x daily to supervise injections.                         | b           | 220.00        |
| Community Nurse home visit               | PSSRU 2019: Band 7 =£55.00 per hour.                                                                         | b           | 55.00         |
| Community Nurse telephone calls & emails | Patient-related work, hourly rate £112 (Band 7). Average length of Nurse-led telephone triage = 6.56minutes. | b           | 12.25         |
| Practice Nurse clinic visit              | Hourly rate £42 per hour. Assumed surgery length same as GPs = 9.22minutes.                                  | b           | 6.45          |
| Practice Nurse telephone calls & emails  | Hourly rate £42 per hour. Average length of Nurse-led telephone triage = 6.56minutes.                        | b           | 4.59          |

|                                                     |                                                                                                                                                                                          |      |        |
|-----------------------------------------------------|------------------------------------------------------------------------------------------------------------------------------------------------------------------------------------------|------|--------|
| Dietitian home visit                                | No rates for Community Dietician. Community Occupational Therapist hourly rate = £48 per hour. No information for average length of visit. If assume 20minutes from PSSRU 2010 = £16.00. | b, c | 16.00  |
| Dietitian telephone calls & emails                  | Hourly rate £48.00. Assumed duration of 6.56minutes (same as Nurse telephone triage).                                                                                                    | b    | 5.25   |
| GP home visit                                       | £255/hour of patient contact. Assuming duration of 20minutes.                                                                                                                            | b    | 85.00  |
| GP Surgery visit                                    | Cost per surgery consultation lasting 9.22minutes                                                                                                                                        | b    | 39.23  |
| Telephone calls                                     | Average length of GP-led triage is 4minutes so x hourly rate of £255                                                                                                                     | b    | 17.00  |
| Consultant-led Outpatient attendance                | Paediatric Consultant-led Outpatient attendance.                                                                                                                                         | b    | 205.00 |
| Non-Consultant-led outpatient attendance            | Paediatric non-consultant-led outpatient attendance.                                                                                                                                     | b    | 155.00 |
| <b>Other Contact with Health Care Professionals</b> |                                                                                                                                                                                          |      |        |
| Consultant Telephone Call                           | Hourly rate £109. Assumed duration of 6.56minutes (same as Nurse-led telephone triage).                                                                                                  | b    | 11.92  |
| Registrar ward visit                                | Hourly rate £47. Assumed 20minute consultation.                                                                                                                                          | b    | 15.67  |
| Clinical Psychologist                               | Hourly rate.                                                                                                                                                                             | b    | 54.00  |
| CAMHS Nurse                                         | Hourly rate (Band 7 Nurse).                                                                                                                                                              | b    | 57.00  |
| Speech and Language Therapist                       | Hourly rate (Band 6).                                                                                                                                                                    | b    | 46.00  |
| Physiotherapist                                     | Scientific and professional staff. Hourly rate (Band 6).                                                                                                                                 | b    | 45.00  |
| Podiatrist                                          | Hospital-based scientific and professional staff. Hourly rate (Band 6).                                                                                                                  | b    | 46.00  |
| Family Advocate                                     | Not rates for general family advocate. Advocacy for parents requiring learning disability support. Hourly rate.                                                                          | b    | 31.00  |

|               |                                                                                                  |   |       |
|---------------|--------------------------------------------------------------------------------------------------|---|-------|
| Social Worker | Hourly rate.                                                                                     | b | 50.00 |
| Dentist       | Hourly rate £104. Assumed duration same as GP = 9.22minutes.                                     | b | 15.98 |
| Osteopath     | No rates for osteopath. Scientific and Professional Staff. Hourly rate (Band 5).                 | b | 34.00 |
| Phlebotomist  | No rates for phlebotomist. Nurse (Band 4). Hourly rate £28. Assumed duration same as GP = £9.22. | b | 4.30  |

Table 4 Unit costs for Insulin

| Insulin                       | Details                                                                                                                                                                                 | Cost Source | Unit Cost (£) |
|-------------------------------|-----------------------------------------------------------------------------------------------------------------------------------------------------------------------------------------|-------------|---------------|
| Mixtard 30                    | Discontinued on 31 Dec 2010. Previously available as 5 x prefilled 3ml <i>InnoLet</i> ® £19.87 (range 2-78 units).                                                                      | d, e        | 19.87         |
| Novomix 30                    | 5 x FlexPen 100units/ml suspension for injection 3ml pre-filled pen = £29.89.                                                                                                           | e           | 29.89         |
| Humulin M3                    | 5 x Humulin M3 KwikPen 100units/ml suspension for injection 3ml pre-filled pen (Eli Lilly and Company Ltd).                                                                             | e           | 21.70         |
| Insulin Aspart (Novorapid)    | 5 x NovoRapid FlexTouch 100units/ml solution for injection 3ml pre-filled pen (Novo Nordisk Ltd) = £32.13.                                                                              | e           | 32.13         |
| Insulin Lispro (Humalog)      | 5 x Humalog KwikPen 100units/ml solution for injection 3ml pre-filled pen (Eli Lilly and Company Ltd) = £29.46.                                                                         | e           | 29.46         |
| Actrapid                      | Actrapid 100units/ml for injection 10ml vials (Novo Nordisk Ltd), 100 units per 1ml, net price 10mL vial = £7.48. Novopen devices no longer available so previous price of £26.86 used. | e           | 34.34         |
| Insulin Detemir (Levemir)     | 5 x Levemir InnotLet 100units/ml solution for injection 3ml pre-filled pen (Novo Nordisk Ltd) = £42                                                                                     | e           | 44.85         |
| Insulin Glargine (Lantus)     | 5 x Lantus 100units/ml solution for injection 3ml pre-filled SoloStar pen (Sanofi) = £37.77                                                                                             | e           | 37.77         |
| Isophane Insulin (Insulatard) | 5 x Insulatard InnoLet 100units/ml suspension for injection 3ml pre-filled pen (Novo Nordisk Ltd) = £20.40 NHS                                                                          | e           | 20.40         |

|                |                                                                                                                                                                                               |   |       |
|----------------|-----------------------------------------------------------------------------------------------------------------------------------------------------------------------------------------------|---|-------|
| Humalog Mix 25 | Humalog Mix25 KwikPen 100units/ml suspension for injection 3ml pre-filled pen (Eli Lilly and Company Ltd)<br>5 x Insulin lispro 75 unit per 1 ml and Insulin lispro 25 unit per 1 ml = £30.98 | e | 30.98 |
| Humalog Mix 50 | Humalog Mix50 KwikPen 100units/ml suspension for injection 3ml pre-filled pen (Eli Lilly and Company Ltd)<br>5 x Insulin lispro 50 unit per 1 ml = £30.98                                     | e | 30.98 |
| Humulin I      | Humulin I KwikPen 100units/ml suspension for injection 3ml pre-filled pen (Eli Lilly and Company Ltd)<br>5 x Insulin human (as Insulin isophane humane) 100 unit per ml = £21.70              | e | 21.70 |

Table 5 Unit costs for tests and investigations

| Test and Investigations | Details                                                     | Cost Source | Unit Cost (£) |
|-------------------------|-------------------------------------------------------------|-------------|---------------|
| Blood Gas               |                                                             | f           | 4.86          |
| Thyroid Function        |                                                             | f           | 3.02          |
| Anti TTG                | Anti-tissue Transglutaminase Antibodies test                | f           | 12.35         |
| IgA P                   | Immunoglobulin A test                                       | f           | 4.62          |
| Islet cell Antibodies   | Islet Antigen 2 Antibody                                    | f           | 23.16         |
| GAD Antibodies          | Glutamic Acid Decarboxylase Autoantibodies test (Send away) | f, g        | 22.06         |
| U&E                     | Urea and Electrolytes                                       | f           | 3.92          |
| Chest X ray             |                                                             | i           | 11.00         |
| LFT                     | Liver Function Test                                         | f           | 4.76          |
| FBC                     | Full Blood Count                                            | f           | 4.23          |
| Urine culture           |                                                             | f           | 13.60         |
| lantipo                 | Thyroid peroxidase IgG Ab                                   | f           | 3.21          |
| APTT                    | Activated Partial Thromboplastin Time test                  | f           | 3.52          |
| C Peptide               |                                                             | f           | 22.50         |
| Coeliac Screen          | IgA Tissue Transglutaminase antibody                        | f           | 12.35         |
| CRP                     | C-Reactive Protein                                          | f           | 3.21          |
| ECG                     | Electrocardiogram                                           | g           | 9.56          |
| Ferritin                |                                                             | f           | 4.71          |

|    |                                |                                                                                                                     |   |       |
|----|--------------------------------|---------------------------------------------------------------------------------------------------------------------|---|-------|
| 1  | HBA1C                          |                                                                                                                     | f | 2.42  |
| 2  | ICCP                           | Anti-MCV Antibodies                                                                                                 | f | 6.96  |
| 3  | Lipid Profile                  |                                                                                                                     | f | 3.92  |
| 4  | MRSA                           | Methicillin-resistant Staphylococcus aureus test                                                                    | f | 18.52 |
| 5  | Pancreatic Cabs                | Anti-GAD                                                                                                            | f | N/A   |
| 6  | Plasma Osmolality              |                                                                                                                     | f | 6.16  |
| 7  | Thyroid Antibodies             |                                                                                                                     | f | 3.21  |
| 8  | Amylase                        |                                                                                                                     | f | 1.35  |
| 9  | Anti TPO                       | Anti-thyroid peroxidase test                                                                                        | f | 3.21  |
| 10 | Bilirubin                      | Total                                                                                                               | f | 1.35  |
| 11 | Glucose                        |                                                                                                                     | f | 1.35  |
| 12 | Magnesium                      |                                                                                                                     | f | 1.35  |
| 13 | Others                         | Blood culture                                                                                                       | h | 7.33  |
| 14 |                                | Insulin                                                                                                             | h | 2.25  |
| 15 |                                | Sickle cell                                                                                                         | h | 8.28  |
| 16 |                                | Urine ketones                                                                                                       | h | 3.21  |
| 17 |                                | Viral titres                                                                                                        | h | 11.59 |
| 18 |                                | 3 Hydroxybutyrate                                                                                                   | h | 3.76  |
| 19 |                                | X TRT                                                                                                               | h | 4.50  |
| 20 |                                | Serum Chloride                                                                                                      | h | 1.44  |
| 21 |                                | Lactate                                                                                                             | h | 1.44  |
| 22 |                                | Bone profile                                                                                                        | h | 5.11  |
| 23 |                                | Blood film                                                                                                          | h | 6.48  |
| 24 |                                | Urine dip                                                                                                           | h | 3.50  |
| 25 |                                | Rheumatoid Factor                                                                                                   | h | 8.43  |
| 26 | Blood glucose testing strips   | Based on average cost of strips (£696.96 / 64 = £10.89)                                                             | e | 10.89 |
| 27 | Blood glucose testing cassette | Betacheck C50 cassette: 100 device = £29.98<br>Mobile cassette: 50 device = £9.99 (Assumed 50 strips unless stated) | e | 9.99  |

|                             |                                                                                       |   |       |
|-----------------------------|---------------------------------------------------------------------------------------|---|-------|
| Urine ketone testing strips | Based on average cost (2.25+3.06/2 = £2.66).                                          | e | 2.66  |
| Blood ketone testing strips | Based on average cost of ketone testing strips.                                       | e | 16.95 |
| Lancets (pack of 100)       | Based on average cost of pack of 100.                                                 | j | 3.93  |
| Lancets (pack of 204)       | FastClix (Roche Diabetes Care Ltd.)                                                   | j | 5.90  |
| Hypostop/glucogel           | GlucoGel 40% gel original (BBI Healthcare Ltd): Glucose 400mg per 1g - 75gram = £7.16 | e | 7.16  |
| Glucagon                    | Glucagon hydrochloride 1mg: 1 vial = £11.52                                           | e | 11.52 |
| Insulin needles             | Pack of 100 Safety needles 0.3ml or 0.5ml syringe and needle = £13.34                 | j | 13.34 |
| Insulin pens                | Based on average cost of insulin pens.                                                | e | 19.35 |
| Sharps bin                  | Sharpsafe 1L = £0.85.                                                                 | j | 0.85  |

#### References:

- a) NHS Improvement and NHS England. Annex A: The national tariff workbook. 2020 [Accessed 10/03/2020]. Available from: <https://improvement.nhs.uk/resources/national-tariff/>
  - b) Curtis, Lesley A. and Burns, Amanda (2019) Unit Costs of Health and Social Care 2019. Unit Costs of Health and Social Care. PSSRU, Kent, UK, 176 pp. ISBN 978-1-911353-10-2. <https://kar.kent.ac.uk/79286/1/UCFinalFeb20.pdf>
  - c) Curtis L. Unit Costs of Health and Social Care 2010. University of Kent, Canterbury: Personal Social Services Research Unit; 2010. [https://www.pssru.ac.uk/pub/uc/uc2010/uc2010\\_s10.pdf](https://www.pssru.ac.uk/pub/uc/uc2010/uc2010_s10.pdf)
  - d) Barton, J & Saunders J (2010) Discontinuation of Mixtard® 30 Insulin Products, Aneurin Bevan Health Board (August 2010) [Accessed: 10/03/2020]. Available from: <http://www.wales.nhs.uk/sites3/docopen.cfm?orgid=814&id=161224>
  - e) NICE. BNF for Children: British National Formulary. NICE; 2020 [accessed 10/03/2020]. Available from: <https://bnfc.nice.org.uk/>
  - f) Cardiff and Vale University Health Board, Biochemistry and Immunology Dept, University Hospital of Wales. (Personal communication).
  - g) (Inflated)\* NICE. Appendix M: Routine preoperative tests for elective surgery. Centre NCG; 2015 [accessed 10/03/2020]. Available from: <https://www.nice.org.uk/guidance/ng45/history/>
  - h) (Inflated)\* from previous cost supplied by 2012 Cwm Taf Health Board
  - i) Personal communication with Swansea Bay Health Board
  - j) NHS. NHS Electronic Drug Tariff. NHS Business Services Authority; 2020. <http://www.drugtariff.nhsbsa.nhs.uk/#/00774110-DC/DC00773743#d2e9682/Part%20IXA-Appliances>
- \*Costs inflated using the CCEMG-EPPI-Centre Cost Converter. Available at: <http://epi.ioe.ac.uk/costconversion/default.aspx>



Table 6 Unit costs for patient/carer borne costs

| Resource item       | Details                                                                                                                                                                          | Cost source | Unit cost (£) |
|---------------------|----------------------------------------------------------------------------------------------------------------------------------------------------------------------------------|-------------|---------------|
| Time off work       | Median weekly earnings £585 April 2019<br>Daily wage (£585 divided by 5 = £117)                                                                                                  | a           | 117.00        |
| Time off school     | Total annual spending per pupil of £5,872; Divided by the number of school days in a year (195) = a cost of £30.11 per day missed                                                | b           | 30.11         |
| Travelling by car   | AA Mileage calculator used to calculate miles travelled in 1 hour = 48.9miles.<br>Average price per mileage = £1.238.<br>Average miles per gallon = 50.5mpg.<br>= £5.44 per hour | c, d, e     | 5.44          |
| Travelling by bus   | Captured by OOP£                                                                                                                                                                 |             |               |
| Travelling by train | Captured by OOP£                                                                                                                                                                 |             |               |
| Travelling by taxi  | Captured by OOP£                                                                                                                                                                 |             |               |

## References:

- a) Office for National Statistics. Employee earnings in the UK. Office for National Statistics –; 2019 [accessed 10/03/2020]. Available from: <https://www.ons.gov.uk/employmentandlabourmarket/peopleinwork/earningsandworkinghours/bulletins/annualsurveyofhoursandearnings/2019>
- b) Belfield, C. F., C. Sibieta, L. 2018. Annual Report on Education Spending in England. In: Payne, J. ed. London: The Institute for Fiscal Studies. (2018-2019 prices).
- c) Automobile Association Developments Ltd. 2018. Mileage calculator. AA. [Accessed: 29/03/2020]. Available at: <https://www.theaa.com/driving/mileage-calculator.jsp>
- d) data.gov.uk. 2020. *Petrol and diesel prices*. Department for Business, Energy and Industrial Strategy. [Accessed: 29/03/2020]. Available at: <https://data.gov.uk/dataset/c174a981-b0f2-4b39-adc0-1d0a27a7d8c9/petrol-and-diesel-prices>

- e) RAC Foundation. 2020. *FAQs about road transport and the environment*. London. [Accessed: 29/03/2020]. Available at: <https://www.racfoundation.org/motoring-faqs/environment>

Table 7 Other Hospital Contacts

| Resource item      | Notes                                                                | Cost data source | Unit cost used (£) |
|--------------------|----------------------------------------------------------------------|------------------|--------------------|
| A&E                | Cost per A&E attendance.<br>Inflated from £160.                      | a                | 166.20             |
| ITU                | Paediatric ICU, basic critical care average cost                     | b                | 1,389.00           |
| HTU                | Paediatric HDU, basic critical care average cost                     | b                | 780.00             |
| Other ward         | PK68C CC Score 0, cost of combined day case/ordinary elective spell. | c                | 894.00             |
| Ambulance call out | See and treat and convey                                             | b                | 258.00             |

References:

- a) NHS Improvement. 2017/18 reference costs and guidance. 2018 [accessed 03/05/2020]. Available from: <https://improvement.nhs.uk/resources/reference-costs/>
- b) Curtis LAB, Amanda. Unit Costs of Health and Social Care 2019. Unit Costs of Health and Social Care. Kent, UK: PSSRU; 2019. p. 176.
- c) NHS Improvement and NHS England. Annex A: The national tariff workbook. 2020 [accessed 10/03/2020]. Available from: <https://improvement.nhs.uk/resources/national-tariff/>

Table 8 Total Costs

| Arm |
|-----|
|     |

|                                                   | Home management (n=98), mean<br>(95% CI) (£) | Hospital management (n=95), mean<br>(95% CI) (£) | Difference between Home and<br>Hospital, mean (95% CI) (£) |
|---------------------------------------------------|----------------------------------------------|--------------------------------------------------|------------------------------------------------------------|
| <b>Direct Healthcare Costs Days 0-3</b>           | 1163.43 (1078.55 to 1248.32)                 | 3386.01 (3260.81 to 3511.21)                     | -2222.58 (-2373.35 to -2071.81)                            |
| <b>Direct Healthcare Costs 24months</b>           | 5286.71 (4864.22 to 5709.20)                 | 5281.51 (4882.67 to 5680.35)                     | 5.20 (-583.51 to 593.90)                                   |
| <b>TOTAL Direct Healthcare Costs</b>              | 6450.14 (6003.52 to 6896.75)                 | 8667.52 (8255.35 to 9079.69)                     | -2217.38 (-2825.38 to -1609.38)                            |
| <b>Patient/carer Costs Days 0-3</b>               | 331.25 (279.76 to 382.74)                    | 352.21 (292.14 to 412.27)                        | -20.96 (-100.82 to 58.90)                                  |
| <b>Patient/carer Costs 24months</b>               | 1419.63 (1134.35 to 1704.91)                 | 1737.12 (1207.22 to 2267.023)                    | -317.49 (-916.19 to 281.21)                                |
| <b>TOTAL Patient/carer Costs</b>                  | 1750.88 (1447.80 to 2053.95)                 | 2089.33 (1547.32 to 2631.33)                     | -338.45 (-962.89 to 285.99)                                |
| <b>TOTAL Healthcare + Patient/carer<br/>Costs</b> | 8201.02 (7585.40 to 8816.63)                 | 10756.85 (10050.29 to 11463.41)                  | -2555.83 (-3493.73 to -1617.93)                            |

Table 9 DIRECT COSTS (NHS): Initiation Period (Days 0-3)

| Variable                              | Arm        | Observed Coef.(£) | Bootstrap Std.<br>Error.(£) | z (£)  | P> z  | Normal-based [95% CI] (£) |           |
|---------------------------------------|------------|-------------------|-----------------------------|--------|-------|---------------------------|-----------|
| <b>Contact with<br/>Diabetes Team</b> | Home       | 974.1981          | 43.22146                    | 22.54  | 0.000 | 889.4855                  | 1058.911  |
|                                       | Hospital   | 720.0925          | 31.67475                    | 22.73  | 0.000 | 658.0111                  | 782.1739  |
|                                       | Difference | 254.1055          | 54.53267                    | 4.66   | 0.000 | 147.2235                  | 360.9876  |
| <b>Other Health<br/>Professionals</b> | Home       | 0.0706122         | 0.0713645                   | 0.99   | 0.322 | -0.0692596                | 0.2104841 |
|                                       | Hospital   | 1.484211          | 1.164536                    | 1.27   | 0.202 | -0.7982382                | 3.766659  |
|                                       | Difference | -1.413598         | 1.150576                    | -1.23  | 0.219 | -3.668687                 | 0.8414902 |
| <b>Tests and<br/>Investigations</b>   | Home       | 54.93276          | 2.993705                    | 18.35  | 0.000 | 49.0652                   | 60.80031  |
|                                       | Hospital   | 61.73947          | 2.873441                    | 21.49  | 0.000 | 56.10763                  | 67.37131  |
|                                       | Difference | -6.806719         | 4.168999                    | -1.63  | 0.103 | -14.97781                 | 1.364369  |
| <b>Hospital Stay</b>                  | Home       | 0                 | -                           | -      | -     | -                         | -         |
|                                       | Hospital   | 2582.874          | 60.57222                    | 42.64  | 0.000 | 2464.154                  | 2701.593  |
|                                       | Difference | -2582.874         | 61.02397                    | -42.33 | 0.000 | -2702.478                 | -2463.269 |
| <b>Nurse Travel</b>                   | Home       | 132.685           | 13.28487                    | 9.99   | 0.000 | 106.6471                  | 158.7228  |
|                                       | Hospital   | 17.99988          | 5.292204                    | 3.40   | 0.001 | 7.627349                  | 28.37241  |

|                                |            |           |           |        |       |            |           |
|--------------------------------|------------|-----------|-----------|--------|-------|------------|-----------|
|                                | Difference | 114.6851  | 14.48314  | 7.92   | 0.000 | 86.29865   | 143.0715  |
| <b>Dietician Travel</b>        | Home       | 3.064048  | 0.9243985 | 3.31   | 0.001 | 1.252436   | 4.875659  |
|                                | Hospital   | 0.6680702 | 0.6638656 | 1.01   | 0.314 | -0.6330826 | 1.969223  |
|                                | Difference | 2.395977  | 1.152625  | 2.08   | 0.038 | 0.1368736  | 4.655081  |
| <b>Total Cost Days<br/>0-3</b> | Home       | 1163.431  | 43.30878  | 26.86  | 0.000 | 1078.548   | 1248.315  |
|                                | Hospital   | 3386.011  | 63.88057  | 53.01  | 0.000 | 3260.807   | 3511.214  |
|                                | Difference | -2222.58  | 76.92329  | -28.89 | 0.000 | -2373.346  | -2071.813 |

Table 10: DIRECT COSTS (NHS): Follow-up period (24months)

| Variable                                          | Arm        | Observed Coef.(£) | Bootstrap Std.<br>Error.(£) | z (£) | P> z  | Normal-based [95% CI] (£) |          |
|---------------------------------------------------|------------|-------------------|-----------------------------|-------|-------|---------------------------|----------|
| <b>Equipment</b>                                  | Home       | 1745.139          | 91.08601                    | 19.16 | 0.000 | 1566.614                  | 1923.665 |
|                                                   | Hospital   | 1713.707          | 86.50011                    | 19.81 | 0.000 | 1544.17                   | 1883.244 |
|                                                   | Difference | 31.43227          | 127.0783                    | 0.25  | 0.805 | -217.6366                 | 280.5012 |
| <b>Insulin</b>                                    | Home       | 457.2095          | 28.16661                    | 16.23 | 0.000 | 402.0039                  | 512.415  |
|                                                   | Hospital   | 446.1523          | 24.99017                    | 17.85 | 0.000 | 397.1725                  | 495.1322 |
|                                                   | Difference | 11.05713          | 37.82228                    | 0.29  | 0.770 | -63.07317                 | 85.18744 |
| <b>Tests and<br/>Investigations</b>               | Home       | 8.14933           | 1.362176                    | 5.98  | 0.000 | 5.479514                  | 10.81914 |
|                                                   | Hospital   | 8.225684          | 1.314776                    | 6.26  | 0.000 | 5.648771                  | 10.8026  |
|                                                   | Difference | -0.763541         | 1.8789                      | -0.04 | 0.968 | -3.75893                  | 3.606222 |
| <b>Contact with<br/>Diabetes Team<br/>(Other)</b> | Home       | 584.4067          | 42.29807                    | 13.82 | 0.000 | 501.504                   | 667.3094 |
|                                                   | Hospital   | 625.2271          | 42.95843                    | 14.55 | 0.000 | 541.0301                  | 709.4241 |
|                                                   | Difference | -40.82041         | 60.97088                    | -0.67 | 0.503 | -160.3211                 | 78.68032 |
| <b>Outpatient<br/>contacts</b>                    | Home       | 1399.871          | 28.37326                    | 49.34 | 0.000 | 1344.261                  | 1455.482 |
|                                                   | Hospital   | 1391.982          | 25.88918                    | 53.77 | 0.000 | 1341.24                   | 1442.723 |
|                                                   | Difference | 7.88985           | 38.43638                    | 0.21  | 0.837 | -67.44407                 | 83.22377 |
| <b>Other health<br/>professional</b>              | Home       | 195.0289          | 23.49622                    | 8.30  | 0.000 | 148.9771                  | 241.0806 |
|                                                   | Hospital   | 236.2501          | 30.16264                    | 7.83  | 0.000 | 177.1324                  | 295.3678 |

1  
2  
3  
4  
5  
6  
7  
8  
9  
10  
11  
12  
13  
14  
15  
16  
17  
18  
19  
20  
21  
22  
23  
24  
25  
26  
27  
28  
29  
30  
31  
32  
33  
34  
35  
36  
37  
38  
39  
40  
41  
42  
43  
44  
45  
46

|                                   |            |           |          |       |        |           |          |
|-----------------------------------|------------|-----------|----------|-------|--------|-----------|----------|
| <b>visits</b>                     | Difference | -41.22124 | 37.81442 | -1.09 | -0.276 | -115.3361 | 32.89367 |
| <b>Hospital contacts</b>          | Home       | 896.902   | 167.3965 | 5.36  | 0.000  | 568.811   | 1224.993 |
|                                   | Hospital   | 859.9642  | 156.5175 | 5.49  | 0.000  | 553.1956  | 1166.733 |
|                                   | Difference | 36.93783  | 229.64   | 0.16  | 0.872  | -413.1483 | 487.024  |
| <b>Contact with diabetes team</b> | Home       | 1984.278  | 55.09216 | 36.02 | 0.000  | 1876.299  | 2092.257 |
|                                   | Hospital   | 2017.209  | 51.92769 | 38.85 | 0.000  | 1915.432  | 2118.985 |
|                                   | Difference | -32.93056 | 76.1765  | -0.43 | 0.666  | -182.2338 | 116.3726 |
| <b>Total Cost of Follow-up</b>    | Home       | 5287.707  | 215.5606 | 24.53 | 0.000  | 4864.216  | 5709.198 |
|                                   | Hospital   | 5281.508  | 203.492  | 25.95 | 0.000  | 4882.671  | 5680.345 |
|                                   | Difference | 5.199081  | 300.3655 | 0.02  | 0.986  | -583.5064 | 593.9046 |

Table 11: INDIRECT COSTS (patient/carer): Initiation period (days 0-3)

| Variable                      | Arm        | Observed Coef.(£) | Bootstrap Std. Error.(£) | z (£) | P> z  | Normal-based [95% CI] (£) |           |
|-------------------------------|------------|-------------------|--------------------------|-------|-------|---------------------------|-----------|
| <b>Days off work</b>          | Home       | 250.2835          | 23.97491                 | 10.44 | 0.000 | 203.2935                  | 297.2735  |
|                               | Hospital   | 255.5526          | 27.93019                 | 9.15  | 0.000 | 200.8105                  | 310.2948  |
|                               | Difference | -5.269126         | 36.57225                 | -0.14 | 0.885 | -76.94942                 | 66.41117  |
| <b>Travel</b>                 | Home       | 10.65095          | 0.7721741                | 13.79 | 0.000 | 9.137514                  | 12.16438  |
|                               | Hospital   | 18.31467          | 1.461535                 | 12.53 | 0.000 | 15.45011                  | 21.17922  |
|                               | Difference | -7.663719         | 1.651384                 | -4.64 | 0.000 | -10.90037                 | -4.427066 |
| <b>Out of pocket expenses</b> | Home       | 8.366368          | 0.8257938                | 10.13 | 0.000 | 6.747842                  | 9.984894  |
|                               | Hospital   | 22.25256          | 2.66553                  | 8.35  | 0.000 | 17.02821                  | 27.4769   |
|                               | Difference | -13.8619          | 2.776957                 | -5.00 | 0.000 | -19.32892                 | -8.443455 |
| <b>Days off school</b>        | Home       | 65.49701          | 4.75125                  | 13.79 | 0.000 | 56.18473                  | 74.80929  |
|                               | Hospital   | 57.05053          | 5.086391                 | 11.22 | 0.000 | 47.08138                  | 67.01967  |
|                               | Difference | 8.446484          | 7.034962                 | 1.20  | 0.230 | -5.341788                 | 22.23476  |

|                                |            |           |          |       |       |           |          |
|--------------------------------|------------|-----------|----------|-------|-------|-----------|----------|
| <b>Total Cost Days<br/>0-3</b> | Home       | 331.2495  | 26.2718  | 12.61 | 0.000 | 279.7578  | 382.7413 |
|                                | Hospital   | 352.2065  | 30.64495 | 11.49 | 0.000 | 292.1435  | 412.2695 |
|                                | Difference | -20.95692 | 40.74511 | -0.51 | 0.607 | -100.8159 | 58.90204 |

Table 12: INDIRECT COSTS (patient/carer): Follow-up period (24months)

| Variable                        | Arm        | Observed Coef.(£) | Bootstrap Std. Error.(£) | z (£) | P> z  | Normal-based [95% CI] (£) |          |
|---------------------------------|------------|-------------------|--------------------------|-------|-------|---------------------------|----------|
| <b>Days off work</b>            | Home       | 868.5459          | 132.2863                 | 6.57  | 0.000 | 609.2696                  | 1127.822 |
|                                 | Hospital   | 1180.468          | 255.6274                 | 4.62  | 0.000 | 679.4479                  | 1681.489 |
|                                 | Difference | -311.9225         | 285.404                  | -1.09 | 0.274 | -871.304                  | 247.459  |
| <b>Travel</b>                   | Home       | 63.39265          | 3.821086                 | 16.59 | 0.000 | 55.90346                  | 70.88184 |
|                                 | Hospital   | 60.58442          | 5.881266                 | 10.30 | 0.000 | 49.05735                  | 72.11149 |
|                                 | Difference | 2.808232          | 7.079617                 | 0.40  | 0.692 | -11.06756                 | 16.68403 |
| <b>Out of pocket expenses</b>   | Home       | 44.33534          | 6.17581                  | 7.18  | 0.000 | 32.23098                  | 56.43971 |
|                                 | Hospital   | 41.88275          | 6.181821                 | 6.78  | 0.000 | 29.76661                  | 53.9989  |
|                                 | Difference | 2.452587          | 8.848013                 | 0.28  | 0.782 | -14.8892                  | 19.79437 |
| <b>Days off school</b>          | Home       | 443.3544          | 40.85612                 | 10.85 | 0.000 | 363.2779                  | 523.4309 |
|                                 | Hospital   | 454.1856          | 53.69218                 | 8.46  | 0.000 | 348.9508                  | 559.4203 |
|                                 | Difference | -10.83119         | 67.59177                 | -0.16 | 0.873 | -143.3086                 | 121.6462 |
| <b>Total Costs of Follow-up</b> | Home       | 1419.628          | 145.554                  | 9.75  | 0.000 | 1134.348                  | 1704.909 |
|                                 | Hospital   | 1737.121          | 270.3629                 | 6.43  | 0.000 | 1207.22                   | 2267.023 |
|                                 | Difference | -317.4929         | 305.4638                 | -1.04 | 0.299 | -916.1909                 | 281.2051 |

Table 13: Total Costs

| Variable                                | Arm        | Observed Coef.(£) | Bootstrap Std. Error.(£) | z (£) | P> z  | Normal-based [95% CI] (£) |           |
|-----------------------------------------|------------|-------------------|--------------------------|-------|-------|---------------------------|-----------|
| <b>Patient/carer Total Cost</b>         | Home       | 1750.878          | 154.6333                 | 11.32 | 0.000 | 1447.802                  | 2053.954  |
|                                         | Hospital   | 2089.328          | 276.5388                 | 7.56  | 0.000 | 1547.322                  | 2631.334  |
|                                         | Difference | -338.4498         | 318.5954                 | -1.06 | 0.288 | -962.8854                 | 285.9858  |
| <b>Direct Healthcare Total Cost</b>     | Home       | 6450.138          | 227.8686                 | 28.31 | 0.000 | 6003.524                  | 6896.753  |
|                                         | Hospital   | 8867.519          | 210.293                  | 41.22 | 0.000 | 8255.352                  | 9079.686  |
|                                         | Difference | -2217.38          | 310.2097                 | -7.15 | 0.000 | -2825.38                  | -1609.381 |
| <b>Total Healthcare + Patient/carer</b> | Home       | 8201.016          | 314.0942                 | 26.11 | 0.000 | 7585.403                  | 8816.63   |
|                                         | Hospital   | 10756.85          | 360.4966                 | 29.84 | 0.000 | 10050.29                  | 11463.41  |
|                                         | Difference | -2555.83          | 478.5273                 | -5.34 | 0.000 | -3493.727                 | -1617.934 |

Table 14 ICER of Direct Healthcare Costs

|                                                                  | <b>Coefficient</b> | <b>95% CI</b>          | <b>P&gt; z </b> |
|------------------------------------------------------------------|--------------------|------------------------|-----------------|
| <b>Difference in cost (£)</b>                                    | -2182.289          | -2783.101 to -1581.477 | <0.001          |
| <b>Difference in HbA1c (mmol/mol)</b>                            | -0.294             | -6.282 to 5.695        | 0.923           |
| <b>ICER (£ saved per additional mmol/mol reduction in HbA1c)</b> | <b>7434.334</b>    | -73368.77 to 88236.77  | 0.857           |

Table 15 ICER of healthcare + non-healthcare costs

|                                                                  | <b>Coefficient</b> | <b>95% CI</b>          | <b>P&gt; z </b> |
|------------------------------------------------------------------|--------------------|------------------------|-----------------|
| <b>Difference in cost (£)</b>                                    | -2520.199          | -3464.697 to -1575.701 | <0.001          |
| <b>Difference in HbA1c (mmol/mol)</b>                            | -0.294             | -6.282 to 5.695        | 0.923           |
| <b>ICER (£ saved per additional mmol/mol reduction in HbA1c)</b> | <b>8585.48</b>     | -91610.05 to 108781    | 0.867           |

Table 16 Sensitivity Analyses

|                                                                  | <b>Coefficient</b> | <b>95% CI</b>         | <b>P&gt; z </b> |
|------------------------------------------------------------------|--------------------|-----------------------|-----------------|
| <b>Difference in cost (£)</b>                                    | -1600.113          | -2197.857 to -1002.37 | <0.001          |
| <b>Difference in HbA1c (mmol/mol)</b>                            | -0.294             | -6.282 to 5.695       | 0.923           |
| <b>ICER (£ saved per additional mmol/mol reduction in HbA1c)</b> | <b>5451.055</b>    | -57926.34 to 68828.45 | 0.866           |



Figure 1

(a)

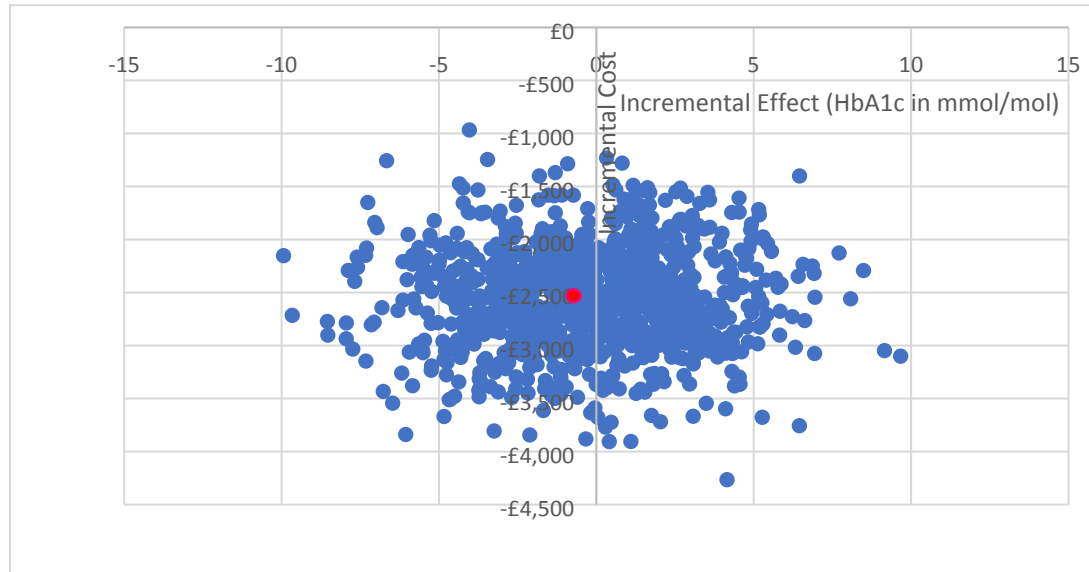

(b)

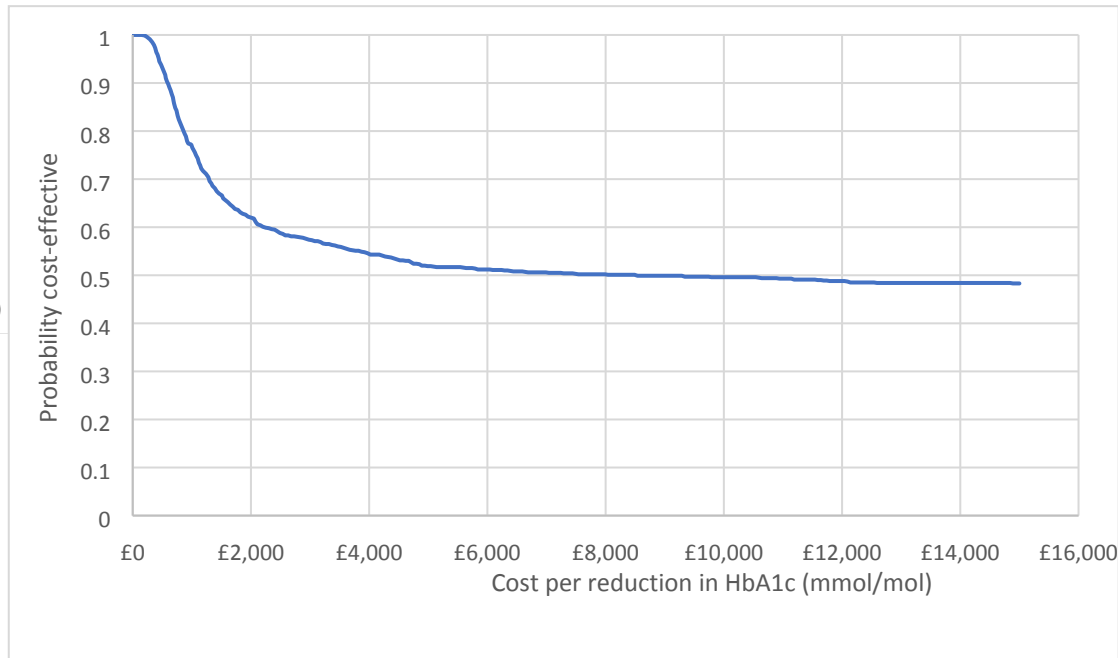

(a)

(

(l

o

F

(b)

15

1  
2  
3  
4  
5  
6  
7  
8  
9  
10  
11  
12  
13  
14  
15  
16  
17  
18  
19  
20  
21  
22  
23  
24  
25  
26  
27  
28  
29  
30  
31  
32  
33  
34  
35  
36  
37  
38  
39  
40  
41  
42  
43  
44  
45  
46  
47  
48  
49  
50  
51  
52  
53  
54  
55  
56  
57  
58  
59  
60

For p

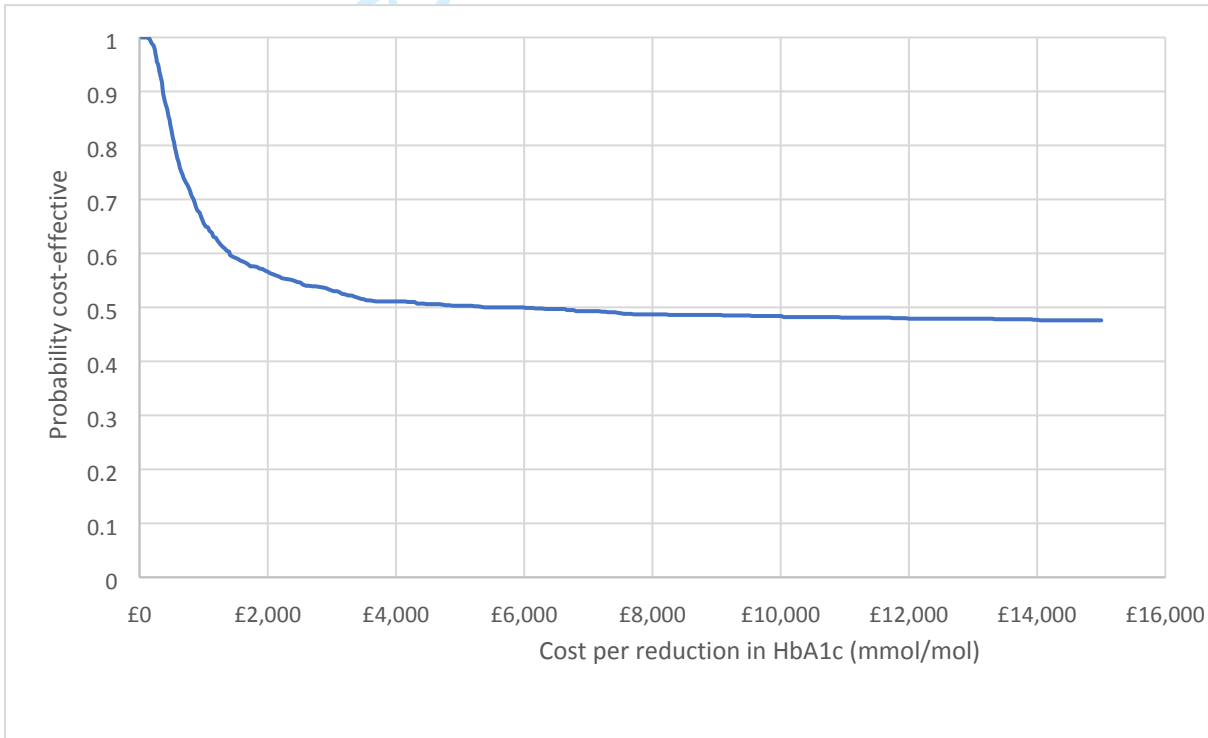

**(a) Cost-effectiveness plane of healthcare costs with sensitivity analysis.** Reduction in HbA1c represents improvement.

● = point estimate ICER £5,451.055 saved per additional mmol/mol reduction of HbA1c (-0.294, -£1,600.113)

**(b) Cost-effectiveness acceptability curve for Direct Healthcare Costs with sensitivity analysis.** Represents the probability of home management being cost-effective at different willingness to pay thresholds.

Table 17 Cost Consequences Analysis (CCA)

| Costs and Consequences                   | Arm |                                       |    |                                           | Difference between Home and Hospital, mean (95% CI) (£) | P value |
|------------------------------------------|-----|---------------------------------------|----|-------------------------------------------|---------------------------------------------------------|---------|
|                                          | N   | Home management, mean (95% CI/SD) (£) | N  | Hospital management, mean (95% CI/SD) (£) |                                                         |         |
| <b>Costs Impact</b>                      |     |                                       |    |                                           |                                                         |         |
| <b>TOTAL Direct Healthcare Costs</b>     | 98  | £6450.14<br>(£6003.52 to £6896.75)    | 95 | £8667.52<br>(£8255.35 to £9079.69)        | -£2217.38<br>(-£2825.38 to -£1609.38)                   | <0.05   |
| <b>TOTAL Patient/Carer Costs</b>         | 98  | £1750.88<br>(£1447.80 to £2053.95)    | 95 | £2089.33<br>(£1547.32 to £2631.33)        | -£338.45<br>(-£962.89 to £285.99)                       | 0.288   |
| <b>TOTAL NHS + Patient/Carer Costs</b>   | 98  | £8201.02<br>(£7585.40 to £8816.63)    | 95 | £10756.85<br>(£10050.29 to 11463.41)      | -£2555.83<br>(-£3493.73 to -£1617.93)                   | <0.05   |
| <b>Health Impact</b>                     |     |                                       |    |                                           |                                                         |         |
| <b>HbA1c 24months (mmol/mol)*</b>        | 98  | 72.1 (SD = 21.7)                      | 95 | 72.6 (SD = 21.9)                          | 1.01<br>(0.93 to 1.09)                                  | 0.863   |
| <b>Physical Impact</b>                   |     |                                       |    |                                           |                                                         |         |
| <b>Physical well-being at 1month**</b>   | 68  | 63.0 (SD = 20.38)                     | 62 | 70.4 (SD = 19.07)                         | -7.5<br>(-14.3 to -0.6)                                 | 0.033   |
| <b>Physical well-being at 24months**</b> | 62  | 70.0 (SD = 17.64)                     | 58 | 71.0 (SD = 15.90)                         | -1.0<br>(-7.1 to 5.1)                                   | 0.741   |
| <b>Symptoms at 1 month***</b>            | 69  | 60.2 (SD = 14.23)                     | 62 | 62.3 (SD = 13.09)                         | -2.1<br>(-6.8 to 2.6)                                   | 0.384   |
| <b>Symptoms at 24months***</b>           | 62  | 62.0 (SD = 12.56)                     | 58 | 63.3 (SD = 14.11)                         | -1.2<br>(-5.9 to 3.6)                                   | 0.633   |
| <b>Psychological Impact</b>              |     |                                       |    |                                           |                                                         |         |
| <b>Worry at 1month***</b>                | 68  | 72.7 (SD = 24.26)                     | 63 | 74.7 (SD = 22.94)                         | -2.1<br>(-10.2 to 6.1)                                  | 0.616   |

|                                   |    |                   |    |                   |                          |       |
|-----------------------------------|----|-------------------|----|-------------------|--------------------------|-------|
| Worry at 24months***              | 62 | 73.3 (SD = 20.75) | 58 | 71.1 (SD = 23.74) | 2.1<br>(-5.9 to 10.2)    | 0.601 |
| Emotional wellbeing at 1month**   | 68 | 75.5 (SD = 17.98) | 61 | 77.6 (SD = 15.31) | -2.2<br>(-8.0 to 3.7)    | 0.464 |
| Emotional wellbeing at 24months** | 62 | 76.6 (SD = 18.18) | 58 | 78.6 (SD = 12.35) | -2.0<br>(-7.7 to 3.6)    | 0.482 |
| Self-esteem at 1month**           | 68 | 53.9 (SD = 24.19) | 61 | 64.1 (SD = 21.22) | -10.4<br>(-18.3 to -2.4) | 0.011 |
| Self-esteem at 24months**         | 62 | 63.4 (SD = 19.92) | 58 | 56.1 (SD = 18.71) | 7.2<br>(0.2 to 14.2)     | 0.043 |
| <b>Social Impact</b>              |    |                   |    |                   |                          |       |
| Communication at 1month***        | 68 | 72.9 (SD = 28.01) | 63 | 81.3 (SD = 18.25) | -8.4<br>(-16.7 to -0.2)  | 0.045 |
| Communication at 24months***      | 62 | 72.8 (SD = 25.83) | 58 | 78.2 (SD = 21.22) | -5.5<br>(-14.0 to 3.0)   | 0.200 |
| Family at 1month**                | 69 | 76.0 (SD = 17.61) | 61 | 79.7 (SD = 18.10) | -3.7<br>(-9.9 to 2.5)    | 0.242 |
| Family at 24months**              | 61 | 79.3 (SD = 17.81) | 58 | 77.9 (SD = 19.15) | 1.5<br>(-5.1 to 8.2)     | 0.507 |
| Friends at 1month**               | 69 | 79.3 (SD = 14.62) | 60 | 78.6 (SD = 16.33) | 0.5<br>(-4.8 to 5.9)     | 0.849 |
| Friends at 24months**             | 60 | 79.5 (SD = 17.03) | 58 | 77.4 (SD = 16.81) | 2.1<br>(-4.1 to 8.2)     | 0.507 |
| School at 1month**                | 65 | 67.0 (SD = 21.92) | 60 | 68.1 (SD = 18.65) | -1.1<br>(-8.3 to 6.1)    | 0.763 |
| School at 24months**              | 60 | 65.9 (SD = 17.32) | 57 | 61.5 (SD = 18.14) | 4.6<br>(-1.9 to 11.0)    | 0.163 |

\*Controlled for HbA1c at baseline. \*\*KINDL-R – parent answers about child; higher score is better. \*\*\*PedsQL 3.0 Diabetes Module – parent answers about child.

# Reporting checklist for economic evaluation of health interventions.

Based on the CHEERS guidelines.

## Instructions to authors

Complete this checklist by entering the page numbers from your manuscript where readers will find each of the items listed below.

Your article may not currently address all the items on the checklist. Please modify your text to include the missing information. If you are certain that an item does not apply, please write "n/a" and provide a short explanation.

Upload your completed checklist as an extra file when you submit to a journal.

In your methods section, say that you used the CHEERS reporting guidelines, and cite them as:

Husereau D, Drummond M, Petrou S, Carswell C, Moher D, Greenberg D, Augustovski F, Briggs AH, Mauskopf J, Loder E. Consolidated Health Economic Evaluation Reporting Standards (CHEERS) statement.

|              |                                                                                                                                                                                   | Page   |
|--------------|-----------------------------------------------------------------------------------------------------------------------------------------------------------------------------------|--------|
|              | Reporting Item                                                                                                                                                                    | Number |
| <b>Title</b> | <p><a href="#">#1</a> Identify the study as an economic evaluation or use more specific terms such as “cost-effectiveness analysis”, and describe the interventions compared.</p> | 1      |

## Abstract

[#2](#) Provide a structured summary of objectives, perspective, setting, methods (including study design and inputs), results (including base case and uncertainty analyses), and conclusions

## Introduction

[#3](#) Provide an explicit statement of the broader context for the study. Present the study question and its relevance for health policy or practice decisions

## Methods

[#4](#) Describe characteristics of the base case population and subgroups analysed, including why they were chosen.

[#5](#) State relevant aspects of the system(s) in which the decision(s) need(s) to be made.

[#6](#) Describe the perspective of the study and relate this to the costs being evaluated.

[#7](#) Describe the interventions or strategies being compared and state why they were chosen.

[#8](#) State the time horizon(s) over which costs and consequences are being evaluated and say why appropriate.

|    |                  |                      |                                                           |     |
|----|------------------|----------------------|-----------------------------------------------------------|-----|
| 1  | Discount rate    | <a href="#">#9</a>   | Report the choice of discount rate(s) used for costs and  | 4   |
| 2  |                  |                      | outcomes and say why appropriate                          |     |
| 3  |                  |                      |                                                           |     |
| 4  |                  |                      |                                                           |     |
| 5  |                  |                      |                                                           |     |
| 6  | Choice of health | <a href="#">#10</a>  | Describe what outcomes were used as the measure(s)        | 5   |
| 7  | outcomes         |                      | of benefit in the evaluation and their relevance for the  |     |
| 8  |                  |                      | type of analysis performed                                |     |
| 9  |                  |                      |                                                           |     |
| 10 |                  |                      |                                                           |     |
| 11 |                  |                      |                                                           |     |
| 12 |                  |                      |                                                           |     |
| 13 |                  |                      |                                                           |     |
| 14 | Measurement of   | <a href="#">#11a</a> | Single study-based estimates: Describe fully the design   | 6   |
| 15 | effectiveness    |                      | features of the single effectiveness study and why the    |     |
| 16 |                  |                      | single study was a sufficient source of clinical          |     |
| 17 |                  |                      | effectiveness data                                        |     |
| 18 |                  |                      |                                                           |     |
| 19 |                  |                      |                                                           |     |
| 20 |                  |                      |                                                           |     |
| 21 |                  |                      |                                                           |     |
| 22 |                  |                      |                                                           |     |
| 23 |                  |                      |                                                           |     |
| 24 | Measurement of   | <a href="#">#11b</a> | Synthesis-based estimates: Describe fully the methods     | N/A |
| 25 | effectiveness    |                      | used for identification of included studies and synthesis |     |
| 26 |                  |                      | of clinical effectiveness data                            |     |
| 27 |                  |                      |                                                           |     |
| 28 |                  |                      |                                                           |     |
| 29 |                  |                      |                                                           |     |
| 30 |                  |                      |                                                           |     |
| 31 |                  |                      |                                                           |     |
| 32 | Measurement and  | <a href="#">#12</a>  | If applicable, describe the population and methods used   | N/A |
| 33 | valuation of     |                      | to elicit preferences for outcomes.                       |     |
| 34 | preference based |                      |                                                           |     |
| 35 | outcomes         |                      |                                                           |     |
| 36 |                  |                      |                                                           |     |
| 37 |                  |                      |                                                           |     |
| 38 |                  |                      |                                                           |     |
| 39 |                  |                      |                                                           |     |
| 40 |                  |                      |                                                           |     |
| 41 | **Estimating     |                      |                                                           |     |
| 42 | resources        |                      |                                                           |     |
| 43 |                  |                      |                                                           |     |
| 44 |                  |                      |                                                           |     |
| 45 |                  |                      |                                                           |     |
| 46 |                  |                      |                                                           |     |
| 47 | and costs **     |                      |                                                           |     |
| 48 |                  |                      |                                                           |     |
| 49 |                  |                      |                                                           |     |
| 50 |                  | <a href="#">#13a</a> | Single study-based economic evaluation: Describe          | 5   |
| 51 |                  |                      | approaches used to estimate resource use associated       |     |
| 52 |                  |                      | with the alternative interventions. Describe primary or   |     |
| 53 |                  |                      | secondary research methods for valuing each resource      |     |
| 54 |                  |                      |                                                           |     |
| 55 |                  |                      |                                                           |     |
| 56 |                  |                      |                                                           |     |
| 57 |                  |                      |                                                           |     |
| 58 |                  |                      |                                                           |     |
| 59 |                  |                      |                                                           |     |
| 60 |                  |                      |                                                           |     |

item in terms of its unit cost. Describe any adjustments made to approximate to opportunity costs

## Methods

|                                             |                             |                                                                                                                                                                                                                                                                                                                             |            |
|---------------------------------------------|-----------------------------|-----------------------------------------------------------------------------------------------------------------------------------------------------------------------------------------------------------------------------------------------------------------------------------------------------------------------------|------------|
| <p>Estimating resources and costs</p>       | <p><a href="#">#13b</a></p> | <p>Model-based economic evaluation: Describe approaches and data sources used to estimate resource use associated with model health states. Describe primary or secondary research methods for valuing each resource item in terms of its unit cost. Describe any adjustments made to approximate to opportunity costs.</p> | <p>N/A</p> |
| <p>Currency, price date, and conversion</p> | <p><a href="#">#14</a></p>  | <p>Report the dates of the estimated resource quantities and unit costs. Describe methods for adjusting estimated unit costs to the year of reported costs if necessary. Describe methods for converting costs into a common currency base and the exchange rate.</p>                                                       | <p>5</p>   |
| <p>Choice of model</p>                      | <p><a href="#">#15</a></p>  | <p>Describe and give reasons for the specific type of decision analytical model used. Providing a figure to show model structure is strongly recommended.</p>                                                                                                                                                               | <p>5</p>   |
| <p>Assumptions</p>                          | <p><a href="#">#16</a></p>  | <p>Describe all structural or other assumptions underpinning the decision-analytical model.</p>                                                                                                                                                                                                                             | <p>5</p>   |
| <p>Analytical methods</p>                   | <p><a href="#">#17</a></p>  | <p>Describe all analytical methods supporting the evaluation. This could include methods for dealing with skewed, missing, or censored data; extrapolation methods; methods for pooling data; approaches to validate or make adjustments (such as half cycle</p>                                                            | <p>6</p>   |



1 corrections) to a model; and methods for handling  
 2  
 3 population heterogeneity and uncertainty.  
 4

## 5 Results

|    |                       |                      |                                                              |
|----|-----------------------|----------------------|--------------------------------------------------------------|
| 6  |                       |                      |                                                              |
| 7  |                       |                      |                                                              |
| 8  |                       |                      |                                                              |
| 9  | Study parameters      | <a href="#">#18</a>  | Report the values, ranges, references, and, if used, 8       |
| 10 |                       |                      |                                                              |
| 11 |                       |                      | probability distributions for all parameters. Report         |
| 12 |                       |                      | reasons or sources for distributions used to represent       |
| 13 |                       |                      | uncertainty where appropriate. Providing a table to show     |
| 14 |                       |                      | the input values is strongly recommended.                    |
| 15 |                       |                      |                                                              |
| 16 |                       |                      |                                                              |
| 17 |                       |                      |                                                              |
| 18 |                       |                      |                                                              |
| 19 |                       |                      |                                                              |
| 20 |                       |                      |                                                              |
| 21 | Incremental costs and | <a href="#">#19</a>  | For each intervention, report mean values for the main 8     |
| 22 |                       |                      |                                                              |
| 23 | outcomes              |                      | categories of estimated costs and outcomes of interest,      |
| 24 |                       |                      | as well as mean differences between the comparator           |
| 25 |                       |                      | groups. If applicable, report incremental cost-              |
| 26 |                       |                      | effectiveness ratios.                                        |
| 27 |                       |                      |                                                              |
| 28 |                       |                      |                                                              |
| 29 |                       |                      |                                                              |
| 30 |                       |                      |                                                              |
| 31 |                       |                      |                                                              |
| 32 |                       |                      |                                                              |
| 33 | Characterising        | <a href="#">#20a</a> | Single study-based economic evaluation: Describe the 8       |
| 34 |                       |                      |                                                              |
| 35 | uncertainty           |                      | effects of sampling uncertainty for the estimated            |
| 36 |                       |                      | incremental cost and incremental effectiveness               |
| 37 |                       |                      | parameters, together with the impact of methodological       |
| 38 |                       |                      | assumptions (such as discount rate, study perspective).      |
| 39 |                       |                      |                                                              |
| 40 |                       |                      |                                                              |
| 41 |                       |                      |                                                              |
| 42 |                       |                      |                                                              |
| 43 |                       |                      |                                                              |
| 44 |                       |                      |                                                              |
| 45 | Characterising        | <a href="#">#20b</a> | Model-based economic evaluation: Describe the effects N/A    |
| 46 |                       |                      |                                                              |
| 47 | uncertainty           |                      | on the results of uncertainty for all input parameters, and  |
| 48 |                       |                      | uncertainty related to the structure of the model and        |
| 49 |                       |                      | assumptions.                                                 |
| 50 |                       |                      |                                                              |
| 51 |                       |                      |                                                              |
| 52 |                       |                      |                                                              |
| 53 |                       |                      |                                                              |
| 54 |                       |                      |                                                              |
| 55 | Characterising        | <a href="#">#21</a>  | If applicable, report differences in costs, outcomes, or N/A |
| 56 |                       |                      |                                                              |
| 57 | heterogeneity         |                      | cost effectiveness that can be explained by variations       |
| 58 |                       |                      |                                                              |
| 59 |                       |                      |                                                              |
| 60 |                       |                      |                                                              |

1 between subgroups of patients with different baseline  
 2 characteristics or other observed variability in effects that  
 3 are not reducible by more information.  
 4  
 5  
 6  
 7

## 8 Discussion

9  
 10  
 11 Study findings, [#22](#) Summarise key study findings and describe how they 15  
 12 limitations, support the conclusions reached. Discuss limitations and  
 13 generalisability, and the generalisability of the findings and how the findings  
 14 current knowledge fit with current knowledge.  
 15  
 16  
 17  
 18  
 19  
 20

## 21 Other

22  
 23  
 24 Source of funding [#23](#) Describe how the study was funded and the role of the 17  
 25 funder in the identification, design, conduct, and  
 26 reporting of the analysis. Describe other non-monetary  
 27 sources of support  
 28  
 29  
 30  
 31  
 32  
 33

34 Conflict of interest [#24](#) Describe any potential for conflict of interest of study 17  
 35 contributors in accordance with journal policy. In the  
 36 absence of a journal policy, we recommend authors  
 37 comply with International Committee of Medical Journal  
 38 Editors recommendations  
 39  
 40  
 41  
 42  
 43  
 44  
 45

46 None The CHEERS checklist is distributed under the terms of the Creative Commons Attribution  
 47 License CC-BY-NC. This checklist can be completed online using <https://www.goodreports.org/>, a  
 48 tool made by the [EQUATOR Network](#) in collaboration with [Penelope.ai](#)  
 49  
 50  
 51  
 52  
 53  
 54  
 55  
 56  
 57  
 58  
 59  
 60

# BMJ Open

## Cost-effectiveness of home versus hospital management of children at onset of Type 1 Diabetes: The DECIDE randomised controlled trial

|                                 |                                                                                                                                                                                                                                                                                                                                                                                                                                                                                                        |
|---------------------------------|--------------------------------------------------------------------------------------------------------------------------------------------------------------------------------------------------------------------------------------------------------------------------------------------------------------------------------------------------------------------------------------------------------------------------------------------------------------------------------------------------------|
| Journal:                        | <i>BMJ Open</i>                                                                                                                                                                                                                                                                                                                                                                                                                                                                                        |
| Manuscript ID                   | bmjopen-2020-043523.R1                                                                                                                                                                                                                                                                                                                                                                                                                                                                                 |
| Article Type:                   | Original research                                                                                                                                                                                                                                                                                                                                                                                                                                                                                      |
| Date Submitted by the Author:   | 01-Apr-2021                                                                                                                                                                                                                                                                                                                                                                                                                                                                                            |
| Complete List of Authors:       | McCarroll, Zoe; Cardiff University, School of Medicine<br>Townson, J; Cardiff University, Centre for Trials Research<br>Pickles, Timothy; Cardiff University, Centre for Trials Research<br>Gregory, John; Cardiff University School of Medicine, School of Medicine<br>Playle, Rebecca; Cardiff University, Centre for Trials Research<br>Robling, Michael; Cardiff University, Centre for Trials Research<br>Hughes, Dyfrig; Bangor University, Centre for Health Economics and Medicines Evaluation |
| <b>Primary Subject Heading</b>: | Health economics                                                                                                                                                                                                                                                                                                                                                                                                                                                                                       |
| Secondary Subject Heading:      | Diabetes and endocrinology                                                                                                                                                                                                                                                                                                                                                                                                                                                                             |
| Keywords:                       | HEALTH ECONOMICS, DIABETES & ENDOCRINOLOGY, Paediatric endocrinology < DIABETES & ENDOCRINOLOGY                                                                                                                                                                                                                                                                                                                                                                                                        |
|                                 |                                                                                                                                                                                                                                                                                                                                                                                                                                                                                                        |

SCHOLARONE™  
Manuscripts



I, the Submitting Author has the right to grant and does grant on behalf of all authors of the Work (as defined in the below author licence), an exclusive licence and/or a non-exclusive licence for contributions from authors who are: i) UK Crown employees; ii) where BMJ has agreed a CC-BY licence shall apply, and/or iii) in accordance with the terms applicable for US Federal Government officers or employees acting as part of their official duties; on a worldwide, perpetual, irrevocable, royalty-free basis to BMJ Publishing Group Ltd ("BMJ") its licensees and where the relevant Journal is co-owned by BMJ to the co-owners of the Journal, to publish the Work in this journal and any other BMJ products and to exploit all rights, as set out in our [licence](#).

The Submitting Author accepts and understands that any supply made under these terms is made by BMJ to the Submitting Author unless you are acting as an employee on behalf of your employer or a postgraduate student of an affiliated institution which is paying any applicable article publishing charge ("APC") for Open Access articles. Where the Submitting Author wishes to make the Work available on an Open Access basis (and intends to pay the relevant APC), the terms of reuse of such Open Access shall be governed by a Creative Commons licence – details of these licences and which [Creative Commons](#) licence will apply to this Work are set out in our licence referred to above.

Other than as permitted in any relevant BMJ Author's Self Archiving Policies, I confirm this Work has not been accepted for publication elsewhere, is not being considered for publication elsewhere and does not duplicate material already published. I confirm all authors consent to publication of this Work and authorise the granting of this licence.

**Title:** Cost-effectiveness of home versus hospital management of children at onset of Type 1 Diabetes: The DECIDE randomised controlled trial

**Authors:** Zoe McCarroll<sup>1</sup>, Julia Townson<sup>2</sup>, Tim Pickles<sup>3</sup>, John W Gregory<sup>4</sup>, Rebecca Playle<sup>5</sup>, Michael Robling<sup>6</sup>, Dyfrig Hughes<sup>7</sup>

\*Corresponding Author:

<sup>2</sup>Dr Julia Townson,  
Senior Research Fellow,  
Centre for Trials Research,  
College of Biomedical & Life Sciences,  
Cardiff University,  
4<sup>th</sup> Floor Neuadd Meirionnydd,  
Heath Park,  
Cardiff,  
CF14 4YS.

Email: [townson@cf.ac.uk](mailto:townson@cf.ac.uk)

<sup>1</sup>Zoe McCarroll, School of Medicine, Cardiff University, Heath Park, Cardiff, CF14 4XN.

<sup>3</sup>Tim Pickles, Research Associate in Statistics, Centre for Trials Research, College of Biomedical & Life Sciences, Cardiff University, 4<sup>th</sup> Floor, Neuadd Meirionnydd, Heath Park, Cardiff, CF14 4YS

<sup>4</sup>Professor John W Gregory, Professor in Paediatric Endocrinology, Division of Population Medicine, School of Medicine, Cardiff University, Heath Park, Cardiff, CF14 4XN.

<sup>5</sup>Dr Rebecca Playle, Senior Lecturer in Statistics, Centre for Trials Research, College of Biomedical & Life Sciences, Cardiff University, 4<sup>th</sup> Floor, Neuadd Meirionnydd, Heath Park, Cardiff, CF14 4YS.

<sup>6</sup>Professor Mike Robling, Director of Population Health Trials, Centre for Trial Research, College of Biomedical & Life Sciences, Cardiff University, 7<sup>th</sup> Floor, Neuadd Meirionnydd, Heath Park, Cardiff, CF14 4YS.

<sup>7</sup>Professor Dyfrig A Hughes, Centre for Health Economics and Medicines Evaluation, Bangor University, Bangor, Gwynedd, LL57 2PZ.

**Short running title:** The DECIDE RCT health economics

**Word count manuscript:** 3626

**MeSH key words:** Type 1 diabetes; cost-effectiveness; diagnosis; children; home; initial management

## ABSTRACT

**Objective** The aim of this economic evaluation was to assess whether home management could represent a cost-effective strategy in the patient pathway of Type 1 diabetes (T1D). This is based on the DECIDE trial (ISRCTN78114042), which compared home versus hospital management from diagnosis in childhood diabetes and found no statistically significant difference in glycaemic control at 24 months.

**Design** Cost-effectiveness analysis alongside a randomised controlled trial.

**Setting** Eight paediatric diabetes centres in England, Wales and Northern Ireland.

**Participants** 203 clinically well children aged under 17 years, with newly diagnosed type 1 diabetes and their carers.

**Outcome measures** The base case analysis adopted an NHS perspective. A scenario analysis assessed costs from a broader societal perspective. The incremental cost-effectiveness ratio (ICER) expressed as cost per mmol/mol reduction in HbA1c, was based on the mean difference in costs between the home and hospital groups, divided by mean differences in effectiveness (HbA1c). Uncertainty was considered in terms of the probability of cost-effectiveness.

**Results** At 24 months post-intervention, the base case analysis showed a difference in costs between home and hospital, in favour of home management (mean difference -£2,217; 95% CI -£2,825 to -£1,609;  $p < 0.001$ ). Home care dominated, with an ICER of £7,434 (saved) per mmol/mol reduction of HbA1c. The results of the scenario analysis also favoured home management. The greatest driver of cost differences was hospitalisation during the initiation period.

**Conclusions** Home management from diagnosis of children with T1D who are medically stable represents a less costly approach for the NHS in the UK, without impacting clinical effectiveness.

### Strengths and limitations of this study

- Cost-effectiveness analysis based on a randomised controlled trial, using patient-level data on resource use, collected prospectively.
- Methods were consistent with the NICE reference case, as recommended for the NHS in the UK.
- Quality-adjusted life years were not used as the health outcome and therefore interpretation of cost-effectiveness is more challenging.
- Cost-effectiveness was assessed over the trial period only; lifetime extrapolation was not performed to identify long-term costs and benefits.
- Clinical practice has evolved since the trial commenced and consequently resource use and costs will have changed.

**Trial registration number** ISRCTN78114042

## INTRODUCTION

A diagnosis of Type 1 diabetes (T1D) poses a significant economic burden on healthcare systems, due to the resources required for effective management, the associated complications, and its life-long course. As a result, it is estimated that the National Health Service (NHS) spends £1 billion a year on T1D; 11% of this expenditure is on inpatient care.[1] The cost of keeping someone in hospital is high and, as a result, there has been a growing emphasis on delivery of care within primary care and community settings.[2] Patients' attitudes are also shifting towards wanting to be more involved in their own care and wishing to be treated closer to home, as highlighted in the NHS England Five Year Forward Plan.[3] Evidence suggests that initial management of T1D can be successfully delivered at home rather than in hospital[4–6] although the cost-effectiveness of this approach is unknown in the UK.

T1D affects 25.1 per 100,000 children and young people in the United Kingdom (UK) and the incidence is rising.[7] It is a life-long condition which can lead to serious short (e.g. diabetic ketoacidosis (DKA)) and long-term (e.g. renal, vascular and retinal damage) complications.[8] The risk of complications is reduced if blood glucose is kept within healthy targets.[9] To achieve this, the National Institute for Health and Care Excellence (NICE) recommends offering children and their families intensive education on insulin management from diagnosis and a long-term package of care, delivered through a multidisciplinary team. The NICE guidelines state that the choice of where this initial care is delivered should be made based on clinical need, family circumstances and wishes.[10] Hospitalisation has been shown to be a substantially stressful event for both the child and their parents[11] and so should be avoided unless clinically necessary. Most children with T1D are not acutely unwell at diagnosis and therefore could be managed at home.[6,12]

However, there have been few, well-designed studies evaluating home versus hospital management. A Cochrane review in 2007 concluded that the results of prior studies were inconclusive but suggested that home management at diagnosis does not lead to any clinical, psychological or cost disadvantages.[5] Since this review, further randomised controlled trials (RCTs) have been conducted. One was carried out in Sweden, where home management was described as 'hospital-based-home-care' as it involved staying in a facility which was designed to replicate a home environment but was located in the hospital grounds.[13] There was no difference between 'hospital-based-home-care' and 'hospital care', in terms of glycated haemoglobin (HbA1c) (mean difference between groups 0.6 mmol/mol;  $p=0.777$ ) but a cost-effectiveness analysis reported significantly lower healthcare (direct) costs in the home managed group (- SEK 16,212 (-£1,318);  $p<0.05$ ).[13]

More recently, the Delivering Early Care In Diabetes Evaluation (DECIDE) RCT evaluated home versus hospital management at diagnosis in childhood diabetes.[14] It was conducted between 2008-2013 in eight paediatric diabetes centres in England, Wales and Northern Ireland. The primary outcome was HbA1c at 24 months post-diagnosis and secondary outcomes included coping, anxiety, quality of life (QoL) and use of NHS resources. The trial found no statistically significant difference in HbA1c between home and hospital management (1.01 mmol/mol, 95%

1  
2  
3 CI 0.93 to 1.09) and there were no differences in secondary outcomes at 24 months,  
4 other than a higher self-esteem in children who were managed at home.  
5

6 The aim of the present analysis was to estimate the cost effectiveness of home  
7 versus hospital management of children diagnosed with T1D from the perspective of  
8 the NHS in the UK.  
9

## 10 11 **METHODS**

12 The DECIDE trial protocol and results are described in detail elsewhere.[14,15]  
13 Briefly, DECIDE was a superiority RCT, designed to compare the clinical  
14 effectiveness of home care from diagnosis with hospital-based care in the  
15 management of T1D. The sample size needed to detect a difference in mean HbA1c  
16 of 5 mmol/mol (with an SD of 14 mmol/mol; equivalent to an effect size of 0.4) was  
17 200 participants (100 per group) at a 5% significance level and 80% power.  
18  
19

20 Following informed consent, 203 clinically well children aged less than 17 years old  
21 with newly diagnosed diabetes, from eight paediatric diabetes centres across the  
22 UK, were randomised to home or hospital management. Participants were eligible to  
23 take part if they or their carers were deemed able to complete the study  
24 requirements and gave informed assent or consent. Participants were excluded if  
25 they were not medically stable at diagnosis or required hospitalisation for other  
26 reasons. Full inclusion and exclusion criteria are described in the trial protocol.[15]  
27 The economic evaluation considered the intention to treat population.  
28  
29

### 30 31 **Ethics statement**

32 Multicentre approval was granted by Research Ethics Committee for Wales  
33 (07/MRE09/59). Site-specific approval was granted by participating Acute Trust  
34 Research and Development Departments. The trial sponsor was Cardiff University.  
35  
36

### 37 38 **Study perspective**

39 The base case analysis of this economic evaluation follows the cost perspective of  
40 the NHS[16]. Indirect costs (impact on productivity) and direct non-medical costs  
41 (incurred by the patient and his/her carer) were also evaluated through separate  
42 scenario analyses as T1D has been shown to have wider economic impacts.[17]  
43  
44

### 45 46 **Intervention and comparator**

47 The intervention involved management of the initiation period from diagnosis in the  
48 family's own home, for a minimum of 3 days, to include at least six supervised  
49 injections and delivery of pragmatic educational care. This meant that children were  
50 discharged on the day of diagnosis, with no overnight stays in hospital. All  
51 subsequent management, education (diabetes and dietetic) was provided by nursing  
52 staff and dietitians either in the child's home or as an outpatient. In comparison,  
53 participants in the hospital group were admitted to hospital on the day of diagnosis,  
54 for a minimum of three days and received education and support in line with local  
55 practice.  
56  
57

### 58 59 **Discount rate**

60 A discount rate of 3.5% per annum was applied to costs and consequences after 12  
months, as recommended by NICE.[16] We used this rate because all economic



1  
2  
3 evaluations require that future costs and effects are discounted to present value to  
4 account for time preference. In the UK, the discount rate is set at 3.5% per annum.  
5

### 6 **Estimating resources and costs**

7 Data on resource use were collected using case report forms (CRFs) at baseline,  
8 then at 3, 12 and 24 months which were summed to calculate total resource use  
9 over 24 months (Supplementary Materials Table 1). Baseline data comprised of data  
10 collected from the day of diagnosis until day 3 of either home or hospital  
11 management. Resource use prior to diagnosis was not included.  
12  
13

14 The base case analysis considered direct NHS resource use. This encompassed  
15 hospital stay, tests and investigations, insulin usage, nurse and dietician travel, and  
16 contacts with healthcare professionals.  
17

18 Contacts with healthcare professionals, along with distance travelled, was collected  
19 with each CRF. These were costed using the PSSRU 2019 compendium of NHS unit  
20 costs.[18]  
21

22 The unit costs of a paediatric overnight hospital stay were sourced from the NHS  
23 Reference Costs database 2019/20.[19]  
24

25 Tests and investigations were costed through contacting the Biochemistry and  
26 Immunology Department within the University Hospital of Wales, the main centre for  
27 the trial. Unit costs not provided were inflated from previously supplied figures from  
28 Cwm Taf Health Board to 2019/20 figures, using the CCEMG-EPPI-Centre Cost  
29 Converter.[20]  
30  
31

32 Insulin regimen data were collected at all time points. This included type of insulin,  
33 number of units prescribed throughout the day and related equipment usage (at  
34 follow-up only). Medical equipment included items such as testing strips, needles,  
35 and lancets. The British National Formulary for Children (BNFc) and the NHS  
36 Electronic Drug Tariff were used to reference insulin costs and equipment.[21,22]  
37  
38

39 Broader perspectives, considering non-healthcare resource use, were adopted in  
40 scenario analyses. These covered productivity losses incurred by the patient and  
41 their family (indirect costs), including days off school and work, as well as travel and  
42 out of pocket expenses (direct costs) related to managing T1D. Days taken off work  
43 were costed based on average salary earnings in the UK.[23] Time taken off school  
44 was costed based on calculating an average cost spent per pupil per day, based on  
45 the Annual Report on Education Spending in England.[24] Reported out of pocket  
46 expenses incurred by patients and their carers were inflated to 2019/20 costs using  
47 the UK Consumer Price Index.[25]  
48  
49

### 50 **Currency and cost year**

51 Costs were reported in British pounds sterling for 2019/20.  
52  
53

### 54 **Choice of model**

55 The results of the main DECIDE trial demonstrated no statistically significant clinical  
56 difference between home and hospital groups and therefore it was deemed that an  
57 evaluation of lifetime costs using an economic model was neither necessary nor  
58 informative.  
59  
60

## Assumptions

The CRFs did not collect data on length of consultations with healthcare professionals and so assumptions were made based on PSSRU data and through communication with healthcare professionals. Further assumptions relating to the calculation and estimation of costs are reported in Supplementary Materials Tables 2-7.

## Outcome measures and economic analysis

The primary measure of clinical effectiveness was HbA1c at 24 months. As alternative measures to enable the calculation of quality-adjusted life years (QALYs) were not used in DECIDE, HbA1c was used as the measure of effect for the cost-effectiveness analysis.

The mean total costs of each scenario were calculated for both the intervention and control groups over 24 months. This follow-up period was chosen as it was expected that most participants would have no significant endogenous insulin secretion by this time point. Costs are also reported for the initiation period (0-3 days).

Cost-effectiveness was assessed through estimation of the incremental cost per unit change in HbA1c (mmol/mol). This is based on the difference in mean total cost per patient between the intervention and control group (home and hospital management), divided by the difference in mean HbA1c. The resulting incremental cost-effectiveness ratio (ICER) was compared with reference to what the NHS is willing to pay (WTP) for an additional unit change in HbA1c; this being inferred from existing interventions in diabetes.

A cost consequences analysis (CCA) was conducted, in which the costs and outcomes are presented in a tabular format to support decision makers and allow them to attach their own weighting to each result. These outcomes include measures of physical, psychological and social consequences based on parent answers about their child.

## Analytical methods

Data collected were inputted into IBM SPSS Version 25 for analysis.[26] The data were assessed for accuracy and missing data. Any outliers identified were checked against the original CRF and then investigated through a sensitivity analysis. An analysis of randomness was carried out on missing data to compare against patients' socio-demographic data.[27] If participants left a blank response, we assumed that zero items of resources were used.

Uncertainty in the cost-effectiveness ratio was considered by use of non-parametric bootstrapping using Stata.[28] This involved sampling (with replacement) pairs of mean cost and HbA1c 10,000 times as a means of estimating the sampling distribution.[29] Separate regression analyses were conducted to adjust total costs (by arm and centre) and 24 month HbA1c (on arm, centre and baseline HbA1c). This produced 95% confidence intervals for each cost variable and the differences in both costs and effect for calculating the ICER. This was done for direct healthcare costs with and without patient or carer borne costs. Microsoft Excel was then used to bootstrap HbA1c and total direct healthcare costs at 24 months (1000 replications) and results are displayed on a cost-effectiveness plane. The cost-effectiveness plane is used to visually represent the differences in costs and health outcomes between

1  
2  
3 arms in two dimensions. A cost-effectiveness acceptability curve (CEAC) was drawn  
4 to represent the probability of cost-effectiveness for different values of WTP.[30] This  
5 was repeated for the wider perspective, encompassing direct non-healthcare costs  
6 and indirect productivity losses. The CEAC is used to summarise the impact of  
7 uncertainty on the result of an economic evaluation. It represents the probability of an  
8 intervention being cost-effective for any given value of the cost-effectiveness  
9 threshold.  
10

11 A univariate sensitivity analysis was also conducted, adjusting the cost of an  
12 overnight stay in hospital for an alternative value, to assess the impact on the ICER.  
13  
14

### 15 **Reporting**

16 The economic analysis of DECIDE is reported in accordance with the Consolidated  
17 Health Economic Evaluation Reporting Standards (CHEERS).[31]  
18  
19

### 20 **Patient and Public Involvement**

21 There was no direct involvement of patients or the public in this health economics  
22 study. However, two parents of children diagnosed with T1D were involved in the  
23 initial design of the DECIDE trial. One of these parents was a co-applicant on the  
24 funding application and was instrumental in ensuring that the trial was informed by  
25 the families' experience. She also attended the ethics committee meeting to provide  
26 a service user perspective of the value of the trial to inform the committee's decision.  
27 She and another parent were part of the Trial Management Group which met  
28 monthly and provided input on the conduct of the trial throughout.  
29  
30  
31  
32  
33  
34  
35  
36  
37  
38  
39  
40  
41  
42  
43  
44  
45  
46  
47  
48  
49  
50  
51  
52  
53  
54  
55  
56  
57  
58  
59  
60

## RESULTS

### Sample

Of the 203 children involved in the trial, one participant dropped out within the first few days, eight were missing a 24-month HbA1c measurement and one patient did not have a baseline HbA1c. Therefore, the primary analysis of the clinical data reported results on the remaining 193 participants. To ensure consistency and allow for calculation of the ICER, the same participants were included in the economic analysis.

### Healthcare outcomes

The DECIDE trial found no significant difference in HbA1c at 24 months between home and hospital management (72.1mmol/mol and 72.6mmol/mol;  $p=0.863$ , respectively). This was not affected by repeated measures or sensitivity analyses. Baseline characteristics were explored and both groups were considered to have reasonable similarities.[14]

### Direct healthcare resource use and costs

Over 24 months, home management was less costly than hospital management (-£2,217; 95% CI -£2,825 to -£1,609;  $p<0.001$ ) (Table 1). The greatest difference in direct NHS costs, in favour of home management, was seen during days 0-3 (-£2,223; 95% CI -£2,373 to -£2,072;  $p<0.001$ ). During this time, participants in the home management group had fewer contacts with consultants and junior doctors but more non face-to-face interactions with nurses (i.e. telephone calls and email correspondence) (Table 2). Overall, this led to costs during days 0-3 of £974 per child for home management and £720 for hospital management, in terms of contacts with the Diabetes Team (mean difference in cost of £254; 95% CI £147 to £361;  $p<0.001$ ). The cost of nurse travel was also significantly higher for home management (mean difference £115; 95% CI £86 to £143;  $p<0.001$ ). However, this increased expense was outweighed by the cost of the hospital stay in the first three days for those in the hospital group (£2,583; 95% CI £2,464 to £2,702 per child). This had the greatest contribution to the total direct healthcare costs.

### Non-healthcare resource use and costs

There were no significant differences between home or hospital in either the number of days off school or work during the initiation period (0-3 days) (Table 2); and this remained similar between groups over the 24-month follow-up period. Home management was not found to be significantly less costly than hospital management for patients and their carers at 0-3 days (-£21; 95% CI -£101 to £59;  $p=0.607$ ) or 24 months (£338; 95% CI -£963 to £286;  $p=0.288$ ) (Table 1).

### Healthcare and non-healthcare costs

Overall, home management was significantly less costly than hospital management for the base case analysis (-£2217; 95% CI -£2,825 to -£1,609,  $p<0.001$ ). The difference in costs to the patient and their carers between home and hospital management was not statistically significant. However, adopting a wider perspective which encompasses direct NHS costs and patient/carer borne costs, led to home management being significantly less costly (-£2,556; 95% CI -£3,494 to -£1,618;

1  
2  
3 p<0.001) (Table 3). Full costs, confidence intervals and significance levels for all  
4 resource use data collected are presented in Supplementary Materials Table 8-13.  
5  
6  
7  
8  
9  
10  
11  
12  
13  
14  
15  
16  
17  
18  
19  
20  
21  
22  
23  
24  
25  
26  
27  
28  
29  
30  
31  
32  
33  
34  
35  
36  
37  
38  
39  
40  
41  
42  
43  
44  
45  
46  
47  
48  
49  
50  
51  
52  
53  
54  
55  
56  
57  
58  
59  
60

For peer review only

Table 1 Costs relating to resource use

|                                 |                                                | Home management (n=98),<br>mean (95% CI) (£) | Hospital management<br>(n=95), mean (95% CI) (£) | Difference between Home<br>and Hospital, mean (95%<br>CI) (£) | p-value for<br>Difference between<br>Home and Hospital |
|---------------------------------|------------------------------------------------|----------------------------------------------|--------------------------------------------------|---------------------------------------------------------------|--------------------------------------------------------|
| <b>DIRECT HEALTHCARE COSTS</b>  |                                                |                                              |                                                  |                                                               |                                                        |
| <b>Days 0-3</b>                 | Contact with diabetes team                     | 974 (889 to 1059)                            | 720 (658 to 782)                                 | 254 (147 to 361)                                              | <0.001                                                 |
|                                 | Other Health Professionals                     | 0 (-0. to 0)                                 | 1 (-1 to 4)                                      | -1 (-4 to 1)                                                  | 0.223                                                  |
|                                 | Tests and Investigations                       | 55 (49 to 61)                                | 62 (56 to 67)                                    | -7 (-15 to 1)                                                 | 0.100                                                  |
|                                 | Hospital stay                                  | 0                                            | 2583 (2464 to 2702)                              | -2583 (-2702 to -2463)                                        | <0.001                                                 |
|                                 | Nurse travel                                   | 133 (107 to 159)                             | 18 (8 to 28)                                     | 115 (86 to 143)                                               | <0.001                                                 |
|                                 | Dietician travel                               | 3 (1 to 5)                                   | 1 (-1 to 2)                                      | 2 (0 to 5)                                                    | 0.039                                                  |
|                                 | Total cost days 0-3                            | 1163 (1079 to 1248)                          | 3386 (3261 to 3511)                              | -2223 (-2373 to -2072)                                        | <0.001                                                 |
| <b>Follow-up<br/>(24months)</b> | Contact with the diabetes<br>team              | 1984 (1876 to 2092)                          | 2017 (1915 to 2119)                              | -33 (-182 to 116)                                             | 0.664                                                  |
|                                 | - Outpatient Visits                            | 1400 (1344 to 1455)                          | 1392 (1341 to 1443)                              | 8 (-67 to 83)                                                 | 0.837                                                  |
|                                 | - Contact with the<br>diabetes team<br>(other) | 584 (502 to 667)                             | 625 (541 to 709)                                 | -41 (-160 to 79)                                              | 0.502                                                  |
|                                 | Hospital contacts                              | 897 (569 to 1225)                            | 860 (553 to 1167)                                | 37 (-413 to 487)                                              | 0.874                                                  |
|                                 | Tests and Investigations                       | 8 (5 to 11)                                  | 8 (6 to 11)                                      | -1 (-4 to 4)                                                  | 0.968                                                  |
|                                 | Total Insulin                                  | 457 (402 to 512)                             | 446 (397 to 495)                                 | 11 (-63 to 85)                                                | 0.773                                                  |
|                                 | Equipment                                      | 1745 (1567 to 1924)                          | 1714 (1544 to 1883)                              | 31 (-218 to 281)                                              | 0.803                                                  |
|                                 | Other Health Professional<br>Visits            | 195 (149 to 240)                             | 236 (177 to 295)                                 | -41 (-115 to 33)                                              | 0.278                                                  |
|                                 | Total follow-up cost                           | 5287 (4864 to 5709)                          | 5282 (4883 to 5680)                              | 5 (-584 to 594)                                               | 0.986                                                  |
| <b>Total cost at 24months</b>   |                                                | 6450 (6004 to 6897)                          | 8668 (8255 to 9080)                              | -2217 (-2825 to -1609)                                        | <0.001                                                 |
| <b>PATIENT/CARER COSTS</b>      |                                                |                                              |                                                  |                                                               |                                                        |
| <b>Days 0-3</b>                 | Days off school                                | 66 (56 to 75)                                | 57 (47 to 67)                                    | 8 (-5 to 22)                                                  | 0.235                                                  |
|                                 | Days off work                                  | 250 (203 to 297)                             | 256 (201 to 310)                                 | -5 (-77 to 66)                                                | 0.886                                                  |
|                                 | Travel                                         | 11 (9 to 12)                                 | 18 (15 to 21)                                    | -8 (-11 to -4)                                                | <0.001                                                 |
|                                 | Out of pocket expenses                         | 8 (7 to 10)                                  | 22 (17 to 27)                                    | -14 (-19 to -8)                                               | <0.001                                                 |

|                               |                        |                     |                        |                        |        |
|-------------------------------|------------------------|---------------------|------------------------|------------------------|--------|
|                               | Total cost days 0-3    | 331 (280 to 383)    | 352 (292 to 412)       | -21 (-101 to 59)       | 0.601  |
| <b>Follow-up (24months)</b>   | Days off school        | 443 (363 to 523)    | 454 (349 to 559)       | -11 (-143 to 122)      | 0.871  |
|                               | Days off work          | 869 (609 to 1128)   | 1180 (679 to 1681)     | -312 (-871 to 247)     | 0.275  |
|                               | Travel                 | 63 (56 to 71)       | 61 (49 to 72)          | 3 (-11 to 17)          | 0.687  |
|                               | Out of pocket expenses | 44 (32 to 56)       | 42 (30 to 54)          | 2 (-15 to 20)          | 0.779  |
|                               | Total follow-up cost   | 1420 (1134 to 1705) | 1737 (1207 to 2267)    | -317 (-916 to 281)     | 0.297  |
| <b>Total cost at 24months</b> |                        | 1751 (1448 to 2054) | 2089 (1547 to 2631)    | -338 (-963 to 286)     | 0.290  |
| <b>TOTAL COST</b>             |                        | 8201 (7585 to 8817) | 10757 (10050 to 11463) | -2556 (-3494 to -1618) | <0.001 |

Table 2 Units of resource use

|                                       |                                 | Home Management (n = 98) |         |         | Hospital Management (n = 95) |         |         |
|---------------------------------------|---------------------------------|--------------------------|---------|---------|------------------------------|---------|---------|
|                                       |                                 | Median                   | Range   |         | Median                       | Range   |         |
|                                       |                                 |                          | Minimum | Maximum |                              | Minimum | Maximum |
| <b>DIRECT HEALTHCARE RESOURCE USE</b> |                                 |                          |         |         |                              |         |         |
| <b>Days 0-3</b>                       | Contacts with the diabetes team |                          |         |         |                              |         |         |
|                                       | - Consultant                    | 1.0                      | 0.0     | 9.0     | 2.0                          | 0.0     | 5.0     |
|                                       | - Junior doctor                 | 1.0                      | 0.0     | 5.0     | 3.0                          | 0.0     | 10.0    |
|                                       | - Nurse                         |                          |         |         |                              |         |         |
|                                       | • Face to face                  | 6.0                      | 0.0     | 13.0    | 6.0                          | 0.0     | 32.0    |
|                                       | • Telephone calls/emails        | 2.0                      | 0.0     | 28.0    | 0.0                          | 0.0     | 3.0     |
|                                       | - Dietitian                     | 1.0                      | 0.0     | 3.0     | 1.0                          | 0.0     | 3.0     |
|                                       | Other health care professionals | 0.0                      | 0.0     | 1.0     | 0.0                          | 0.0     | 2.0     |
|                                       | Test and investigations         |                          |         |         |                              |         |         |
|                                       | - Diagnosis related             | 4.0                      | 0.0     | 8.0     | 5.0                          | 1.0     | 12.0    |
|                                       | - Other                         | 2.0                      | 0.0     | 4.0     | 3.0                          | 0.0     | 6.0     |
|                                       | Hospital stay (days)            | 0.0                      | 0.0     | 0.0     | 3.0                          | 0.0     | 6.0     |
|                                       | Travel                          |                          |         |         |                              |         |         |
| - Nurse travel distance (miles)       | 40.0                            | 0.0                      | 214.0   | 0.0     | 0.0                          | 192.0   |         |
| - Dietician travel distance (miles)   | 0.0                             | 0.0                      | 24.0    | 0.0     | 0.0                          | 32.0    |         |
| <b>Follow-up</b>                      | Contacts with the diabetes team |                          |         |         |                              |         |         |

|                                         |                             |         |        |         |         |        |         |
|-----------------------------------------|-----------------------------|---------|--------|---------|---------|--------|---------|
| <b>(24months)</b>                       | - Outpatient*               | 9.0     | 6.0    | 18.0    | 9.0     | 6.0    | 16.0    |
|                                         | - Other**                   | 28.5    | 2.0    | 128.0   | 31.0    | 2.0    | 158.0   |
|                                         | Hospital contacts           |         |        |         |         |        |         |
|                                         | - A&E                       | 0.0     | 0.0    | 8.0     | 0.0     | 0.0    | 6.0     |
|                                         | - Ward                      | 0.0     | 0.0    | 16.0    | 0.0     | 0.0    | 8.0     |
|                                         | Tests and investigations*** |         |        |         |         |        |         |
|                                         | Insulin                     | 18889.5 | 2138.0 | 64354.0 | 19669.0 | 2351.5 | 48858.0 |
|                                         | Other health professionals  |         |        |         |         |        |         |
|                                         | - GP                        | 2.0     | 0.0    | 14.0    | 2.0     | 0.0    | 19.0    |
|                                         | - Nurse                     | 1.0     | 0.0    | 8.0     | 0.0     | 0.0    | 31.0    |
| - Other                                 | 0.0                         | 0.0     | 11.0   | 0.0     | 0.0     | 22.0   |         |
| <b>PATIENT/CARER RESOURCE USE</b>       |                             |         |        |         |         |        |         |
| <b>Days 0-3</b>                         | Days off school             | 2.0     | 0.0    | 5.0     | 2.0     | 0.0    | 5.0     |
|                                         | Days off work               | 2.0     | 0.0    | 9.0     | 2.0     | 0.0    | 14.0    |
|                                         | Travel (hours)              | 2.0     | 0.0    | 7.0     | 3.0     | 0.0    | 16.0    |
|                                         | Out of pocket expenses (£)  | 11      | 0      | 38      | 16      | 0      | 87      |
| <b>Follow-up (24months)</b>             | Days off school             | 11.0    | 0.0    | 64.0    | 11.0    | 0.0    | 129.0   |
|                                         | Days off work               | 3.3     | 0.0    | 70.0    | 4.0     | 0.0    | 164.0   |
|                                         | Travel (hours)              | 10.0    | 0.0    | 96.0    | 9.0     | 0.0    | 92.0    |
|                                         | Out of pocket expenses (£)  | 33      | 0      | 546     | 27      | 0.0    | 468     |
| <b>Total Patient/carer resource use</b> | Days off school             | 13.0    | 0.0    | 66.0    | 13.5    | 0.0    | 132.0   |
|                                         | Days off work               | 5.0     | 0.0    | 78.0    | 6.5     | 0.0    | 167.5   |
|                                         | Travel (hours)              | 12.0    | 3.0    | 99.0    | 13.0    | 0.0    | 94.0    |
|                                         | Out of pocket expenses (£)  | 43      | 0      | 546     | 48      | 0      | 555     |

\*Two patients had visits with the nurse outside of the patient setting. \*\*Home visits, telephone calls and emails. \*\*\*From CRF 7 only.



### Cost effectiveness

Home management dominated hospital management. In the base case analysis, the ICER was £7,434 saved per additional mmol/mol reduction of HbA1c (Table 3). Based on the bootstrapped analysis for consideration of the joint uncertainty in costs and effects, the cost-effectiveness plane shows that home management has the potential to be cost saving for the NHS without changing clinical effectiveness (Figure 1). The cost-effectiveness acceptability curve (CEAC) is somewhat counterintuitive for cost-saving interventions, in that the probability of home management being cost-effective reduces to 50% when the willingness to pay increases to £7,770 per unit reduction of HbA1c (mmol/mol) (Figure 2).

An alternative unit cost for an overnight paediatric stay in hospital was explored through a univariate sensitivity analysis. This figure was based on a previous study,[32] inflated to the current year, to give a value of £692. This had no significant impact on the ICER (£5,451 saving per additional unit reduction in HbA1c (mmol/mol)) and the difference in direct healthcare costs between home and hospital at 24 months remained statistically significant (Table 3 and Supplementary Materials Figure 1 and 2).

Adopting a broader cost perspective by incorporating both direct healthcare and non-healthcare costs, the ICER increased to £8,585 saving per additional mmol/mol reduction of HbA1c (Table 3). This does not have a significant effect on the distribution on the cost-effectiveness plane or on the probability of home management being cost-effective (Supplementary Materials Figure 3 and 4). Home management remained the dominant strategy.

### Cost Consequences Analysis

A table presenting costs alongside psychological, physical and social consequences reported in the main trial is displayed in Supplementary Materials Table 14. Outcomes are taken from the child questionnaires.

Table 3 Cost-effectiveness results for each analysis scenario

| Analysis Scenario                             | Incremental cost (£)*, 95% CI, p-value | Incremental effect (HbA1c in mmol/mol), 95% CI, p-value | ICER**, 95% CI, p-value, Quadrant         | Cost-effectiveness probability for given WTP (%) |         |         |
|-----------------------------------------------|----------------------------------------|---------------------------------------------------------|-------------------------------------------|--------------------------------------------------|---------|---------|
|                                               |                                        |                                                         |                                           | £5,000                                           | £10,000 | £15,000 |
| Direct Healthcare perspective                 | -2182, -2783 to -1581, <0.001          | -0, -6 to 6, 0.923                                      | 7434, -73369 to 88237, 0.857<br>Dominant  | 51.2                                             | 48.8    | 48.1    |
| Direct Healthcare + Patient/carer perspective | -2520, -3465 to -1576, <0.001          | -0, -6 to 6, 0.923                                      | 8585, -91610 to 108781, 0.867<br>Dominant | 51.9                                             | 49.6    | 48.3    |
| Sensitivity analysis                          | -1600, -2198 to -1002, <0.001          | -0, -6 to 6, 0.923                                      | 5451, -57926 to 68828, 0.866,<br>Dominant | 50.3                                             | 48.4    | 47.6    |

1  
2  
3 \* difference in cost between home and hospital management. \*\* (£ saved per additional unit change in HbA1c  
4 (mmol/mol))  
5  
6  
7  
8  
9

## 10 Discussion

11 This economic evaluation was designed to assess whether delivering management  
12 at home for children with T1D who are clinically well at diagnosis would represent a  
13 cost-effective strategy for the NHS. The results indicate that the difference between  
14 home and hospital management in terms of direct NHS costs over 24 months, of  
15 £2,182 per patient, favours home management. Uncertainty analysis indicated that  
16 the probability of home management being cost saving was 1.0. The greatest driver  
17 of differences in healthcare costs was the cost of hospitalisation during the initiation  
18 period. The ICER for the base-case analysis indicated that home management was  
19 dominant, with £7,434 saved per additional unit reduction in mmol/mol of HbA1c.  
20 Sensitivity analysis indicated that the cost-effectiveness was stable to the choice of  
21 which costs were included. However, there is considerable uncertainty around the  
22 difference in effect (HbA1c), reflected in the probability of the cost-effectiveness on  
23 the CEAC being ~0.5 even at high thresholds of willingness to pay.  
24  
25  
26  
27

### 28 Strengths and weaknesses

29 The major strength of this evaluation is that it is based on an RCT, which reduces  
30 the risk for potential bias and uses patient-level data. The analysis was conducted in  
31 line with the main trial to ensure consistency and methods followed the NICE  
32 reference case.  
33

34 A limitation of this study is that QALYs were not used as the measure of health  
35 outcome. The main trial did not collect data on health-utility in order to estimate  
36 QALYs due to the lack of a validated paediatric utility measure at the time of study  
37 commencement, especially in younger children.[33] Therefore, we are unable to  
38 determine whether the ICER would be acceptable, given the NICE threshold of  
39 £20,000-30,000 per QALY. However, HbA1c is known to be a useful surrogate  
40 outcome measure in assessing the effectiveness of interventions for T1D as it is  
41 positively associated with an increased risk of long-term complications.[34,35] The  
42 ADaPT study of a diabetes-specific psychological intervention administered by  
43 diabetes nurses is an example of a trial which reports costs alongside HbA1c  
44 improvement, in addition to QALYs. The authors state that basing cost-effectiveness  
45 on HbA1c outcomes rather than QALYs can lead to higher probabilities of cost-  
46 effectiveness and this is an important point to be aware of when interpreting our  
47 results.[36] However, their ICER of £457 per 1mmol/mol decrease in HbA1c is based  
48 on spending more for decreases in HbA1c, not saving costs as in our ICER, and  
49 therefore is not comparable for interpreting WTP.  
50  
51  
52  
53

54 This leads to a second limitation in that we chose not to perform long-term  
55 extrapolation to assess the cost-effectiveness over a patient's lifetime. Life-time  
56 extrapolation relies on economic models which use QALYs as the measure of effect.  
57 However, despite many models existing for use in T1D, a lack of validation in the  
58 paediatric setting undermines their application in the context of the DECIDE trial.[37]  
59  
60

1  
2  
3 Moreover, as there was no statistically significant difference in clinical effectiveness,  
4 this would also require assumptions on long-term benefits which could introduce  
5 bias.  
6

7 The accuracy of the final unit costings may have been impacted by varying  
8 interpretation of case report forms and ability to recall, as parents were asked to  
9 recall answers by nurses who then completed the forms. However, questions about  
10 resource use were limited to a 3-month recall period, which is the general recall  
11 period for trial-based economic evaluations.[38] Completion rates of forms were also  
12 high, with a small proportion of missing data. In addition, there are a number of  
13 methodological challenges in assigning costs to days of missed schooling, with no  
14 clear consensus on the most appropriate approach.[39] We costed the time taken off  
15 school based on calculating an average cost spent per pupil per day, based on the  
16 Annual Report on Education Spending in England.[24] This may underestimate the  
17 economic consequences of forgone leisure time and educational achievement.  
18  
19

20  
21 A final limitation is that there have been changes in practice and consequently  
22 resource use and costs since the trial commenced. For example, test and  
23 investigation use was costed from one site only and this figure is likely to differ  
24 across centres. However, all costs were updated to, or based on, most recent figures  
25 to ensure relevance to the current NHS costs and any differences between sites to  
26 the overall outcomes was considered likely to be small and therefore unlikely to  
27 effect the overall findings. It should also be noted that at the time this study was  
28 conducted, few patients were using continuous glucose monitoring to allow us to  
29 collect data on 'time in range'.  
30  
31  
32

### 33 **Context in the current literature**

34 This is the first cost-effectiveness evaluation to compare home versus hospital  
35 management of T1D at diagnosis in children and young people in a UK setting.  
36 Costs were based on the UK healthcare system (NHS) and taken from national UK  
37 databases. The trial was conducted over eight different centres throughout the UK  
38 and hospital management was pragmatic, following local standard practice, which  
39 increases our confidence in the generalisability of the results to other areas of the  
40 UK.  
41  
42

43 The findings of this evaluation are comparable to other studies.[5, 13] However,  
44 interpretation of previous studies is limited by the use of small sample sizes, non-UK  
45 settings and all of them involved 'hybrid' models of care; meaning 'home  
46 management' involved care within the hospital and home/outpatient setting.  
47 Therefore, previous studies have not evaluated home care exclusively from the day  
48 of diagnosis and their reproducibility within the UK healthcare setting may be limited.  
49  
50

### 51 **Implications for practice and research**

52 Home management led to significant cost reductions for the NHS at both three days  
53 and 24 months. This economic evaluation, alongside the main trial provides  
54 evidence for home care being the first line approach for management of T1D at  
55 diagnosis in children who are clinically well. However, since the start of this trial,  
56 education has become more intensive and insulin delivery and blood glucose  
57 monitoring more complex. As a result, many centres choose to admit all patients by  
58 default, despite NICE guidance supporting home management.[10] The identified  
59  
60

1  
2  
3 cost-saving of around £2,000 per patient (over 2 years) could be invested in  
4 community services to manage this increased demand on healthcare professionals,  
5 increasing the feasibility of delivering a package of care which would normally be  
6 delivered in hospital.  
7

8  
9 It is envisaged that the results of this analysis will contribute to the evidence  
10 supporting future updates of NICE Guidelines on management of T1D in children  
11 and adolescents at diagnosis. Further research could involve testing a hybrid model  
12 of care within the UK-setting, incorporating updates in the management approach,  
13 and measuring costs and utility.  
14

## 15 **Conclusion**

16 Home management from diagnosis of T1D for children who are medically stable  
17 represents a saving of £2,182 per patient with no significant impact on clinical  
18 effectiveness. These findings add to the main DECIDE trial which demonstrated that  
19 home management at the onset of T1D did not lead to any significant differences in  
20 glycaemic control. With incidence of T1D increasing and the demand for hospital  
21 beds rising, implementation of this approach as standard practice could prove to be  
22 a cost-saving step in the patient pathway.  
23  
24  
25  
26  
27

## 28 **Funding statement**

29 This work was supported by Diabetes UK grant number RD06/0003353

## 30 **Role of the funding source**

31 The funders of the study had no role in study design, data collection, data analysis, data interpretation,  
32 or writing of the report.  
33

## 34 **Competing interests statement**

35 All authors have completed the ICMJE uniform disclosure form at [www.icmje.org/coi\\_disclosure.pdf](http://www.icmje.org/coi_disclosure.pdf)  
36 and declare: no support from any organisation for the submitted work; no financial relationships with  
37 any organisations that might have an interest in the submitted work in the previous three years; no  
38 other relationships or activities that could appear to have influenced the submitted work.  
39

## 40 **Author contributions**

41 ZMcC had full access to all the data in the study, conducted the analyses and drafted the manuscript.  
42 JT, JWG, TP and DH supervised ZMcC and take responsibility of the study in its entirety and for the  
43 decision to submit for publication.

44 JWG, RP and MR were responsible for developing the initial DECIDE research question and trial  
45 design, and implementation of the trial protocol. DH, TP and RP were responsible for all statistical  
46 considerations and analysis. DH was responsible for designing the health economics study. All those  
47 listed as authors contributed to the trial delivery and health economics study and were responsible for  
48 reading, commenting upon, and approving the final manuscript. The manuscript's guarantors  
49 (JT, JWG and DH) affirm that the manuscript is an honest, accurate, and transparent account of the  
50 study being reported; that no important aspects of the study have been omitted; and that any  
51 discrepancies from the study as planned (and, if relevant, registered) have been explained.  
52

## 53 **Acknowledgements**

54 The authors acknowledge with thanks the trial funders Diabetes UK and all the patients and carers  
55 participating in the trial. The Centre for Trials Research receives funding by the Welsh Government  
56 through Health and Care Research Wales and the authors gratefully acknowledge the Centre's  
57 contribution to trial implementation. The authors acknowledge the contribution of Prof Kerry Hood who  
58 contributed to the initial trial design and conduct throughout; Mirella Longo and Prof David Cohen who  
59 contributed to the design of the health economic methodology, prior to, and during data collection. Trial  
60 Steering Committee (Adele McEvilly, Chris Patterson and Michael Bowdery), chaired by Dr Peter Swift;  
the trial administrator, Jackie Swain; the clinical teams at each of the 8 trial sites, the DECIDE project

1  
2  
3 nurses and research nurses from NISCHR who provided support to the trial; the participating NHS  
4 Trusts and local Principal Investigators were The Royal Hospitals Belfast Health and Social Care Trust  
5 (Dr Dennis Carson), Cambridge (Dr Carlo Acerini), Cardiff and Vale NHS Trust (Prof JW Gregory and  
6 Dr JT Warner), Hull and East Yorkshire Hospitals NHS Trust (Dr Verghese Mathew), Alder Hey  
7 Children's NHS Foundation Trust, Liverpool (Dr Princy Paul), Newcastle upon Tyne Hospitals  
8 Foundation NHS Trust (Dr Tim Cheetham), Nottingham University Hospitals NHS Trust (Dr Tabitha  
9 Randell), University Hospital, Southampton NHS Trust (Dr Nicola Trevelyan and Dr Justin Davies); the  
10 stakeholders and others who have contributed.

### 11 **Data sharing**

12 De-identified participant data will be made available to the scientific community with as few  
13 restrictions as feasible, whilst retaining exclusive use until the publication of major outputs. Data will  
14 be available via the corresponding author.  
15  
16  
17  
18  
19  
20  
21  
22  
23  
24  
25  
26  
27  
28  
29  
30  
31  
32  
33  
34  
35  
36  
37  
38  
39  
40  
41  
42  
43  
44  
45  
46  
47  
48  
49  
50  
51  
52  
53  
54  
55  
56  
57  
58  
59  
60

For peer review only

## REFERENCES

- 1 Diabetes UK. The Cost of Diabetes report. <https://www.diabetes.org.uk/> (accessed 17 Mar 2021).
- 2 NHS Long Term Plan. 2019. <https://www.longtermplan.nhs.uk/>
- 3 NHS England. NHS Five Year Forward View. 2014. <https://www.england.nhs.uk/five-year-forward-view/>. (accessed 17 Mar 2021).
- 4 Swift PG, Hearnshaw JR, Botha JL, *et al*. A decade of diabetes: keeping children out of hospital. *BMJ Br Med J* 1993;**307**:96–8. <http://www.ncbi.nlm.nih.gov/pmc/articles/PMC1697706/>
- 5 Clar C, Waugh N, Thomas S. Routine hospital admission versus out-patient or home care in children at diagnosis of type 1 diabetes mellitus. *Cochrane Database Syst Rev* 2007;:N.PAG-N.PAG 1p. doi:10.1002/14651858.CD004099.pub2
- 6 Lowes L, Lyne P, Gregory JW. Childhood diabetes: parents' experience of home management and the first year following diagnosis. *Diabet Med* 2004;**21**. doi:10.1111/j.1464-5491.2004.01193.x
- 7 Royal College of Paediatrics and Child Health. National Paediatric Diabetes Audit 2017 - 2018 (Version 2). 2019. <https://www.rcpch.ac.uk/resources/npda-annual-reports>
- 8 Diabetes UK. Type 1 Diabetes. <https://www.diabetes.org.uk/type-1-diabetes> (accessed 17 Mar 2021).
- 9 Gubitosi-Klug RA. The Diabetes Control and Complications Trial/Epidemiology of Diabetes Interventions and Complications Study at 30 Years: Summary and Future Directions. *Diabetes Care* 2014;**37**:44 LP – 49. doi:10.2337/dc13-2148
- 10 Diabetes (type 1 and type 2) in children and young people: diagnosis and management | Key-priorities-for-implementation | Guidance and guidelines | NICE. Published Online First: 2015. <https://www.nice.org.uk/guidance/ng18/chapter/key-priorities-for-implementation#.V3uVbDnLU8.mendeley> (accessed 17 Mar 2021).
- 11 Commodari E. Children staying in hospital: a research on psychological stress of caregivers. *Ital J Pediatr* 2010;**36**:40. doi:10.1186/1824-7288-36-40
- 12 Dougherty G, Schiffrin A, White D, *et al*. Home-based Management Can Achieve Intensification Cost-effectively in Type I Diabetes. *Pediatrics* 1999;**103**:122 LP – 128. <http://pediatrics.aappublications.org/content/103/1/122.abstract>
- 13 Tiberg I, Lindgren B, Carlsson A, *et al*. Cost-effectiveness and cost-utility analyses of hospital-based home care compared to hospital-based care for children diagnosed with type 1 diabetes; a randomised controlled trial; results after two years' follow-up. *BMC Pediatr* 2016;**16**:1–12. doi:10.1186/s12887-016-0632-8
- 14 Gregory JW, Townson J, Channon S, *et al*. Effectiveness of home or hospital initiation of treatment at diagnosis for children with type 1 diabetes (DECIDE trial): a multicentre individually randomised controlled trial. *BMJ Open* 2019;**9**:e032317. doi:10.1136/bmjopen-2019-032317
- 15 Townson JK, Gregory JW, Cohen D, *et al*. Delivering early care in diabetes evaluation (DECIDE): A protocol for a randomised controlled trial to assess hospital versus home management at diagnosis in childhood diabetes. *BMC Pediatr* 2011;**11**. doi:10.1186/1471-2431-11-7

- 1  
2  
3 16 National Institute for Health and Care Excellence. Guide to the Methods of Technology  
4 Appraisal: NICE Process and Methods Guides No. 9. London: 2013.  
5 <https://pubmed.ncbi.nlm.nih.gov/27905712/>  
6
- 7 17 López-Bastida J, López-Siguero JP, Oliva-Moreno J, *et al.* Social economic costs of type 1  
8 diabetes mellitus in pediatric patients in Spain: CRYSTAL observational study. *Diabetes Res*  
9 *Clin Pract* 2017;**127**:59–69. doi:<https://doi.org/10.1016/j.diabres.2017.02.033>  
10
- 11 18 Curtis, L, and Burns A. Unit Costs of Health and Social Care 2019. Canterbury: 2019.  
12 doi:10.22024/UniKent/01.02.79286  
13
- 14 19 NHS Improvement and NHS England. Annex A: The national tariff workbook. 2020.  
15 <https://improvement.nhs.uk/resources/national-tariff/>  
16
- 17 20 CCEMG-EPPI. CCEMG - EPPI-Centre Cost Converter v.1.4.  
18 2019.<https://epi.ioe.ac.uk/costconversion/> (accessed 17 Mar 2021).  
19
- 20 21 National Institute for Health and Clinical Excellence. BNF for Children: British National  
21 Formulary. 2020.<https://bnfc.nice.org.uk/> (accessed 17 Mar 2021).  
22
- 23 22 NHS Business Services Authority. NHS Electronic Drug Tariff.  
24 2020.<http://www.drugtariff.nhsbsa.nhs.uk/>. (accessed 17 Mar 2021).  
25
- 26 23 Office for National Statistics. Employee earnings in the UK: Office for National Statistics 2019.  
27 2020.[https://www.ons.gov.uk/employmentandlabourmarket/peopleinwork/earningsandwork](https://www.ons.gov.uk/employmentandlabourmarket/peopleinwork/earningsandworkhours/bulletins/annualsurveyofhoursandearnings/2020)  
28 [kinghours/bulletins/annualsurveyofhoursandearnings/2020](https://www.ons.gov.uk/employmentandlabourmarket/peopleinwork/earningsandworkhours/bulletins/annualsurveyofhoursandearnings/2020) (accessed 17 Mar 2021).  
29
- 30 24 Belfield, C, Farquharson, C, Sibieta, L. Annual Report on Education Spending in England.  
31 London: 2018. [www.ifs.org.uk](http://www.ifs.org.uk)  
32
- 33 25 Office for National Statistics. Consumer price inflation, UK.  
34 2020.[https://www.ons.gov.uk/economy/inflationandpriceindices/bulletins/consumerpriceinfl](https://www.ons.gov.uk/economy/inflationandpriceindices/bulletins/consumerpriceinflation/previousReleases)  
35 [ation/previousReleases](https://www.ons.gov.uk/economy/inflationandpriceindices/bulletins/consumerpriceinflation/previousReleases) (accessed 17 Mar 2021).  
36
- 37 26 IBM Corp. Released 2013. IBM SPSS Statistics for Windows, Version 22.0. Armonk, NY: IBM  
38 Corp.  
39
- 40 27 Gomes M, Ng ES-W, Grieve R, *et al.* Developing appropriate methods for cost-effectiveness  
41 analysis of cluster randomized trials. *Med Decis Making* 2012;**32**:350–61.  
42 doi:10.1177/0272989X11418372  
43
- 44 28 StataCorp. Stata Statistical Software: Release 15. College Station, TX: StataCorp LLC. 2017.  
45
- 46 29 Briggs AH, O'Brien BJ, Blackhouse G. Thinking Outside the Box: Recent Advances in the  
47 Analysis and Presentation of Uncertainty in Cost-Effectiveness Studies. *Annu Rev Public*  
48 *Health* 2002;**23**:377–401. doi:10.1146/annurev.publhealth.23.100901.140534  
49
- 50 30 Fenwick E, O'Brien BJ, Briggs A. Cost-effectiveness acceptability curves – facts, fallacies and  
51 frequently asked questions. *Health Econ* 2004;**13**:405–15.  
52 doi:<https://doi.org/10.1002/hec.903>  
53
- 54 31 Husereau D, Drummond M, Petrou S, *et al.* Consolidated Health Economic Evaluation  
55 Reporting Standards (CHEERS)—Explanation and Elaboration: A Report of the ISPOR Health  
56 Economic Evaluation Publication Guidelines Good Reporting Practices Task Force. *Value Heal*  
57 2013;**16**:231–50. doi:<https://doi.org/10.1016/j.jval.2013.02.002>  
58
- 59 32 Harron K, Mok Q, Dwan K, Ridyard CH, Moitt T, Millar M, Ramnarayan P, Tibby SM, Muller-  
60 Pebody B, Hughes DA, Gamble C, Gilbert, RE. CATHeter Infections in Children (CATCH): a

- 1  
2  
3 randomised controlled trial and economic evaluation comparing impregnated and standard  
4 central venous catheters in children. *Health Technol Assess (Rockv)* 2016;**20(18)**:1–219.  
5 doi:10.3310/hta20180  
6
- 7 33 Chen G, Ratcliffe J. A Review of the Development and Application of Generic Multi-Attribute  
8 Utility Instruments for Paediatric Populations. *Pharmacoeconomics* 2015;**33**:1013–28.  
9 doi:10.1007/s40273-015-0286-7  
10
- 11 34 Nordwall M, Abrahamsson M, Dhir M, *et al.* Impact of HbA<sub>1c</sub>,  
12 Followed From Onset of Type 1 Diabetes, on the Development of Severe Retinopathy and  
13 Nephropathy: The VISS Study (Vascular Diabetic Complications in Southeast Sweden).  
14 *Diabetes Care* 2015;**38**:308 LP – 315. doi:10.2337/dc14-1203  
15
- 16 35 Virk SA, Donaghue KC, Cho YH, *et al.* Association Between HbA<sub>1c</sub> Variability and Risk of  
17 Microvascular Complications in Adolescents With Type 1 Diabetes. *J Clin Endocrinol Metab*  
18 2016;**101**:3257–63. doi:10.1210/jc.2015-3604  
19
- 20 36 Ismail K, Maissi E, Thomas S, Chalder T, Schmidt U, Bartlett J, Patel A, Dickens C, Creed F,  
21 Treasure J. A randomised controlled trial of cognitive behaviour therapy and motivational  
22 interviewing for people with Type 1 diabetes mellitus with persistent sub-optimal glycaemic  
23 control: a Diabetes and Psychological Therapies (ADaPT) study. *Health Technol Assess (Rockv)*  
24 2010;**14(22)**:1–101. doi:10.3310/hta14220  
25
- 26 37 Valentine WJ, Pollock RF, Saunders R, Bae J, Norrbacka K, Boye K. The Prime Diabetes Model:  
27 Novel Methods for Estimating Long-Term Clinical and Cost Outcomes in Type 1 Diabetes  
28 Mellitus. *Value Heal* 2017;**20(7)**:985–91. doi:10.1016/j.jval  
29
- 30 38 Ridyard CH, Hughes DA. Methods for the Collection of Resource Use Data within Clinical  
31 Trials: A Systematic Review of Studies Funded by the UK Health Technology Assessment  
32 Program. *Value Heal* 2010;**13**:867–72. doi:https://doi.org/10.1111/j.1524-4733.2010.00788.x  
33
- 34 39 Andronis L, Maredza M, Petrou S. Measuring, valuing and including forgone childhood  
35 education and leisure time costs in economic evaluation: Methods, challenges and the way  
36 forward. *Soc Sci Med* 2019;**237**:112475.  
37 doi:https://doi.org/10.1016/j.socscimed.2019.112475  
38  
39

## Figure Legends

### Figure 1

Cost-effectiveness plane of base case analysis

Reduction in HbA<sub>1c</sub> represents improvement.

- = point estimate ICER £7,434 per mmol/mol reduction of HbA<sub>1c</sub> (-0.294, -£2,182)

### Figure 2

Cost-effectiveness acceptability curve for base case analysis. Represents the probability of home management being cost-effective at different willingness to pay thresholds.



1  
2  
3  
4  
5  
6  
7  
8  
9  
10  
11  
12  
13  
14  
15  
16  
17  
18  
19  
20  
21  
22  
23  
24  
25  
26  
27  
28  
29  
30  
31  
32  
33  
34  
35  
36  
37  
38  
39  
40  
41  
42  
43  
44  
45  
46  
47  
48  
49  
50  
51  
52  
53  
54  
55  
56  
57  
58  
59  
60

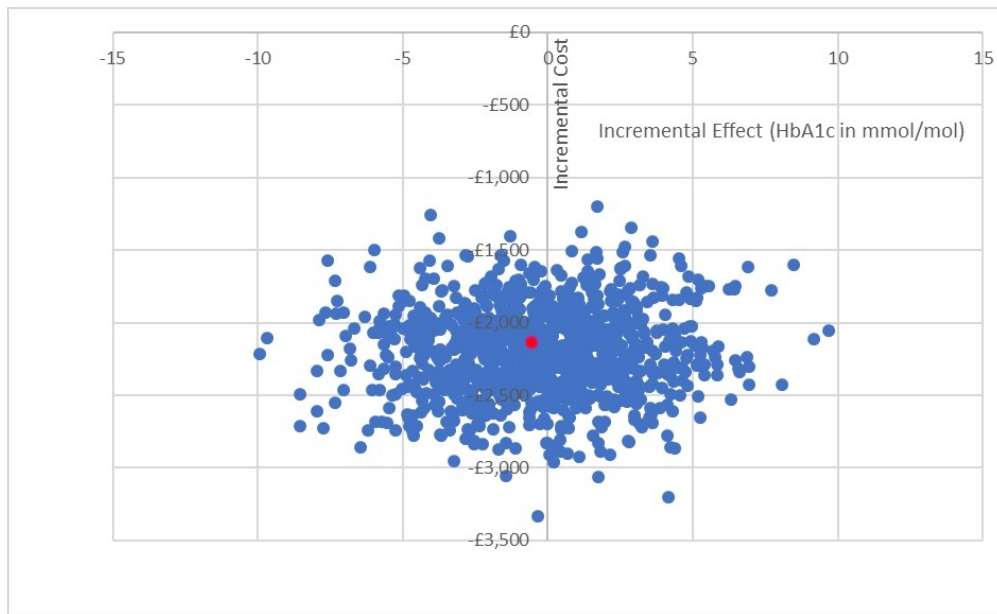

Figure 1  
 Cost-effectiveness plane of base case analysis  
 Reduction in HbA1c represents improvement.  
 • = point estimate ICER £7,434 per mmol/mol reduction of HbA1c (-0.294, -£2,182)

159x97mm (150 x 150 DPI)

1  
2  
3  
4  
5  
6  
7  
8  
9  
10  
11  
12  
13  
14  
15  
16  
17  
18  
19  
20  
21  
22  
23  
24  
25  
26  
27  
28  
29  
30  
31  
32  
33  
34  
35  
36  
37  
38  
39  
40  
41  
42  
43  
44  
45  
46  
47  
48  
49  
50  
51  
52  
53  
54  
55  
56  
57  
58  
59  
60

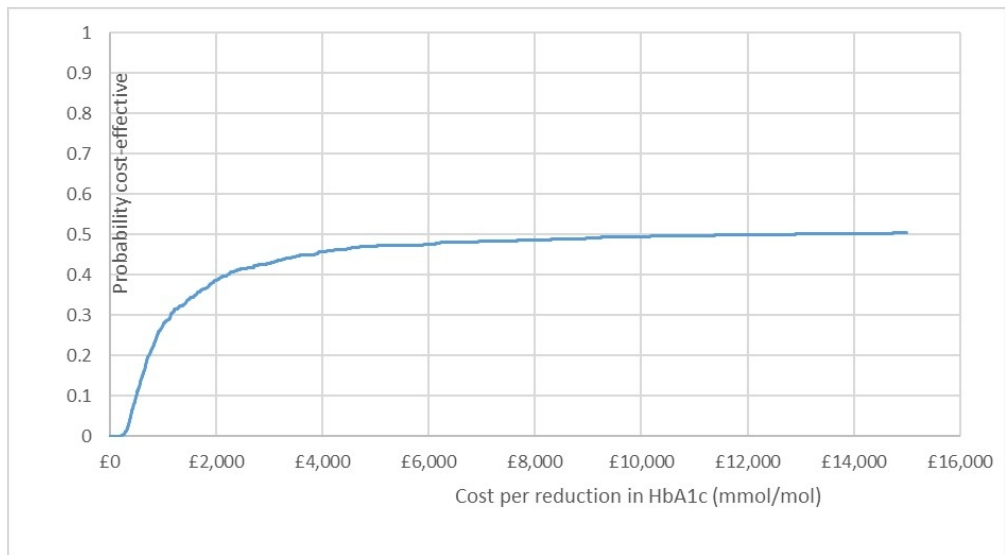

Figure 2  
Cost-effectiveness acceptability curve for base case analysis. Represents the probability of home management being cost-effective at different willingness to pay thresholds.

159x87mm (150 x 150 DPI)

1  
2  
3  
4  
5  
6  
7  
8  
9  
10  
11  
12  
13  
14  
15  
16  
17  
18  
19  
20  
21  
22  
23  
24  
25  
26  
27  
28  
29  
30  
31  
32  
33  
34  
35  
36  
37  
38  
39  
40  
41  
42  
43  
44  
45  
46  
SUPPLEMENTARY MATERIALS

Table 1 Case Report Forms and Data Collected

| Case Report Form        | Data Collected                                                                                                                                                                                   |
|-------------------------|--------------------------------------------------------------------------------------------------------------------------------------------------------------------------------------------------|
| 2 & 3                   | <ul style="list-style-type: none"><li>• Admission/discharge</li><li>• Additional tests</li><li>• Insulin Regimen</li><li>• Contacts with diabetes team</li></ul>                                 |
| 4, 5 & 6                | <ul style="list-style-type: none"><li>• Insulin regime</li><li>• Medical equipment</li><li>• Contact with diabetes team</li><li>• Hospital contacts</li><li>• Contacts with other HCPs</li></ul> |
| 7                       | <ul style="list-style-type: none"><li>• Additional tests</li><li>• Insulin regime</li><li>• Contact with diabetes team</li><li>• Hospital contacts</li><li>• Contacts with other HCPs</li></ul>  |
| 3.1, 4.1, 5.1, 6.1, 7.1 | <ul style="list-style-type: none"><li>• Time off work/school</li><li>• Travel expenses</li></ul>                                                                                                 |

**Table 2 Unit costs for contact with healthcare professionals**

| Contact with Healthcare Professional         | Unit Cost (£) | Source                      |
|----------------------------------------------|---------------|-----------------------------|
| <b>Hospital based care</b>                   |               |                             |
| Overnight stay in hospital (up to 5days)     | 894.00        | NHS Reference Costs 2019/20 |
| Overnight stay in hospital (exceeding 5days) | 417.00        |                             |
| Consultant ward visit                        | 109.00        | PSSRU 2019                  |
| Junior Doctor ward visit                     | 29.00         |                             |
| Nurse ward visit                             | 47.00         |                             |
| Dietitian ward visit                         | 46.00         |                             |
| Hospital Pharmacist                          | 6.92          |                             |
| <b>Home based care</b>                       |               |                             |
| Initial home visit                           | 220.00        | PSSRU 2019                  |
| Community Nurse home visit                   | 55.00         |                             |
| Community Nurse telephone calls & emails     | 12.25         |                             |
| Practice Nurse clinic visit                  | 6.45          |                             |
| Practice Nurse telephone calls & emails      | 4.59          |                             |
| Dietitian home visit                         | 16.00         | PSSRU 2010,2019             |
| Dietitian telephone calls & emails           | 5.25          | PSSRU 2019                  |
| GP home visit                                | 85.00         |                             |
| GP Surgery visit                             | 39.23         |                             |
| Telephone calls                              | 17.00         |                             |
| Consultant-led Outpatient attendance         | 205.00        |                             |
| Non-Consultant-led outpatient attendance     | 155.00        |                             |

Table 3 Unit Costs of Contact with Health Care Professionals

| Resource item                            | Details                                                                                                                                                                                  | Cost source | Unit Cost (£) |
|------------------------------------------|------------------------------------------------------------------------------------------------------------------------------------------------------------------------------------------|-------------|---------------|
| <b>Hospital Based Care</b>               |                                                                                                                                                                                          |             |               |
| Overnight stay in Hospital               | NHS Reference cost 2019/20 PK68C CC Score 0, cost of combined day case/ordinary elective spell.                                                                                          | a           | 894.00        |
|                                          | Per day long stay payment (for days exceeding trim point of 5 days).                                                                                                                     | a           | 417.00        |
| Consultant ward visit                    | Medical Consultant, hourly rate.                                                                                                                                                         | b           | 109.00        |
| Junior Doctor ward visit                 | Foundation House Officer Year 1, hourly rate.                                                                                                                                            | b           | 29.00         |
| Nurse ward visit                         | Nurse team leader, hourly rate.                                                                                                                                                          | b           | 47.00         |
| Dietitian ward visit                     | Hospital Dietitian, Average visit 1hour, hourly rate (Band 6).                                                                                                                           | b           | 46.00         |
| Hospital Pharmacist                      | £45 per hour. Assumed length of consultation same as GP = 9.22minutes. = £6.92.                                                                                                          | b           | 6.92          |
| <b>Home Based Care</b>                   |                                                                                                                                                                                          |             |               |
| Initial home visit                       | Community Nurse, hourly rate £55.2 hourly visits. 2 x daily to supervise injections.                                                                                                     | b           | 220.00        |
| Community Nurse home visit               | PSSRU 2019: Band 7 =£55.00 per hour.                                                                                                                                                     | b           | 55.00         |
| Community Nurse telephone calls & emails | Patient-related work, hourly rate £112 (Band 7). Average length of Nurse-led telephone triage = 6.56minutes.                                                                             | b           | 12.25         |
| Practice Nurse clinic visit              | Hourly rate £42 per hour. Assumed surgery length same as GPs = 9.22minutes.                                                                                                              | b           | 6.45          |
| Practice Nurse telephone calls & emails  | Hourly rate £42 per hour. Average length of Nurse-led telephone triage = 6.56minutes.                                                                                                    | b           | 4.59          |
| Dietitian home visit                     | No rates for Community Dietician. Community Occupational Therapist hourly rate = £48 per hour. No information for average length of visit. If assume 20minutes from PSSRU 2010 = £16.00. | b, c        | 16.00         |
| Dietitian telephone calls & emails       | Hourly rate £48.00. Assumed duration of 6.56minutes (same as Nurse telephone triage).                                                                                                    | b           | 5.25          |

|                                                     |                                                                                                                 |   |        |
|-----------------------------------------------------|-----------------------------------------------------------------------------------------------------------------|---|--------|
| GP home visit                                       | £255/hour of patient contact. Assuming duration of 20minutes.                                                   | b | 85.00  |
| GP Surgery visit                                    | Cost per surgery consultation lasting 9.22minutes                                                               | b | 39.23  |
| Telephone calls                                     | Average length of GP-led triage is 4minutes so x hourly rate of £255                                            | b | 17.00  |
| Consultant-led Outpatient attendance                | Paediatric Consultant-led Outpatient attendance.                                                                | b | 205.00 |
| Non-Consultant-led outpatient attendance            | Paediatric non-consultant-led outpatient attendance.                                                            | b | 155.00 |
| <b>Other Contact with Health Care Professionals</b> |                                                                                                                 |   |        |
| Consultant Telephone Call                           | Hourly rate £109. Assumed duration of 6.56minutes (same as Nurse-led telephone triage).                         | b | 11.92  |
| Registrar ward visit                                | Hourly rate £47. Assumed 20minute consultation.                                                                 | b | 15.67  |
| Clinical Psychologist                               | Hourly rate.                                                                                                    | b | 54.00  |
| CAMHS Nurse                                         | Hourly rate (Band 7 Nurse).                                                                                     | b | 57.00  |
| Speech and Language Therapist                       | Hourly rate (Band 6).                                                                                           | b | 46.00  |
| Physiotherapist                                     | Scientific and professional staff. Hourly rate (Band 6).                                                        | b | 45.00  |
| Podiatrist                                          | Hospital-based scientific and professional staff. Hourly rate (Band 6).                                         | b | 46.00  |
| Family Advocate                                     | Not rates for general family advocate. Advocacy for parents requiring learning disability support. Hourly rate. | b | 31.00  |
| Dentist                                             | Hourly rate £104. Assumed duration same as GP = 9.22minutes.                                                    | b | 15.98  |
| Osteopath                                           | No rates for osteopath. Scientific and Professional Staff. Hourly rate (Band 5).                                | b | 34.00  |
| Phlebotomist                                        | No rates for phlebotomist. Nurse (Band 4). Hourly rate £28. Assumed duration same as GP = £9.22.                | b | 4.30   |

Table 4 Unit costs for Insulin

| Insulin                       | Details                                                                                                                                                                                       | Cost Source | Unit Cost (£) |
|-------------------------------|-----------------------------------------------------------------------------------------------------------------------------------------------------------------------------------------------|-------------|---------------|
| Mixtard 30                    | Discontinued on 31 Dec 2010. Previously available as 5 x prefilled 3ml <i>InnoLet</i> ® £19.87 (range 2-78 units).                                                                            | d, e        | 19.87         |
| Novomix 30                    | 5 x FlexPen 100units/ml suspension for injection 3ml pre-filled pen = £29.89.                                                                                                                 | e           | 29.89         |
| Humulin M3                    | 5 x Humulin M3 KwikPen 100units/ml suspension for injection 3ml pre-filled pen (Eli Lilly and Company Ltd).                                                                                   | e           | 21.70         |
| Insulin Aspart (Novorapid)    | 5 x NovoRapid FlexTouch 100units/ml solution for injection 3ml pre-filled pen (Novo Nordisk Ltd) = £32.13.                                                                                    | e           | 32.13         |
| Insulin Lispro (Humalog)      | 5 x Humalog KwikPen 100units/ml solution for injection 3ml pre-filled pen (Eli Lilly and Company Ltd) = £29.46.                                                                               | e           | 29.46         |
| Actrapid                      | Actrapid 100units/ml for injection 10ml vials (Novo Nordisk Ltd), 100 units per 1ml, net price 10mL vial = £7.48. Novopen devices no longer available so previous price of £26.86 used.       | e           | 34.34         |
| Insulin Detemir (Levemir)     | 5 x Levemir InnotLet 100units/ml solution for injection 3ml pre-filled pen (Novo Nordisk Ltd) = £42                                                                                           | e           | 44.85         |
| Insulin Glargine (Lantus)     | 5 x Lantus 100units/ml solution for injection 3ml pre-filled SoloStar pen (Sanofi) = £37.77                                                                                                   | e           | 37.77         |
| Isophane Insulin (Insulatard) | 5 x Insulatard InnoLet 100units/ml suspension for injection 3ml pre-filled pen (Novo Nordisk Ltd) = £20.40 NHS                                                                                | e           | 20.40         |
| Humalog Mix 25                | Humalog Mix25 KwikPen 100units/ml suspension for injection 3ml pre-filled pen (Eli Lilly and Company Ltd)<br>5 x Insulin lispro 75 unit per 1 ml and Insulin lispro 25 unit per 1 ml = £30.98 | e           | 30.98         |
| Humalog Mix 50                | Humalog Mix50 KwikPen 100units/ml suspension for injection 3ml pre-filled pen (Eli Lilly and Company Ltd)<br>5 x Insulin lispro 50 unit per 1 ml = £30.98                                     | e           | 30.98         |
| Humulin I                     | Humulin I KwikPen 100units/ml suspension for injection 3ml pre-filled pen (Eli Lilly and Company Ltd)<br>5 x Insulin human (as Insulin isophane humane) 100 unit per ml = £21.70              | e           | 21.70         |

Table 5 Unit costs for tests and investigations

| Test and Investigations | Details                                                     | Cost Source | Unit Cost (£) |
|-------------------------|-------------------------------------------------------------|-------------|---------------|
| Blood Gas               |                                                             | f           | 4.86          |
| Thyroid Function        |                                                             | f           | 3.02          |
| Anti TTG                | Anti-tissue Transglutaminase Antibodies test                | f           | 12.35         |
| IgA P                   | Immunoglobulin A test                                       | f           | 4.62          |
| Islet cell Antibodies   | Islet Antigen 2 Antibody                                    | f           | 23.16         |
| GAD Antibodies          | Glutamic Acid Decarboxylase Autoantibodies test (Send away) | f, g        | 22.06         |
| U&E                     | Urea and Electrolytes                                       | f           | 3.92          |
| Chest X ray             |                                                             | i           | 11.00         |
| LFT                     | Liver Function Test                                         | f           | 4.76          |
| FBC                     | Full Blood Count                                            | f           | 4.23          |
| Urine culture           |                                                             | f           | 13.60         |
| anti tpo                | Thyroid peroxidase IgG Ab                                   | f           | 3.21          |
| APTT                    | Activated Partial Thromboplastin Time test                  | f           | 3.52          |
| C Peptide               |                                                             | f           | 22.50         |
| Coeliac Screen          | IgA Tissue Transglutaminase antibody                        | f           | 12.35         |
| CRP                     | C-Reactive Protein                                          | f           | 3.21          |
| ECG                     | Electrocardiogram                                           | g           | 9.56          |
| Ferritin                |                                                             | f           | 4.71          |
| HBA1C                   |                                                             | f           | 2.42          |
| ICCP                    | Anti-MCV Antibodies                                         | f           | 6.96          |
| Lipid Profile           |                                                             | f           | 3.92          |
| MRSA                    | Methicillin-resistant Staphylococcus aureus test            | f           | 18.52         |
| Pancreatic Cabs         | Anti-GAD                                                    | f           | N/A           |
| Plasma Osmolality       |                                                             | f           | 6.16          |
| Thyroid Antibodies      |                                                             | f           | 3.21          |
| Amylase                 |                                                             | f           | 1.35          |



|    |                                |                                                                                                                     |      |       |
|----|--------------------------------|---------------------------------------------------------------------------------------------------------------------|------|-------|
| 1  | Anti TPO                       | Anti-thyroid peroxidase test                                                                                        | f    | 3.21  |
| 2  | Bilirubin                      | Total                                                                                                               | f    | 1.35  |
| 3  | Glucose                        |                                                                                                                     | f    | 1.35  |
| 4  | Magnesium                      |                                                                                                                     | f    | 1.35  |
| 5  | Others                         | Blood culture                                                                                                       | h    | 7.33  |
| 6  |                                | Insulin                                                                                                             | h    | 2.25  |
| 7  |                                | Sickle cell                                                                                                         | h    | 8.28  |
| 8  |                                | Urine ketones                                                                                                       | h    | 3.21  |
| 9  |                                | Viral titres                                                                                                        | h    | 11.59 |
| 10 |                                | 3 Hydroxybutyrate                                                                                                   | h    | 3.76  |
| 11 |                                | X TRT                                                                                                               | h    | 4.50  |
| 12 |                                | Serum Chloride                                                                                                      | h    | 1.44  |
| 13 |                                | Lactate                                                                                                             | h    | 1.44  |
| 14 |                                | Bone profile                                                                                                        | h    | 5.11  |
| 15 |                                | Blood film                                                                                                          | h    | 6.48  |
| 16 | Urine dip                      | h                                                                                                                   | 3.50 |       |
| 17 | Rheumatoid Factor              | h                                                                                                                   | 8.43 |       |
| 18 | Blood glucose testing strips   | Based on average cost of strips (£696.96 / 64 = £10.89)                                                             | e    | 10.89 |
| 19 | Blood glucose testing cassette | Betacheck C50 cassette: 100 device = £29.98<br>Mobile cassette: 50 device = £9.99 (Assumed 50 strips unless stated) | e    | 9.99  |
| 20 | Urine ketone testing strips    | Based on average cost (2.25+3.06/2 = £2.66).                                                                        | e    | 2.66  |
| 21 | Blood ketone testing strips    | Based on average cost of ketone testing strips.                                                                     | e    | 16.95 |
| 22 | Lancets (pack of 100)          | Based on average cost of pack of 100.                                                                               | j    | 3.93  |
| 23 | Lancets (pack of 204)          | FastClix (Roche Diabetes Care Ltd.)                                                                                 | j    | 5.90  |
| 24 | Hypostop/glucogel              | GlucoGel 40% gel original (BBI Healthcare Ltd): Glucose 400mg per 1g - 75gram = £7.16                               | e    | 7.16  |
| 25 | Glucagon                       | Glucagon hydrochloride 1mg: 1 vial = £11.52                                                                         | e    | 11.52 |
| 26 | Insulin needles                | Pack of 100 Safety needles 0.3ml or 0.5ml syringe and needle = £13.34                                               | j    | 13.34 |
| 27 | Insulin pens                   | Based on average cost of insulin pens.                                                                              | e    | 19.35 |

|            |                       |   |      |
|------------|-----------------------|---|------|
| Sharps bin | Sharpsafe 1L = £0.85. | j | 0.85 |
|------------|-----------------------|---|------|

References:

- a) NHS Improvement and NHS England. Annex A: The national tariff workbook. 2020 [Accessed 10/03/2020]. Available from: <https://improvement.nhs.uk/resources/national-tariff/>
- b) Curtis, Lesley A. and Burns, Amanda (2019) Unit Costs of Health and Social Care 2019. Unit Costs of Health and Social Care. PSSRU, Kent, UK, 176 pp. ISBN 978-1-911353-10-2. <https://kar.kent.ac.uk/79286/1/UCFinalFeb20.pdf>
- c) Curtis L. Unit Costs of Health and Social Care 2010. University of Kent, Canterbury: Personal Social Services Research Unit; 2010. [https://www.pssru.ac.uk/pub/uc/uc2010/uc2010\\_s10.pdf](https://www.pssru.ac.uk/pub/uc/uc2010/uc2010_s10.pdf)
- d) Barton, J & Saunders J (2010) Discontinuation of Mixtard® 30 Insulin Products, Aneurin Bevan Health Board (August 2010) [Accessed: 10/03/2020]. Available from: <http://www.wales.nhs.uk/sites3/docopen.cfm?orgid=814&id=161224>
- e) NICE. BNF for Children: British National Formulary. NICE; 2020 [accessed 10/03/2020]. Available from: <https://bnfc.nice.org.uk/>
- f) Cardiff and Vale University Health Board, Biochemistry and Immunology Dept, University Hospital of Wales. (Personal communication).
- g) (Inflated)\* NICE. Appendix M: Routine preoperative tests for elective surgery. Centre NCG; 2015 [accessed 10/03/2020]. Available from: <https://www.nice.org.uk/guidance/ng45/history/>
- h) (Inflated)\* from previous cost supplied by 2012 Cwm Taf Health Board
- i) Personal communication with Swansea Bay Health Board
- j) NHS. NHS Electronic Drug Tariff. NHS Business Services Authority; 2020. <http://www.drugtariff.nhsbsa.nhs.uk/#/00774110-DC/DC00773743#d2e9682/Part%20IXA-Appliances>

\*Costs inflated using the CCEMG-EPPI-Centre Cost Converter. Available at: <http://eppi.ioe.ac.uk/costconversion/default.aspx>

Table 6 Unit costs for patient/carer borne costs

| Resource item       | Details                                                                                                                                                                          | Cost source | Unit cost (£) |
|---------------------|----------------------------------------------------------------------------------------------------------------------------------------------------------------------------------|-------------|---------------|
| Time off work       | Median weekly earnings £585 April 2019<br>Daily wage (£585 divided by 5 = £117)                                                                                                  | a           | 117.00        |
| Time off school     | Total annual spending per pupil of £5,872; Divided by the number of school days in a year (195) = a cost of £30.11 per day missed                                                | b           | 30.11         |
| Travelling by car   | AA Mileage calculator used to calculate miles travelled in 1 hour = 48.9miles.<br>Average price per mileage = £1.238.<br>Average miles per gallon = 50.5mpg.<br>= £5.44 per hour | c, d, e     | 5.44          |
| Travelling by bus   | Captured by OOP£                                                                                                                                                                 |             |               |
| Travelling by train | Captured by OOP£                                                                                                                                                                 |             |               |
| Travelling by taxi  | Captured by OOP£                                                                                                                                                                 |             |               |

**References:**

- Office for National Statistics. Employee earnings in the UK. Office for National Statistics –; 2019 [accessed 10/03/2020]. Available from: <https://www.ons.gov.uk/employmentandlabourmarket/peopleinwork/earningsandworkinghours/bulletins/annualsurveyofhoursandearnings/2019>
- Belfield, C. F., C. Sibieta, L. 2018. Annual Report on Education Spending in England. In: Payne, J. ed. London: The Institute for Fiscal Studies. (2018-2019 prices).
- Automobile Association Developments Ltd. 2018. Mileage calculator. AA. [Accessed: 29/03/2020]. Available at: <https://www.theaa.com/driving/mileage-calculator.jsp>
- data.gov.uk. 2020. *Petrol and diesel prices*. Department for Business, Energy and Industrial Strategy. [Accessed: 29/03/2020]. Available at: <https://data.gov.uk/dataset/c174a981-b0f2-4b39-adc0-1d0a27a7d8c9/petrol-and-diesel-prices>
- RAC Foundation. 2020. *FAQs about road transport and the environment*. London. [Accessed: 29/03/2020]. Available at: <https://www.racfoundation.org/motoring-faqs/environment>

**Table 7 Other Hospital Contacts**

| Resource item      | Notes                                                                | Cost data source | Unit cost used (£) |
|--------------------|----------------------------------------------------------------------|------------------|--------------------|
| A&E                | Cost per A&E attendance.<br>Inflated from £160.                      | a                | 166.20             |
| ITU                | Paediatric ICU, basic critical care average cost                     | b                | 1,389.00           |
| HTU                | Paediatric HDU, basic critical care average cost                     | b                | 780.00             |
| Other ward         | PK68C CC Score 0, cost of combined day case/ordinary elective spell. | c                | 894.00             |
| Ambulance call out | See and treat and convey                                             | b                | 258.00             |

**References:**

- a) NHS Improvement. 2017/18 reference costs and guidance. 2018 [accessed 03/05/2020]. Available from: <https://improvement.nhs.uk/resources/reference-costs/>
- b) Curtis LAB, Amanda. Unit Costs of Health and Social Care 2019. Unit Costs of Health and Social Care. Kent, UK: PSSRU; 2019. p. 176.
- c) NHS Improvement and NHS England. Annex A: The national tariff workbook. 2020 [accessed 10/03/2020]. Available from: <https://improvement.nhs.uk/resources/national-tariff/>

**Table 8 Total Costs**

|                                               | Arm                                       |                                               |                                                         |
|-----------------------------------------------|-------------------------------------------|-----------------------------------------------|---------------------------------------------------------|
|                                               | Home management (n=98), mean (95% CI) (£) | Hospital management (n=95), mean (95% CI) (£) | Difference between Home and Hospital, mean (95% CI) (£) |
| <b>Direct Healthcare Costs Days 0-3</b>       | 1163 (1079 to 1248)                       | 3386 (3261 to 3511)                           | -2223 (-2373 to -2072)                                  |
| <b>Direct Healthcare Costs 24months</b>       | 5287 (4864 to 5709)                       | 5282 (4883 to 5680)                           | 5 (-584 to 594)                                         |
| <b>TOTAL Direct Healthcare Costs</b>          | 6450 (6004 to 6897)                       | 8668 (8255 to 9080)                           | -2217 (-2825 to -1609)                                  |
| <b>Patient/carer Costs Days 0-3</b>           | 331 (280 to 383)                          | 352 (292 to 412)                              | -21 (-101 to 59)                                        |
| <b>Patient/carer Costs 24months</b>           | 1420 (1134 to 1705)                       | 1737 (1207 to 2267)                           | -317 (-916 to 281)                                      |
| <b>TOTAL Patient/carer Costs</b>              | 1751 (1448 to 2054)                       | 2089 (1547 to 2631)                           | -338 (-963 to 286)                                      |
| <b>TOTAL Healthcare + Patient/carer Costs</b> | 8201 (7585 to 8817)                       | 10757 (10050 to 11463)                        | -2556 (-3494 to -1618)                                  |

Table 9 DIRECT COSTS (NHS): Initiation Period (Days 0-3)

| Variable                          | Arm        | Observed Coef.(£) | Bootstrap Std. Error.(£) | z (£) | P> z  | Normal-based [95% CI] (£) |          |
|-----------------------------------|------------|-------------------|--------------------------|-------|-------|---------------------------|----------|
| <b>Contact with Diabetes Team</b> | Home       | 974               | 43                       | 23    | 0.000 | 889                       | 1059     |
|                                   | Hospital   | 720               | 32                       | 23    | 0.000 | 658                       | 782      |
|                                   | Difference | 254               | 55                       | 5     | 0.000 | 147                       | 361      |
| <b>Other Health Professionals</b> | Home       | 0                 | 0                        | 1     | 0.322 | -0                        | 0        |
|                                   | Hospital   | 1                 | 1                        | 1     | 0.202 | -1                        | 4        |
|                                   | Difference | -1                | 1                        | -1    | 0.219 | -4                        | 1        |
| <b>Tests and Investigations</b>   | Home       | 55                | 3                        | 18    | 0.000 | 49                        | 61       |
|                                   | Hospital   | 62                | 3                        | 21    | 0.000 | 56                        | 67       |
|                                   | Difference | -7                | 4                        | -2    | 0.103 | -15                       | 1        |
| <b>Hospital Stay</b>              | Home       | 0                 | -                        | -     | -     | -                         | -        |
|                                   | Hospital   | 2583              | 61                       | 43    | 0.000 | 2464                      | 2702     |
|                                   | Difference | -2583             | 61                       | -42   | 0.000 | -2702                     | -2463    |
| <b>Nurse Travel</b>               | Home       | 133               | 13                       | 10    | 0.000 | 107                       | 159      |
|                                   | Hospital   | 18                | 5                        | 3     | 0.001 | 8                         | 28       |
|                                   | Difference | 115               | 14                       | 8     | 0.000 | 86                        | 143      |
| <b>Dietician Travel</b>           | Home       | 3                 | 1                        | 3     | 0.001 | 1                         | 5        |
|                                   | Hospital   | 1                 | 1                        | 1     | 0.314 | -1                        | 2        |
|                                   | Difference | 2                 | 1                        | 2     | 0.038 | 0                         | 4.655081 |
| <b>Total Cost Days 0-3</b>        | Home       | 1163              | 43                       | 27    | 0.000 | 1079                      | 1248     |
|                                   | Hospital   | 3386              | 64                       | 53    | 0.000 | 3261                      | 3511     |
|                                   | Difference | -2223             | 77                       | -29   | 0.000 | -2373                     | -2072    |

Table 10: DIRECT COSTS (NHS): Follow-up period (24months)

| Variable                                  | Arm        | Observed Coef.(£) | Bootstrap Std. Error.(£) | z (£) | P> z   | Normal-based [95% CI] (£) |      |
|-------------------------------------------|------------|-------------------|--------------------------|-------|--------|---------------------------|------|
| <b>Equipment</b>                          | Home       | 1745              | 91                       | 19    | 0.000  | 1567                      | 1924 |
|                                           | Hospital   | 1714              | 87                       | 20    | 0.000  | 1544                      | 1883 |
|                                           | Difference | 31                | 127                      | 0     | 0.805  | -218                      | 281  |
| <b>Insulin</b>                            | Home       | 457               | 28                       | 16    | 0.000  | 402                       | 512  |
|                                           | Hospital   | 446               | 25                       | 18    | 0.000  | 397                       | 495  |
|                                           | Difference | 11                | 38                       | 0     | 0.770  | -63                       | 85   |
| <b>Tests and Investigations</b>           | Home       | 8                 | 1                        | 6     | 0.000  | 5                         | 11   |
|                                           | Hospital   | 8                 | 1                        | 6     | 0.000  | 6                         | 11   |
|                                           | Difference | -1                | 2                        | -0    | 0.968  | -4                        | 4    |
| <b>Contact with Diabetes Team (Other)</b> | Home       | 584               | 42                       | 14    | 0.000  | 502                       | 667  |
|                                           | Hospital   | 625               | 43                       | 15    | 0.000  | 541                       | 709  |
|                                           | Difference | -41               | 61                       | -1    | 0.503  | -160                      | 79   |
| <b>Outpatient contacts</b>                | Home       | 1400              | 28                       | 49    | 0.000  | 1344                      | 1455 |
|                                           | Hospital   | 1392              | 26                       | 54    | 0.000  | 1341                      | 1443 |
|                                           | Difference | 8                 | 38                       | 0     | 0.837  | -67                       | 83   |
| <b>Other health professional visits</b>   | Home       | 195               | 23                       | 8     | 0.000  | 149                       | 241  |
|                                           | Hospital   | 236               | 30                       | 8     | 0.000  | 177                       | 295  |
|                                           | Difference | -41               | 38                       | -1    | -0.276 | -115                      | 33   |
| <b>Hospital contacts</b>                  | Home       | 897               | 167                      | 5     | 0.000  | 569                       | 1225 |
|                                           | Hospital   | 860               | 157                      | 5     | 0.000  | 553                       | 1167 |
|                                           | Difference | 37                | 230                      | 0     | 0.872  | -413                      | 487  |
| <b>Contact with diabetes team</b>         | Home       | 1984              | 55                       | 36    | 0.000  | 1876                      | 2092 |
|                                           | Hospital   | 2017              | 52                       | 39    | 0.000  | 1915                      | 2119 |
|                                           | Difference | -33               | 76                       | -0    | 0.666  | -182                      | 116  |
| <b>Total Cost of Follow-up</b>            | Home       | 5288              | 216                      | 25    | 0.000  | 4864                      | 5709 |
|                                           | Hospital   | 5282              | 203                      | 26    | 0.000  | 4883                      | 5680 |
|                                           | Difference | 5                 | 300                      | 0     | 0.986  | -584                      | 594  |

Table 11: INDIRECT COSTS (patient/carer): Initiation period (days 0-3)

| Variable                      | Arm        | Observed Coef.(£) | Bootstrap Std. Error.(£) | z (£) | P> z  | Normal-based [95% CI] (£) |     |
|-------------------------------|------------|-------------------|--------------------------|-------|-------|---------------------------|-----|
| <b>Days off work</b>          | Home       | 250               | 24                       | 10    | 0.000 | 203                       | 297 |
|                               | Hospital   | 256               | 28                       | 9     | 0.000 | 201                       | 310 |
|                               | Difference | -5                | 37                       | -0    | 0.885 | -77                       | 66  |
| <b>Travel</b>                 | Home       | 11                | 1                        | 14    | 0.000 | 9                         | 12  |
|                               | Hospital   | 18                | 1                        | 13    | 0.000 | 15                        | 21  |
|                               | Difference | -8                | 2                        | -5    | 0.000 | -11                       | -4  |
| <b>Out of pocket expenses</b> | Home       | 8                 | 1                        | 10    | 0.000 | 7                         | 10  |
|                               | Hospital   | 22                | 3                        | 8     | 0.000 | 17                        | 27  |
|                               | Difference | -14               | 3                        | -5    | 0.000 | -19                       | -8  |
| <b>Days off school</b>        | Home       | 65                | 5                        | 14    | 0.000 | 56                        | 75  |
|                               | Hospital   | 57                | 5                        | 11    | 0.000 | 47                        | 67  |
|                               | Difference | 8                 | 7                        | 1     | 0.230 | -5                        | 22  |
| <b>Total Cost Days 0-3</b>    | Home       | 331               | 26                       | 13    | 0.000 | 280                       | 383 |
|                               | Hospital   | 352               | 31                       | 11    | 0.000 | 292                       | 412 |
|                               | Difference | -21               | 41                       | -1    | 0.607 | -101                      | 59  |

Table 12: INDIRECT COSTS (patient/carer): Follow-up period (24months)

| Variable                        | Arm        | Observed Coef.(£) | Bootstrap Std. Error.(£) | z (£) | P> z  | Normal-based [95% CI] (£) |      |
|---------------------------------|------------|-------------------|--------------------------|-------|-------|---------------------------|------|
| <b>Days off work</b>            | Home       | 869               | 132                      | 7     | 0.000 | 609                       | 1128 |
|                                 | Hospital   | 1180              | 256                      | 5     | 0.000 | 679                       | 1681 |
|                                 | Difference | -312              | 285                      | -1    | 0.274 | -871                      | 247  |
| <b>Travel</b>                   | Home       | 63                | 4                        | 17    | 0.000 | 56                        | 71   |
|                                 | Hospital   | 61                | 6                        | 10    | 0.000 | 49                        | 72   |
|                                 | Difference | 3                 | 7                        | 0     | 0.692 | -11                       | 17   |
| <b>Out of pocket expenses</b>   | Home       | 44                | 6                        | 7     | 0.000 | 32                        | 56   |
|                                 | Hospital   | 42                | 6                        | 7     | 0.000 | 30                        | 54   |
|                                 | Difference | 2                 | 9                        | 0     | 0.782 | -15                       | 20   |
| <b>Days off school</b>          | Home       | 443               | 41                       | 11    | 0.000 | 363                       | 523  |
|                                 | Hospital   | 454               | 54                       | 8     | 0.000 | 349                       | 559  |
|                                 | Difference | -11               | 68                       | -0    | 0.873 | -143                      | 122  |
| <b>Total Costs of Follow-up</b> | Home       | 1420              | 146                      | 10    | 0.000 | 1134                      | 1705 |
|                                 | Hospital   | 1737              | 270                      | 6     | 0.000 | 1207                      | 2267 |
|                                 | Difference | -317              | 305                      | -1    | 0.299 | -916                      | 281  |

Table 13: Total Costs

| Variable                                | Arm        | Observed Coef.(£) | Bootstrap Std. Error.(£) | z (£) | P> z  | Normal-based [95% CI] (£) |       |
|-----------------------------------------|------------|-------------------|--------------------------|-------|-------|---------------------------|-------|
| <b>Patient/carer Total Cost</b>         | Home       | 1751              | 155                      | 11    | 0.000 | 1448                      | 2054  |
|                                         | Hospital   | 2089              | 277                      | 8     | 0.000 | 1547                      | 2631  |
|                                         | Difference | -338              | 319                      | -1    | 0.288 | -963                      | 286   |
| <b>Direct Healthcare Total Cost</b>     | Home       | 6450              | 228                      | 28    | 0.000 | 6004                      | 6897  |
|                                         | Hospital   | 8868              | 210                      | 41    | 0.000 | 8255                      | 9080  |
|                                         | Difference | -2217             | 310                      | -7    | 0.000 | -2825                     | -1609 |
| <b>Total Healthcare + Patient/carer</b> | Home       | 8201              | 314                      | 26    | 0.000 | 7585                      | 8817  |
|                                         | Hospital   | 10757             | 360                      | 30    | 0.000 | 10050                     | 11463 |
|                                         | Difference | -2556             | 479                      | -5    | 0.000 | -3494                     | -1618 |



Table 14 Cost Consequences Analysis (CCA)

| Costs and Consequences                   | Arm |                                       |    |                                           | Difference between Home and Hospital, mean (95% CI) (£) | P value |
|------------------------------------------|-----|---------------------------------------|----|-------------------------------------------|---------------------------------------------------------|---------|
|                                          | N   | Home management, mean (95% CI/SD) (£) | N  | Hospital management, mean (95% CI/SD) (£) |                                                         |         |
| <b>Costs Impact</b>                      |     |                                       |    |                                           |                                                         |         |
| <b>TOTAL Direct Healthcare Costs</b>     | 98  | £6450<br>(£6004 to £6897)             | 95 | £8668<br>(£8255 to £9080)                 | -£2217<br>(-£2825 to -£1609)                            | <0.05   |
| <b>TOTAL Patient/Carer Costs</b>         | 98  | £1751<br>(£1448 to £2054)             | 95 | £2089<br>(£1547 to £2631)                 | -£338<br>(-£963 to £286)                                | 0.288   |
| <b>TOTAL NHS + Patient/Carer Costs</b>   | 98  | £8201<br>(£7585 to £8817)             | 95 | £10757<br>(£10050 to 11463)               | -£2556<br>(-£3494 to -£1618)                            | <0.05   |
| <b>Health Impact</b>                     |     |                                       |    |                                           |                                                         |         |
| <b>HbA1c 24months (mmol/mol)*</b>        | 98  | 72.1 (SD = 21.7)                      | 95 | 72.6 (SD = 21.9)                          | 1.01<br>(0.93 to 1.09)                                  | 0.863   |
| <b>Physical Impact</b>                   |     |                                       |    |                                           |                                                         |         |
| <b>Physical well-being at 1month**</b>   | 68  | 63.0 (SD = 20.38)                     | 62 | 70.4 (SD = 19.07)                         | -7.5<br>(-14.3 to -0.6)                                 | 0.033   |
| <b>Physical well-being at 24months**</b> | 62  | 70.0 (SD = 17.64)                     | 58 | 71.0 (SD = 15.90)                         | -1.0<br>(-7.1 to 5.1)                                   | 0.741   |
| <b>Symptoms at 1 month***</b>            | 69  | 60.2 (SD = 14.23)                     | 62 | 62.3 (SD = 13.09)                         | -2.1<br>(-6.8 to 2.6)                                   | 0.384   |
| <b>Symptoms at 24months***</b>           | 62  | 62.0 (SD = 12.56)                     | 58 | 63.3 (SD = 14.11)                         | -1.2<br>(-5.9 to 3.6)                                   | 0.633   |
| <b>Psychological Impact</b>              |     |                                       |    |                                           |                                                         |         |
| <b>Worry at 1month***</b>                | 68  | 72.7 (SD = 24.26)                     | 63 | 74.7 (SD = 22.94)                         | -2.1<br>(-10.2 to 6.1)                                  | 0.616   |

|                                   |    |                   |    |                   |                          |       |
|-----------------------------------|----|-------------------|----|-------------------|--------------------------|-------|
| Worry at 24months***              | 62 | 73.3 (SD = 20.75) | 58 | 71.1 (SD = 23.74) | 2.1<br>(-5.9 to 10.2)    | 0.601 |
| Emotional wellbeing at 1month**   | 68 | 75.5 (SD = 17.98) | 61 | 77.6 (SD = 15.31) | -2.2<br>(-8.0 to 3.7)    | 0.464 |
| Emotional wellbeing at 24months** | 62 | 76.6 (SD = 18.18) | 58 | 78.6 (SD = 12.35) | -2.0<br>(-7.7 to 3.6)    | 0.482 |
| Self-esteem at 1month**           | 68 | 53.9 (SD = 24.19) | 61 | 64.1 (SD = 21.22) | -10.4<br>(-18.3 to -2.4) | 0.011 |
| Self-esteem at 24months**         | 62 | 63.4 (SD = 19.92) | 58 | 56.1 (SD = 18.71) | 7.2<br>(0.2 to 14.2)     | 0.043 |
| <b>Social Impact</b>              |    |                   |    |                   |                          |       |
| Communication at 1month***        | 68 | 72.9 (SD = 28.01) | 63 | 81.3 (SD = 18.25) | -8.4<br>(-16.7 to -0.2)  | 0.045 |
| Communication at 24months***      | 62 | 72.8 (SD = 25.83) | 58 | 78.2 (SD = 21.22) | -5.5<br>(-14.0 to 3.0)   | 0.200 |
| Family at 1month**                | 69 | 76.0 (SD = 17.61) | 61 | 79.7 (SD = 18.10) | -3.7<br>(-9.9 to 2.5)    | 0.242 |
| Family at 24months**              | 61 | 79.3 (SD = 17.81) | 58 | 77.9 (SD = 19.15) | 1.5<br>(-5.1 to 8.2)     | 0.507 |
| Friends at 1month**               | 69 | 79.3 (SD = 14.62) | 60 | 78.6 (SD = 16.33) | 0.5<br>(-4.8 to 5.9)     | 0.849 |
| Friends at 24months**             | 60 | 79.5 (SD = 17.03) | 58 | 77.4 (SD = 16.81) | 2.1<br>(-4.1 to 8.2)     | 0.507 |
| School at 1month**                | 65 | 67.0 (SD = 21.92) | 60 | 68.1 (SD = 18.65) | -1.1<br>(-8.3 to 6.1)    | 0.763 |
| School at 24months**              | 60 | 65.9 (SD = 17.32) | 57 | 61.5 (SD = 18.14) | 4.6<br>(-1.9 to 11.0)    | 0.163 |

\*Controlled for HbA1c at baseline. \*\*KINDL-R – parent answers about child; higher score is better. \*\*\*PedsQL 3.0 Diabetes Module – parent answers about child.

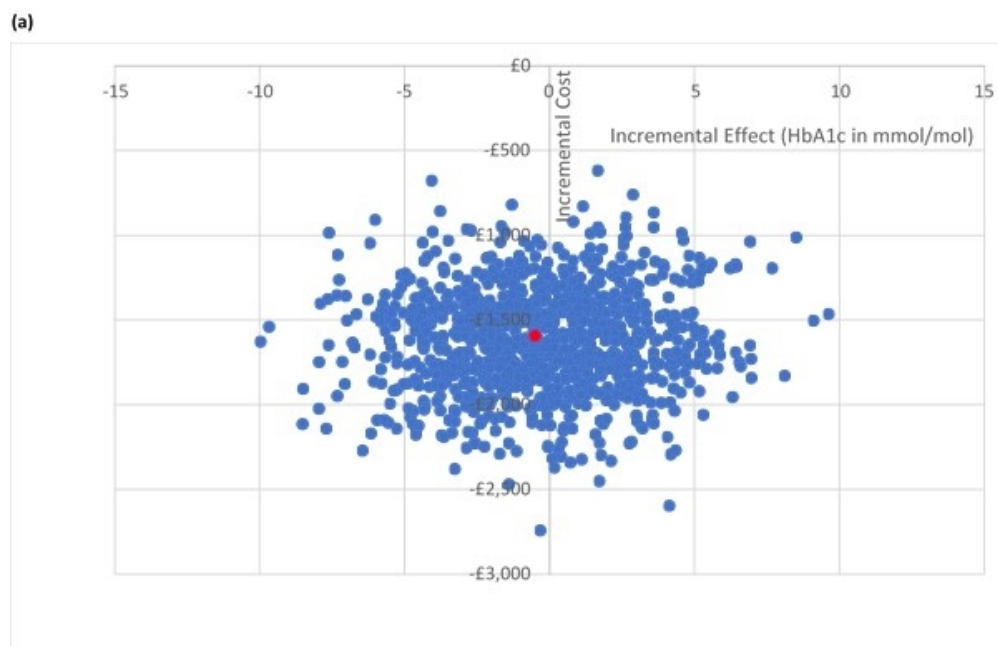

27 Supplementary material Figure 1

28 Cost-effectiveness plane of healthcare + non-healthcare costs. Reduction in HbA1c represents improvement.

- 29 • = point estimate ICER £8,585 saved per additional mmol/mol reduction of HbA1c (-0.294, -£2,520)
- 30

31 159x102mm (96 x 96 DPI)

32  
33  
34  
35  
36  
37  
38  
39  
40  
41  
42  
43  
44  
45  
46  
47  
48  
49  
50  
51  
52  
53  
54  
55  
56  
57  
58  
59  
60

1  
2  
3  
4  
5  
6  
7  
8  
9  
10  
11  
12  
13  
14  
15  
16  
17  
18  
19  
20  
21  
22  
23  
24  
25  
26  
27  
28  
29  
30  
31  
32  
33  
34  
35  
36  
37  
38  
39  
40  
41  
42  
43  
44  
45  
46  
47  
48  
49  
50  
51  
52  
53  
54  
55  
56  
57  
58  
59  
60

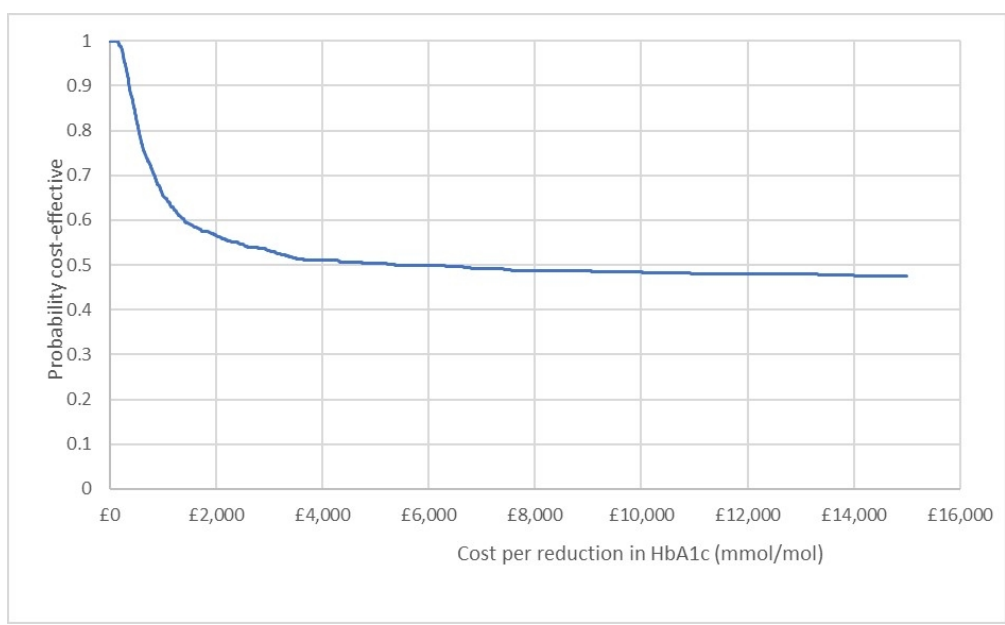

Supplementary material Figure 2  
Cost-effectiveness acceptability curve for Direct Healthcare + non-healthcare Costs analysis. Represents the probability of home management being cost-effective at different willingness to pay thresholds.

159x97mm (150 x 150 DPI)

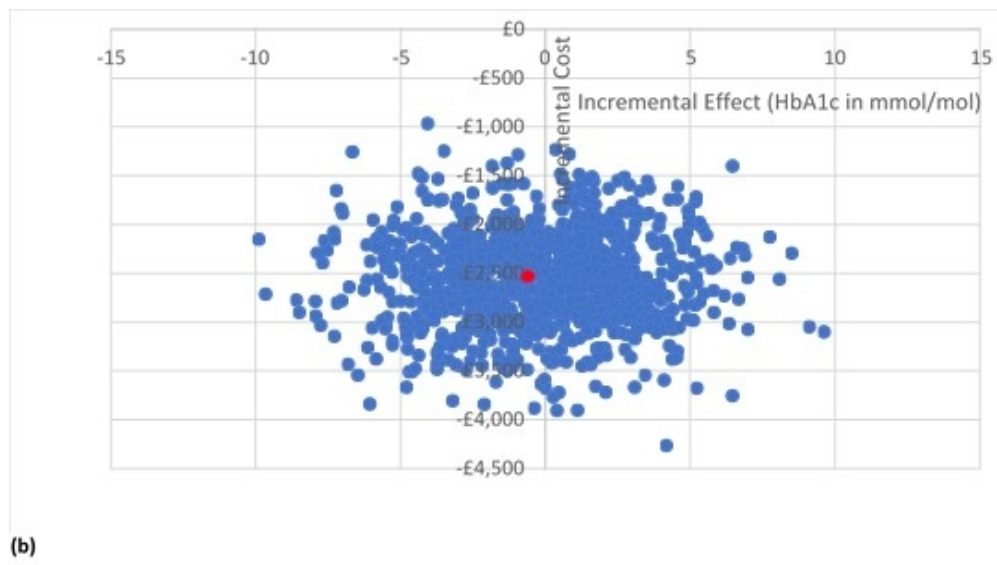

Supplementary material Figure 3

Cost-effectiveness plane of healthcare costs with sensitivity analysis. Reduction in HbA1c represents improvement. • = point estimate ICER £5,451 saved per additional mmol/mol reduction of HbA1c (-0.294, -£1,600)

143x80mm (96 x 96 DPI)

1  
2  
3  
4  
5  
6  
7  
8  
9  
10  
11  
12  
13  
14  
15  
16  
17  
18  
19  
20  
21  
22  
23  
24  
25  
26  
27  
28  
29  
30  
31  
32  
33  
34  
35  
36  
37  
38  
39  
40  
41  
42  
43  
44  
45  
46  
47  
48  
49  
50  
51  
52  
53  
54  
55  
56  
57  
58  
59  
60

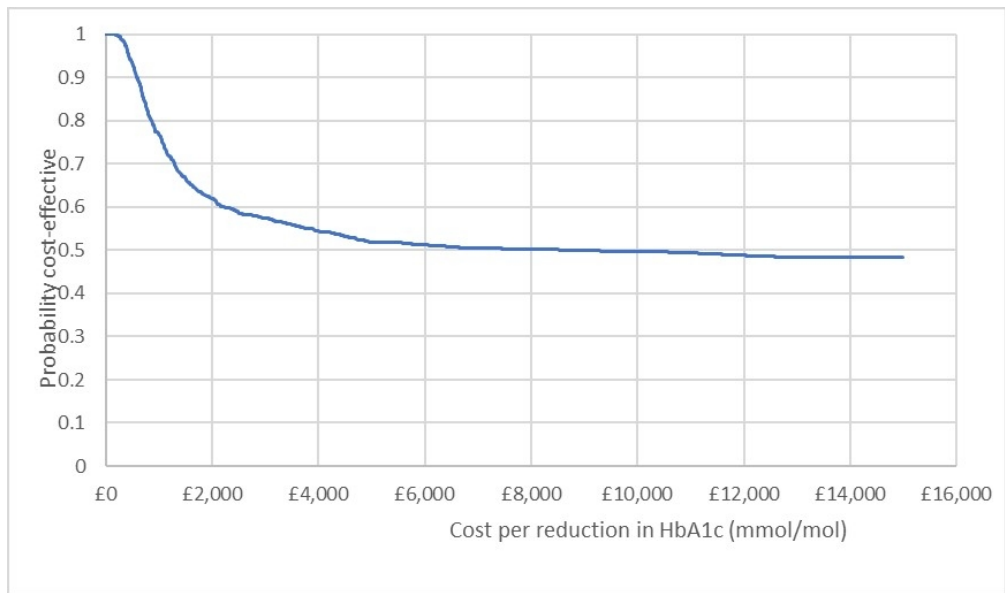

Supplementary material Figure 4  
Cost-effectiveness acceptability curve for Direct Healthcare Costs with sensitivity analysis. Represents the probability of home management being cost-effective at different willingness to pay thresholds.

146x86mm (150 x 150 DPI)

# Reporting checklist for economic evaluation of health interventions.

Based on the CHEERS guidelines.

## Instructions to authors

Complete this checklist by entering the page numbers from your manuscript where readers will find each of the items listed below.

Your article may not currently address all the items on the checklist. Please modify your text to include the missing information. If you are certain that an item does not apply, please write "n/a" and provide a short explanation.

Upload your completed checklist as an extra file when you submit to a journal.

In your methods section, say that you used the CHEERS reporting guidelines, and cite them as:

Husereau D, Drummond M, Petrou S, Carswell C, Moher D, Greenberg D, Augustovski F, Briggs AH, Mauskopf J, Loder E. Consolidated Health Economic Evaluation Reporting Standards (CHEERS) statement.

|                                                                                                                                                                                   | Page   |
|-----------------------------------------------------------------------------------------------------------------------------------------------------------------------------------|--------|
| Reporting Item                                                                                                                                                                    | Number |
| <b>Title</b>                                                                                                                                                                      |        |
| <p><a href="#">#1</a> Identify the study as an economic evaluation or use more specific terms such as “cost-effectiveness analysis”, and describe the interventions compared.</p> | 1      |

## Abstract

[#2](#) Provide a structured summary of objectives, perspective, setting, methods (including study design and inputs), results (including base case and uncertainty analyses), and conclusions

## Introduction

[#3](#) Provide an explicit statement of the broader context for the study. Present the study question and its relevance for health policy or practice decisions

## Methods

[#4](#) Describe characteristics of the base case population and subgroups analysed, including why they were chosen.

[#5](#) State relevant aspects of the system(s) in which the decision(s) need(s) to be made.

[#6](#) Describe the perspective of the study and relate this to the costs being evaluated.

[#7](#) Describe the interventions or strategies being compared and state why they were chosen.

[#8](#) State the time horizon(s) over which costs and consequences are being evaluated and say why appropriate.



|    |                  |                      |                                                           |     |
|----|------------------|----------------------|-----------------------------------------------------------|-----|
| 1  | Discount rate    | <a href="#">#9</a>   | Report the choice of discount rate(s) used for costs and  | 4   |
| 2  |                  |                      | outcomes and say why appropriate                          |     |
| 3  |                  |                      |                                                           |     |
| 4  |                  |                      |                                                           |     |
| 5  |                  |                      |                                                           |     |
| 6  | Choice of health | <a href="#">#10</a>  | Describe what outcomes were used as the measure(s)        | 5   |
| 7  | outcomes         |                      | of benefit in the evaluation and their relevance for the  |     |
| 8  |                  |                      | type of analysis performed                                |     |
| 9  |                  |                      |                                                           |     |
| 10 |                  |                      |                                                           |     |
| 11 |                  |                      |                                                           |     |
| 12 |                  |                      |                                                           |     |
| 13 |                  |                      |                                                           |     |
| 14 | Measurement of   | <a href="#">#11a</a> | Single study-based estimates: Describe fully the design   | 6   |
| 15 | effectiveness    |                      | features of the single effectiveness study and why the    |     |
| 16 |                  |                      | single study was a sufficient source of clinical          |     |
| 17 |                  |                      | effectiveness data                                        |     |
| 18 |                  |                      |                                                           |     |
| 19 |                  |                      |                                                           |     |
| 20 |                  |                      |                                                           |     |
| 21 |                  |                      |                                                           |     |
| 22 |                  |                      |                                                           |     |
| 23 |                  |                      |                                                           |     |
| 24 | Measurement of   | <a href="#">#11b</a> | Synthesis-based estimates: Describe fully the methods     | N/A |
| 25 | effectiveness    |                      | used for identification of included studies and synthesis |     |
| 26 |                  |                      | of clinical effectiveness data                            |     |
| 27 |                  |                      |                                                           |     |
| 28 |                  |                      |                                                           |     |
| 29 |                  |                      |                                                           |     |
| 30 |                  |                      |                                                           |     |
| 31 | Measurement and  | <a href="#">#12</a>  | If applicable, describe the population and methods used   | N/A |
| 32 | valuation of     |                      | to elicit preferences for outcomes.                       |     |
| 33 |                  |                      |                                                           |     |
| 34 | preference based |                      |                                                           |     |
| 35 | outcomes         |                      |                                                           |     |
| 36 |                  |                      |                                                           |     |
| 37 |                  |                      |                                                           |     |
| 38 |                  |                      |                                                           |     |
| 39 |                  |                      |                                                           |     |
| 40 |                  |                      |                                                           |     |
| 41 | **Estimating     |                      |                                                           |     |
| 42 | resources        |                      |                                                           |     |
| 43 |                  |                      |                                                           |     |
| 44 |                  |                      |                                                           |     |
| 45 |                  |                      |                                                           |     |
| 46 |                  |                      |                                                           |     |
| 47 | and costs **     |                      |                                                           |     |
| 48 |                  |                      |                                                           |     |
| 49 |                  |                      |                                                           |     |
| 50 |                  | <a href="#">#13a</a> | Single study-based economic evaluation: Describe          | 5   |
| 51 |                  |                      | approaches used to estimate resource use associated       |     |
| 52 |                  |                      | with the alternative interventions. Describe primary or   |     |
| 53 |                  |                      | secondary research methods for valuing each resource      |     |
| 54 |                  |                      |                                                           |     |
| 55 |                  |                      |                                                           |     |
| 56 |                  |                      |                                                           |     |
| 57 |                  |                      |                                                           |     |
| 58 |                  |                      |                                                           |     |
| 59 |                  |                      |                                                           |     |
| 60 |                  |                      |                                                           |     |

item in terms of its unit cost. Describe any adjustments made to approximate to opportunity costs

## Methods

|                                      |                      |                                                                                                                                                                                                                                                                                                                      |     |
|--------------------------------------|----------------------|----------------------------------------------------------------------------------------------------------------------------------------------------------------------------------------------------------------------------------------------------------------------------------------------------------------------|-----|
| Estimating resources and costs       | <a href="#">#13b</a> | Model-based economic evaluation: Describe approaches and data sources used to estimate resource use associated with model health states. Describe primary or secondary research methods for valuing each resource item in terms of its unit cost. Describe any adjustments made to approximate to opportunity costs. | N/A |
| Currency, price date, and conversion | <a href="#">#14</a>  | Report the dates of the estimated resource quantities and unit costs. Describe methods for adjusting estimated unit costs to the year of reported costs if necessary. Describe methods for converting costs into a common currency base and the exchange rate.                                                       | 5   |
| Choice of model                      | <a href="#">#15</a>  | Describe and give reasons for the specific type of decision analytical model used. Providing a figure to show model structure is strongly recommended.                                                                                                                                                               | 5   |
| Assumptions                          | <a href="#">#16</a>  | Describe all structural or other assumptions underpinning the decision-analytical model.                                                                                                                                                                                                                             | 5   |
| Analytical methods                   | <a href="#">#17</a>  | Describe all analytical methods supporting the evaluation. This could include methods for dealing with skewed, missing, or censored data; extrapolation methods; methods for pooling data; approaches to validate or make adjustments (such as half cycle                                                            | 6   |

corrections) to a model; and methods for handling population heterogeneity and uncertainty.

## Results

|                                |                      |                                                                                                                                                                                                                                                                      |     |
|--------------------------------|----------------------|----------------------------------------------------------------------------------------------------------------------------------------------------------------------------------------------------------------------------------------------------------------------|-----|
| Study parameters               | <a href="#">#18</a>  | Report the values, ranges, references, and, if used, probability distributions for all parameters. Report reasons or sources for distributions used to represent uncertainty where appropriate. Providing a table to show the input values is strongly recommended.  | 8   |
| Incremental costs and outcomes | <a href="#">#19</a>  | For each intervention, report mean values for the main categories of estimated costs and outcomes of interest, as well as mean differences between the comparator groups. If applicable, report incremental cost-effectiveness ratios.                               | 8   |
| Characterising uncertainty     | <a href="#">#20a</a> | Single study-based economic evaluation: Describe the effects of sampling uncertainty for the estimated incremental cost and incremental effectiveness parameters, together with the impact of methodological assumptions (such as discount rate, study perspective). | 8   |
| Characterising uncertainty     | <a href="#">#20b</a> | Model-based economic evaluation: Describe the effects on the results of uncertainty for all input parameters, and uncertainty related to the structure of the model and assumptions.                                                                                 | N/A |
| Characterising heterogeneity   | <a href="#">#21</a>  | If applicable, report differences in costs, outcomes, or cost effectiveness that can be explained by variations                                                                                                                                                      | N/A |

1 between subgroups of patients with different baseline  
 2 characteristics or other observed variability in effects that  
 3 are not reducible by more information.  
 4  
 5  
 6  
 7

## 8 Discussion

9  
 10  
 11 Study findings, [#22](#) Summarise key study findings and describe how they 15  
 12 limitations, support the conclusions reached. Discuss limitations and  
 13 generalisability, and the generalisability of the findings and how the findings  
 14 current knowledge fit with current knowledge.  
 15  
 16  
 17  
 18  
 19  
 20

## 21 Other

22  
 23  
 24 Source of funding [#23](#) Describe how the study was funded and the role of the 17  
 25 funder in the identification, design, conduct, and  
 26 reporting of the analysis. Describe other non-monetary  
 27 sources of support  
 28  
 29  
 30  
 31  
 32  
 33

34 Conflict of interest [#24](#) Describe any potential for conflict of interest of study 17  
 35 contributors in accordance with journal policy. In the  
 36 absence of a journal policy, we recommend authors  
 37 comply with International Committee of Medical Journal  
 38 Editors recommendations  
 39  
 40  
 41  
 42  
 43  
 44  
 45

46 None The CHEERS checklist is distributed under the terms of the Creative Commons Attribution  
 47 License CC-BY-NC. This checklist can be completed online using <https://www.goodreports.org/>, a  
 48 tool made by the [EQUATOR Network](#) in collaboration with [Penelope.ai](#)  
 49  
 50  
 51  
 52  
 53  
 54  
 55  
 56  
 57  
 58  
 59  
 60
