# Supplementary material for: Cost-effectiveness of home versus hospital management of children at onset of type 1 diabetes: the DECIDE randomised controlled trial
Source: PubMed Central journal article supplement — BMJ Open. 2021 May 19;11(5):e043523. doi: 10.1136/bmjopen-2020-043523 (PMC8137197; doi:10.1136/bmjopen-2020-043523), 2021-05-19
Supplement: bmjopen-2020-043523supp001.pdf [file bmjopen-2020-043523supp001.pdf]

## SUPPLEMENTARY MATERIALS

Table 1 Case Report Forms and Data Collected

| Case Report Form        | Data Collected                                                                                                                                                                                   |
|-------------------------|--------------------------------------------------------------------------------------------------------------------------------------------------------------------------------------------------|
| 2 & 3                   | <ul style="list-style-type: none"><li>• Admission/discharge</li><li>• Additional tests</li><li>• Insulin Regimen</li><li>• Contacts with diabetes team</li></ul>                                 |
| 4, 5 & 6                | <ul style="list-style-type: none"><li>• Insulin regime</li><li>• Medical equipment</li><li>• Contact with diabetes team</li><li>• Hospital contacts</li><li>• Contacts with other HCPs</li></ul> |
| 7                       | <ul style="list-style-type: none"><li>• Additional tests</li><li>• Insulin regime</li><li>• Contact with diabetes team</li><li>• Hospital contacts</li><li>• Contacts with other HCPs</li></ul>  |
| 3.1, 4.1, 5.1, 6.1, 7.1 | <ul style="list-style-type: none"><li>• Time off work/school</li><li>• Travel expenses</li></ul>                                                                                                 |

**Table 2 Unit costs for contact with healthcare professionals**

| Contact with Healthcare Professional         | Unit Cost (£) | Source                      |
|----------------------------------------------|---------------|-----------------------------|
| <b>Hospital based care</b>                   |               |                             |
| Overnight stay in hospital (up to 5days)     | 894.00        | NHS Reference Costs 2019/20 |
| Overnight stay in hospital (exceeding 5days) | 417.00        |                             |
| Consultant ward visit                        | 109.00        | PSSRU 2019                  |
| Junior Doctor ward visit                     | 29.00         |                             |
| Nurse ward visit                             | 47.00         |                             |
| Dietitian ward visit                         | 46.00         |                             |
| Hospital Pharmacist                          | 6.92          |                             |
| <b>Home based care</b>                       |               |                             |
| Initial home visit                           | 220.00        | PSSRU 2019                  |
| Community Nurse home visit                   | 55.00         |                             |
| Community Nurse telephone calls & emails     | 12.25         |                             |
| Practice Nurse clinic visit                  | 6.45          |                             |
| Practice Nurse telephone calls & emails      | 4.59          |                             |
| Dietitian home visit                         | 16.00         | PSSRU 2010,2019             |
| Dietitian telephone calls & emails           | 5.25          | PSSRU 2019                  |
| GP home visit                                | 85.00         |                             |
| GP Surgery visit                             | 39.23         |                             |
| Telephone calls                              | 17.00         |                             |
| Consultant-led Outpatient attendance         | 205.00        |                             |
| Non-Consultant-led outpatient attendance     | 155.00        |                             |

Table 3 Unit Costs of Contact with Health Care Professionals

| Resource item                            | Details                                                                                                                                                                                  | Cost source | Unit Cost (£) |
|------------------------------------------|------------------------------------------------------------------------------------------------------------------------------------------------------------------------------------------|-------------|---------------|
| <b>Hospital Based Care</b>               |                                                                                                                                                                                          |             |               |
| Overnight stay in Hospital               | NHS Reference cost 2019/20 PK68C CC Score 0, cost of combined day case/ordinary elective spell.                                                                                          | a           | 894.00        |
|                                          | Per day long stay payment (for days exceeding trim point of 5 days).                                                                                                                     | a           | 417.00        |
| Consultant ward visit                    | Medical Consultant, hourly rate.                                                                                                                                                         | b           | 109.00        |
| Junior Doctor ward visit                 | Foundation House Officer Year 1, hourly rate.                                                                                                                                            | b           | 29.00         |
| Nurse ward visit                         | Nurse team leader, hourly rate.                                                                                                                                                          | b           | 47.00         |
| Dietitian ward visit                     | Hospital Dietitian, Average visit 1hour, hourly rate (Band 6).                                                                                                                           | b           | 46.00         |
| Hospital Pharmacist                      | £45 per hour. Assumed length of consultation same as GP = 9.22minutes. = £6.92.                                                                                                          | b           | 6.92          |
| <b>Home Based Care</b>                   |                                                                                                                                                                                          |             |               |
| Initial home visit                       | Community Nurse, hourly rate £55.2 hourly visits. 2 x daily to supervise injections.                                                                                                     | b           | 220.00        |
| Community Nurse home visit               | PSSRU 2019: Band 7 =£55.00 per hour.                                                                                                                                                     | b           | 55.00         |
| Community Nurse telephone calls & emails | Patient-related work, hourly rate £112 (Band 7). Average length of Nurse-led telephone triage = 6.56minutes.                                                                             | b           | 12.25         |
| Practice Nurse clinic visit              | Hourly rate £42 per hour. Assumed surgery length same as GPs = 9.22minutes.                                                                                                              | b           | 6.45          |
| Practice Nurse telephone calls & emails  | Hourly rate £42 per hour. Average length of Nurse-led telephone triage = 6.56minutes.                                                                                                    | b           | 4.59          |
| Dietitian home visit                     | No rates for Community Dietician. Community Occupational Therapist hourly rate = £48 per hour. No information for average length of visit. If assume 20minutes from PSSRU 2010 = £16.00. | b, c        | 16.00         |
| Dietitian telephone calls & emails       | Hourly rate £48.00. Assumed duration of 6.56minutes (same as Nurse telephone triage).                                                                                                    | b           | 5.25          |

|                                                     |                                                                                                                 |   |        |
|-----------------------------------------------------|-----------------------------------------------------------------------------------------------------------------|---|--------|
| GP home visit                                       | £255/hour of patient contact. Assuming duration of 20minutes.                                                   | b | 85.00  |
| GP Surgery visit                                    | Cost per surgery consultation lasting 9.22minutes                                                               | b | 39.23  |
| Telephone calls                                     | Average length of GP-led triage is 4minutes so x hourly rate of £255                                            | b | 17.00  |
| Consultant-led Outpatient attendance                | Paediatric Consultant-led Outpatient attendance.                                                                | b | 205.00 |
| Non-Consultant-led outpatient attendance            | Paediatric non-consultant-led outpatient attendance.                                                            | b | 155.00 |
| <b>Other Contact with Health Care Professionals</b> |                                                                                                                 |   |        |
| Consultant Telephone Call                           | Hourly rate £109. Assumed duration of 6.56minutes (same as Nurse-led telephone triage).                         | b | 11.92  |
| Registrar ward visit                                | Hourly rate £47. Assumed 20minute consultation.                                                                 | b | 15.67  |
| Clinical Psychologist                               | Hourly rate.                                                                                                    | b | 54.00  |
| CAMHS Nurse                                         | Hourly rate (Band 7 Nurse).                                                                                     | b | 57.00  |
| Speech and Language Therapist                       | Hourly rate (Band 6).                                                                                           | b | 46.00  |
| Physiotherapist                                     | Scientific and professional staff. Hourly rate (Band 6).                                                        | b | 45.00  |
| Podiatrist                                          | Hospital-based scientific and professional staff. Hourly rate (Band 6).                                         | b | 46.00  |
| Family Advocate                                     | Not rates for general family advocate. Advocacy for parents requiring learning disability support. Hourly rate. | b | 31.00  |
| Dentist                                             | Hourly rate £104. Assumed duration same as GP = 9.22minutes.                                                    | b | 15.98  |
| Osteopath                                           | No rates for osteopath. Scientific and Professional Staff. Hourly rate (Band 5).                                | b | 34.00  |
| Phlebotomist                                        | No rates for phlebotomist. Nurse (Band 4). Hourly rate £28. Assumed duration same as GP = £9.22.                | b | 4.30   |

Table 4 Unit costs for Insulin

| Insulin                       | Details                                                                                                                                                                                       | Cost Source | Unit Cost (£) |
|-------------------------------|-----------------------------------------------------------------------------------------------------------------------------------------------------------------------------------------------|-------------|---------------|
| Mixtard 30                    | Discontinued on 31 Dec 2010. Previously available as 5 x prefilled 3ml <i>InnoLet</i> ® £19.87 (range 2-78 units).                                                                            | d, e        | 19.87         |
| Novomix 30                    | 5 x FlexPen 100units/ml suspension for injection 3ml pre-filled pen = £29.89.                                                                                                                 | e           | 29.89         |
| Humulin M3                    | 5 x Humulin M3 KwikPen 100units/ml suspension for injection 3ml pre-filled pen (Eli Lilly and Company Ltd).                                                                                   | e           | 21.70         |
| Insulin Aspart (Novorapid)    | 5 x NovoRapid FlexTouch 100units/ml solution for injection 3ml pre-filled pen (Novo Nordisk Ltd) = £32.13.                                                                                    | e           | 32.13         |
| Insulin Lispro (Humalog)      | 5 x Humalog KwikPen 100units/ml solution for injection 3ml pre-filled pen (Eli Lilly and Company Ltd) = £29.46.                                                                               | e           | 29.46         |
| Actrapid                      | Actrapid 100units/ml for injection 10ml vials (Novo Nordisk Ltd), 100 units per 1ml, net price 10mL vial = £7.48. Novopen devices no longer available so previous price of £26.86 used.       | e           | 34.34         |
| Insulin Detemir (Levemir)     | 5 x Levemir InnotLet 100units/ml solution for injection 3ml pre-filled pen (Novo Nordisk Ltd) = £42                                                                                           | e           | 44.85         |
| Insulin Glargine (Lantus)     | 5 x Lantus 100units/ml solution for injection 3ml pre-filled SoloStar pen (Sanofi) = £37.77                                                                                                   | e           | 37.77         |
| Isophane Insulin (Insulatard) | 5 x Insulatard InnoLet 100units/ml suspension for injection 3ml pre-filled pen (Novo Nordisk Ltd) = £20.40 NHS                                                                                | e           | 20.40         |
| Humalog Mix 25                | Humalog Mix25 KwikPen 100units/ml suspension for injection 3ml pre-filled pen (Eli Lilly and Company Ltd)<br>5 x Insulin lispro 75 unit per 1 ml and Insulin lispro 25 unit per 1 ml = £30.98 | e           | 30.98         |
| Humalog Mix 50                | Humalog Mix50 KwikPen 100units/ml suspension for injection 3ml pre-filled pen (Eli Lilly and Company Ltd)<br>5 x Insulin lispro 50 unit per 1 ml = £30.98                                     | e           | 30.98         |
| Humulin I                     | Humulin I KwikPen 100units/ml suspension for injection 3ml pre-filled pen (Eli Lilly and Company Ltd)<br>5 x Insulin human (as Insulin isophane humane) 100 unit per ml = £21.70              | e           | 21.70         |

Table 5 Unit costs for tests and investigations

| Test and Investigations | Details                                                     | Cost Source | Unit Cost (£) |
|-------------------------|-------------------------------------------------------------|-------------|---------------|
| Blood Gas               |                                                             | f           | 4.86          |
| Thyroid Function        |                                                             | f           | 3.02          |
| Anti TTG                | Anti-tissue Transglutaminase Antibodies test                | f           | 12.35         |
| IgA P                   | Immunoglobulin A test                                       | f           | 4.62          |
| Islet cell Antibodies   | Islet Antigen 2 Antibody                                    | f           | 23.16         |
| GAD Antibodies          | Glutamic Acid Decarboxylase Autoantibodies test (Send away) | f, g        | 22.06         |
| U&E                     | Urea and Electrolytes                                       | f           | 3.92          |
| Chest X ray             |                                                             | i           | 11.00         |
| LFT                     | Liver Function Test                                         | f           | 4.76          |
| FBC                     | Full Blood Count                                            | f           | 4.23          |
| Urine culture           |                                                             | f           | 13.60         |
| Anti tpo                | Thyroid peroxidase IgG Ab                                   | f           | 3.21          |
| APTT                    | Activated Partial Thromboplastin Time test                  | f           | 3.52          |
| C Peptide               |                                                             | f           | 22.50         |
| Coeliac Screen          | IgA Tissue Transglutaminase antibody                        | f           | 12.35         |
| CRP                     | C-Reactive Protein                                          | f           | 3.21          |
| ECG                     | Electrocardiogram                                           | g           | 9.56          |
| Ferritin                |                                                             | f           | 4.71          |
| HBA1C                   |                                                             | f           | 2.42          |
| ICCP                    | Anti-MCV Antibodies                                         | f           | 6.96          |
| Lipid Profile           |                                                             | f           | 3.92          |
| MRSA                    | Methicillin-resistant Staphylococcus aureus test            | f           | 18.52         |
| Pancreatic Cabs         | Anti-GAD                                                    | f           | N/A           |
| Plasma Osmolality       |                                                             | f           | 6.16          |
| Thyroid Antibodies      |                                                             | f           | 3.21          |
| Amylase                 |                                                             | f           | 1.35          |

|                                |                                                                                                                     |      |       |
|--------------------------------|---------------------------------------------------------------------------------------------------------------------|------|-------|
| Anti TPO                       | Anti-thyroid peroxidase test                                                                                        | f    | 3.21  |
| Bilirubin                      | Total                                                                                                               | f    | 1.35  |
| Glucose                        |                                                                                                                     | f    | 1.35  |
| Magnesium                      |                                                                                                                     | f    | 1.35  |
| Others                         | Blood culture                                                                                                       | h    | 7.33  |
|                                | Insulin                                                                                                             | h    | 2.25  |
|                                | Sickle cell                                                                                                         | h    | 8.28  |
|                                | Urine ketones                                                                                                       | h    | 3.21  |
|                                | Viral titres                                                                                                        | h    | 11.59 |
|                                | 3 Hydroxybutyrate                                                                                                   | h    | 3.76  |
|                                | X TRT                                                                                                               | h    | 4.50  |
|                                | Serum Chloride                                                                                                      | h    | 1.44  |
|                                | Lactate                                                                                                             | h    | 1.44  |
|                                | Bone profile                                                                                                        | h    | 5.11  |
|                                | Blood film                                                                                                          | h    | 6.48  |
|                                | Urine dip                                                                                                           | h    | 3.50  |
| Rheumatoid Factor              | h                                                                                                                   | 8.43 |       |
| Blood glucose testing strips   | Based on average cost of strips (£696.96 / 64 = £10.89)                                                             | e    | 10.89 |
| Blood glucose testing cassette | Betacheck C50 cassette: 100 device = £29.98<br>Mobile cassette: 50 device = £9.99 (Assumed 50 strips unless stated) | e    | 9.99  |
| Urine ketone testing strips    | Based on average cost (2.25+3.06/2 = £2.66).                                                                        | e    | 2.66  |
| Blood ketone testing strips    | Based on average cost of ketone testing strips.                                                                     | e    | 16.95 |
| Lancets (pack of 100)          | Based on average cost of pack of 100.                                                                               | j    | 3.93  |
| Lancets (pack of 204)          | FastClix (Roche Diabetes Care Ltd.)                                                                                 | j    | 5.90  |
| Hypostop/glucogel              | GlucoGel 40% gel original (BBI Healthcare Ltd): Glucose 400mg per 1g - 75gram = £7.16                               | e    | 7.16  |
| Glucagon                       | Glucagon hydrochloride 1mg: 1 vial = £11.52                                                                         | e    | 11.52 |
| Insulin needles                | Pack of 100 Safety needles 0.3ml or 0.5ml syringe and needle = £13.34                                               | j    | 13.34 |
| Insulin pens                   | Based on average cost of insulin pens.                                                                              | e    | 19.35 |

|            |                       |   |      |
|------------|-----------------------|---|------|
| Sharps bin | Sharpsafe 1L = £0.85. | j | 0.85 |
|------------|-----------------------|---|------|

## References:

- a) NHS Improvement and NHS England. Annex A: The national tariff workbook. 2020 [Accessed 10/03/2020]. Available from: <https://improvement.nhs.uk/resources/national-tariff/>
- b) Curtis, Lesley A. and Burns, Amanda (2019) Unit Costs of Health and Social Care 2019. Unit Costs of Health and Social Care. PSSRU, Kent, UK, 176 pp. ISBN 978-1-911353-10-2. <https://kar.kent.ac.uk/79286/1/UCFinalFeb20.pdf>
- c) Curtis L. Unit Costs of Health and Social Care 2010. University of Kent, Canterbury: Personal Social Services Research Unit; 2010. [https://www.pssru.ac.uk/pub/uc/uc2010/uc2010\\_s10.pdf](https://www.pssru.ac.uk/pub/uc/uc2010/uc2010_s10.pdf)
- d) Barton, J & Saunders J (2010) Discontinuation of Mixtard® 30 Insulin Products, Aneurin Bevan Health Board (August 2010) [Accessed: 10/03/2020]. Available from: <http://www.wales.nhs.uk/sites3/docopen.cfm?orgid=814&id=161224>
- e) NICE. BNF for Children: British National Formulary. NICE; 2020 [accessed 10/03/2020]. Available from: <https://bnfc.nice.org.uk/>
- f) Cardiff and Vale University Health Board, Biochemistry and Immunology Dept, University Hospital of Wales. (Personal communication).
- g) (Inflated)\* NICE. Appendix M: Routine preoperative tests for elective surgery. Centre NCG; 2015 [accessed 10/03/2020]. Available from: <https://www.nice.org.uk/guidance/ng45/history/>
- h) (Inflated)\* from previous cost supplied by 2012 Cwm Taf Health Board
- i) Personal communication with Swansea Bay Health Board
- j) NHS. NHS Electronic Drug Tariff. NHS Business Services Authority; 2020. <http://www.drugtariff.nhsbsa.nhs.uk/#/00774110-DC/DC00773743#d2e9682/Part%20IXA-Appliances>

\*Costs inflated using the CCEMG-EPPI-Centre Cost Converter. Available at: <http://epi.ioe.ac.uk/costconversion/default.aspx>

**Table 6 Unit costs for patient/carer borne costs**



| Resource item       | Details                                                                                                                                                                          | Cost source | Unit cost (£) |
|---------------------|----------------------------------------------------------------------------------------------------------------------------------------------------------------------------------|-------------|---------------|
| Time off work       | Median weekly earnings £585 April 2019<br>Daily wage (£585 divided by 5 = £117)                                                                                                  | a           | 117.00        |
| Time off school     | Total annual spending per pupil of £5,872; Divided by the number of school days in a year (195) = a cost of £30.11 per day missed                                                | b           | 30.11         |
| Travelling by car   | AA Mileage calculator used to calculate miles travelled in 1 hour = 48.9miles.<br>Average price per mileage = £1.238.<br>Average miles per gallon = 50.5mpg.<br>= £5.44 per hour | c, d, e     | 5.44          |
| Travelling by bus   | Captured by OOP£                                                                                                                                                                 |             |               |
| Travelling by train | Captured by OOP£                                                                                                                                                                 |             |               |
| Travelling by taxi  | Captured by OOP£                                                                                                                                                                 |             |               |

## References:

- a) Office for National Statistics. Employee earnings in the UK. Office for National Statistics –; 2019 [accessed 10/03/2020]. Available from: <https://www.ons.gov.uk/employmentandlabourmarket/peopleinwork/earningsandworkinghours/bulletins/annualsurveyofhoursandearnings/2019>
- b) Belfield, C. F., C. Sibieta, L. 2018. Annual Report on Education Spending in England. In: Payne, J. ed. London: The Institute for Fiscal Studies. (2018-2019 prices).
- c) Automobile Association Developments Ltd. 2018. Mileage calculator. AA. [Accessed: 29/03/2020]. Available at: <https://www.theaa.com/driving/mileage-calculator.jsp>
- d) data.gov.uk. 2020. *Petrol and diesel prices*. Department for Business, Energy and Industrial Strategy. [Accessed: 29/03/2020]. Available at: <https://data.gov.uk/dataset/c174a981-b0f2-4b39-adc0-1d0a27a7d8c9/petrol-and-diesel-prices>
- e) RAC Foundation. 2020. *FAQs about road transport and the environment*. London. [Accessed: 29/03/2020]. Available at: <https://www.racfoundation.org/motoring-faqs/environment>

Table 7 Other Hospital Contacts

| Resource item      | Notes                                                                | Cost data source | Unit cost used (£) |
|--------------------|----------------------------------------------------------------------|------------------|--------------------|
| A&E                | Cost per A&E attendance.<br>Inflated from £160.                      | a                | 166.20             |
| ITU                | Paediatric ICU, basic critical care average cost                     | b                | 1,389.00           |
| HTU                | Paediatric HDU, basic critical care average cost                     | b                | 780.00             |
| Other ward         | PK68C CC Score 0, cost of combined day case/ordinary elective spell. | c                | 894.00             |
| Ambulance call out | See and treat and convey                                             | b                | 258.00             |

**References:**

- a) NHS Improvement. 2017/18 reference costs and guidance. 2018 [accessed 03/05/2020]. Available from: <https://improvement.nhs.uk/resources/reference-costs/>
- b) Curtis LAB, Amanda. Unit Costs of Health and Social Care 2019. Unit Costs of Health and Social Care. Kent, UK: PSSRU; 2019. p. 176.
- c) NHS Improvement and NHS England. Annex A: The national tariff workbook. 2020 [accessed 10/03/2020]. Available from: <https://improvement.nhs.uk/resources/national-tariff/>

**Table 8 Total Costs**

|                                               | Arm                                       |                                               | Difference between Home and Hospital, mean (95% CI) (£) |
|-----------------------------------------------|-------------------------------------------|-----------------------------------------------|---------------------------------------------------------|
|                                               | Home management (n=98), mean (95% CI) (£) | Hospital management (n=95), mean (95% CI) (£) |                                                         |
| <b>Direct Healthcare Costs Days 0-3</b>       | 1163 (1079 to 1248)                       | 3386 (3261 to 3511)                           | -2223 (-2373 to -2072)                                  |
| <b>Direct Healthcare Costs 24months</b>       | 5287 (4864 to 5709)                       | 5282 (4883 to 5680)                           | 5 (-584 to 594)                                         |
| <b>TOTAL Direct Healthcare Costs</b>          | 6450 (6004 to 6897)                       | 8668 (8255 to 9080)                           | -2217 (-2825 to -1609)                                  |
| <b>Patient/carer Costs Days 0-3</b>           | 331 (280 to 383)                          | 352 (292 to 412)                              | -21 (-101 to 59)                                        |
| <b>Patient/carer Costs 24months</b>           | 1420 (1134 to 1705)                       | 1737 (1207 to 2267)                           | -317 (-916 to 281)                                      |
| <b>TOTAL Patient/carer Costs</b>              | 1751 (1448 to 2054)                       | 2089 (1547 to 2631)                           | -338 (-963 to 286)                                      |
| <b>TOTAL Healthcare + Patient/carer Costs</b> | 8201 (7585 to 8817)                       | 10757 (10050 to 11463)                        | -2556 (-3494 to -1618)                                  |

Table 9 DIRECT COSTS (NHS): Initiation Period (Days 0-3)

| Variable                          | Arm        | Observed Coef.(£) | Bootstrap Std. Error.(£) | z (£) | P> z  | Normal-based [95% CI] (£) |          |
|-----------------------------------|------------|-------------------|--------------------------|-------|-------|---------------------------|----------|
| <b>Contact with Diabetes Team</b> | Home       | 974               | 43                       | 23    | 0.000 | 889                       | 1059     |
|                                   | Hospital   | 720               | 32                       | 23    | 0.000 | 658                       | 782      |
|                                   | Difference | 254               | 55                       | 5     | 0.000 | 147                       | 361      |
| <b>Other Health Professionals</b> | Home       | 0                 | 0                        | 1     | 0.322 | -0                        | 0        |
|                                   | Hospital   | 1                 | 1                        | 1     | 0.202 | -1                        | 4        |
|                                   | Difference | -1                | 1                        | -1    | 0.219 | -4                        | 1        |
| <b>Tests and Investigations</b>   | Home       | 55                | 3                        | 18    | 0.000 | 49                        | 61       |
|                                   | Hospital   | 62                | 3                        | 21    | 0.000 | 56                        | 67       |
|                                   | Difference | -7                | 4                        | -2    | 0.103 | -15                       | 1        |
| <b>Hospital Stay</b>              | Home       | 0                 | -                        | -     | -     | -                         | -        |
|                                   | Hospital   | 2583              | 61                       | 43    | 0.000 | 2464                      | 2702     |
|                                   | Difference | -2583             | 61                       | -42   | 0.000 | -2702                     | -2463    |
| <b>Nurse Travel</b>               | Home       | 133               | 13                       | 10    | 0.000 | 107                       | 159      |
|                                   | Hospital   | 18                | 5                        | 3     | 0.001 | 8                         | 28       |
|                                   | Difference | 115               | 14                       | 8     | 0.000 | 86                        | 143      |
| <b>Dietician Travel</b>           | Home       | 3                 | 1                        | 3     | 0.001 | 1                         | 5        |
|                                   | Hospital   | 1                 | 1                        | 1     | 0.314 | -1                        | 2        |
|                                   | Difference | 2                 | 1                        | 2     | 0.038 | 0                         | 4.655081 |
| <b>Total Cost Days 0-3</b>        | Home       | 1163              | 43                       | 27    | 0.000 | 1079                      | 1248     |
|                                   | Hospital   | 3386              | 64                       | 53    | 0.000 | 3261                      | 3511     |
|                                   | Difference | -2223             | 77                       | -29   | 0.000 | -2373                     | -2072    |

Table 10: DIRECT COSTS (NHS): Follow-up period (24months)

| Variable                                  | Arm        | Observed Coef.(£) | Bootstrap Std. Error.(£) | z (£) | P> z   | Normal-based [95% CI] (£) |      |
|-------------------------------------------|------------|-------------------|--------------------------|-------|--------|---------------------------|------|
| <b>Equipment</b>                          | Home       | 1745              | 91                       | 19    | 0.000  | 1567                      | 1924 |
|                                           | Hospital   | 1714              | 87                       | 20    | 0.000  | 1544                      | 1883 |
|                                           | Difference | 31                | 127                      | 0     | 0.805  | -218                      | 281  |
| <b>Insulin</b>                            | Home       | 457               | 28                       | 16    | 0.000  | 402                       | 512  |
|                                           | Hospital   | 446               | 25                       | 18    | 0.000  | 397                       | 495  |
|                                           | Difference | 11                | 38                       | 0     | 0.770  | -63                       | 85   |
| <b>Tests and Investigations</b>           | Home       | 8                 | 1                        | 6     | 0.000  | 5                         | 11   |
|                                           | Hospital   | 8                 | 1                        | 6     | 0.000  | 6                         | 11   |
|                                           | Difference | -1                | 2                        | -0    | 0.968  | -4                        | 4    |
| <b>Contact with Diabetes Team (Other)</b> | Home       | 584               | 42                       | 14    | 0.000  | 502                       | 667  |
|                                           | Hospital   | 625               | 43                       | 15    | 0.000  | 541                       | 709  |
|                                           | Difference | -41               | 61                       | -1    | 0.503  | -160                      | 79   |
| <b>Outpatient contacts</b>                | Home       | 1400              | 28                       | 49    | 0.000  | 1344                      | 1455 |
|                                           | Hospital   | 1392              | 26                       | 54    | 0.000  | 1341                      | 1443 |
|                                           | Difference | 8                 | 38                       | 0     | 0.837  | -67                       | 83   |
| <b>Other health professional visits</b>   | Home       | 195               | 23                       | 8     | 0.000  | 149                       | 241  |
|                                           | Hospital   | 236               | 30                       | 8     | 0.000  | 177                       | 295  |
|                                           | Difference | -41               | 38                       | -1    | -0.276 | -115                      | 33   |
| <b>Hospital contacts</b>                  | Home       | 897               | 167                      | 5     | 0.000  | 569                       | 1225 |
|                                           | Hospital   | 860               | 157                      | 5     | 0.000  | 553                       | 1167 |
|                                           | Difference | 37                | 230                      | 0     | 0.872  | -413                      | 487  |
| <b>Contact with diabetes team</b>         | Home       | 1984              | 55                       | 36    | 0.000  | 1876                      | 2092 |
|                                           | Hospital   | 2017              | 52                       | 39    | 0.000  | 1915                      | 2119 |
|                                           | Difference | -33               | 76                       | -0    | 0.666  | -182                      | 116  |
| <b>Total Cost of Follow-up</b>            | Home       | 5288              | 216                      | 25    | 0.000  | 4864                      | 5709 |
|                                           | Hospital   | 5282              | 203                      | 26    | 0.000  | 4883                      | 5680 |
|                                           | Difference | 5                 | 300                      | 0     | 0.986  | -584                      | 594  |

Table 11: INDIRECT COSTS (patient/carer): Initiation period (days 0-3)

| Variable               | Arm        | Observed Coef.(£) | Bootstrap Std. Error.(£) | z (£) | P> z  | Normal-based [95% CI] (£) |     |
|------------------------|------------|-------------------|--------------------------|-------|-------|---------------------------|-----|
| Days off work          | Home       | 250               | 24                       | 10    | 0.000 | 203                       | 297 |
|                        | Hospital   | 256               | 28                       | 9     | 0.000 | 201                       | 310 |
|                        | Difference | -5                | 37                       | -0    | 0.885 | -77                       | 66  |
| Travel                 | Home       | 11                | 1                        | 14    | 0.000 | 9                         | 12  |
|                        | Hospital   | 18                | 1                        | 13    | 0.000 | 15                        | 21  |
|                        | Difference | -8                | 2                        | -5    | 0.000 | -11                       | -4  |
| Out of pocket expenses | Home       | 8                 | 1                        | 10    | 0.000 | 7                         | 10  |
|                        | Hospital   | 22                | 3                        | 8     | 0.000 | 17                        | 27  |
|                        | Difference | -14               | 3                        | -5    | 0.000 | -19                       | -8  |
| Days off school        | Home       | 65                | 5                        | 14    | 0.000 | 56                        | 75  |
|                        | Hospital   | 57                | 5                        | 11    | 0.000 | 47                        | 67  |
|                        | Difference | 8                 | 7                        | 1     | 0.230 | -5                        | 22  |
| Total Cost Days 0-3    | Home       | 331               | 26                       | 13    | 0.000 | 280                       | 383 |
|                        | Hospital   | 352               | 31                       | 11    | 0.000 | 292                       | 412 |
|                        | Difference | -21               | 41                       | -1    | 0.607 | -101                      | 59  |

Table 12: INDIRECT COSTS (patient/carer): Follow-up period (24months)

| Variable                 | Arm        | Observed Coef.(£) | Bootstrap Std. Error.(£) | z (£) | P> z  | Normal-based [95% CI] (£) |      |
|--------------------------|------------|-------------------|--------------------------|-------|-------|---------------------------|------|
| Days off work            | Home       | 869               | 132                      | 7     | 0.000 | 609                       | 1128 |
|                          | Hospital   | 1180              | 256                      | 5     | 0.000 | 679                       | 1681 |
|                          | Difference | -312              | 285                      | -1    | 0.274 | -871                      | 247  |
| Travel                   | Home       | 63                | 4                        | 17    | 0.000 | 56                        | 71   |
|                          | Hospital   | 61                | 6                        | 10    | 0.000 | 49                        | 72   |
|                          | Difference | 3                 | 7                        | 0     | 0.692 | -11                       | 17   |
| Out of pocket expenses   | Home       | 44                | 6                        | 7     | 0.000 | 32                        | 56   |
|                          | Hospital   | 42                | 6                        | 7     | 0.000 | 30                        | 54   |
|                          | Difference | 2                 | 9                        | 0     | 0.782 | -15                       | 20   |
| Days off school          | Home       | 443               | 41                       | 11    | 0.000 | 363                       | 523  |
|                          | Hospital   | 454               | 54                       | 8     | 0.000 | 349                       | 559  |
|                          | Difference | -11               | 68                       | -0    | 0.873 | -143                      | 122  |
| Total Costs of Follow-up | Home       | 1420              | 146                      | 10    | 0.000 | 1134                      | 1705 |
|                          | Hospital   | 1737              | 270                      | 6     | 0.000 | 1207                      | 2267 |
|                          | Difference | -317              | 305                      | -1    | 0.299 | -916                      | 281  |

Table 13: Total Costs

| Variable                         | Arm        | Observed Coef.(£) | Bootstrap Std. Error.(£) | z (£) | P> z  | Normal-based [95% CI] (£) |       |
|----------------------------------|------------|-------------------|--------------------------|-------|-------|---------------------------|-------|
| Patient/carer Total Cost         | Home       | 1751              | 155                      | 11    | 0.000 | 1448                      | 2054  |
|                                  | Hospital   | 2089              | 277                      | 8     | 0.000 | 1547                      | 2631  |
|                                  | Difference | -338              | 319                      | -1    | 0.288 | -963                      | 286   |
| Direct Healthcare Total Cost     | Home       | 6450              | 228                      | 28    | 0.000 | 6004                      | 6897  |
|                                  | Hospital   | 8868              | 210                      | 41    | 0.000 | 8255                      | 9080  |
|                                  | Difference | -2217             | 310                      | -7    | 0.000 | -2825                     | -1609 |
| Total Healthcare + Patient/carer | Home       | 8201              | 314                      | 26    | 0.000 | 7585                      | 8817  |
|                                  | Hospital   | 10757             | 360                      | 30    | 0.000 | 10050                     | 11463 |
|                                  | Difference | -2556             | 479                      | -5    | 0.000 | -3494                     | -1618 |

Table 14 Cost Consequences Analysis (CCA)

| Costs and Consequences                   | Arm |                                       |    |                                           | Difference between Home and Hospital, mean (95% CI) (£) | P value |
|------------------------------------------|-----|---------------------------------------|----|-------------------------------------------|---------------------------------------------------------|---------|
|                                          | N   | Home management, mean (95% CI/SD) (£) | N  | Hospital management, mean (95% CI/SD) (£) |                                                         |         |
| <b>Costs Impact</b>                      |     |                                       |    |                                           |                                                         |         |
| <b>TOTAL Direct Healthcare Costs</b>     | 98  | £6450<br>(£6004 to £6897)             | 95 | £8668<br>(£8255 to £9080)                 | -£2217<br>(-£2825 to -£1609)                            | <0.05   |
| <b>TOTAL Patient/Carer Costs</b>         | 98  | £1751<br>(£1448 to £2054)             | 95 | £2089<br>(£1547 to £2631)                 | -£338<br>(-£963 to £286)                                | 0.288   |
| <b>TOTAL NHS + Patient/Carer Costs</b>   | 98  | £8201<br>(£7585 to £8817)             | 95 | £10757<br>(£10050 to 11463)               | -£2556<br>(-£3494 to -£1618)                            | <0.05   |
| <b>Health Impact</b>                     |     |                                       |    |                                           |                                                         |         |
| <b>HbA1c 24months (mmol/mol)*</b>        | 98  | 72.1 (SD = 21.7)                      | 95 | 72.6 (SD = 21.9)                          | 1.01<br>(0.93 to 1.09)                                  | 0.863   |
| <b>Physical Impact</b>                   |     |                                       |    |                                           |                                                         |         |
| <b>Physical well-being at 1month**</b>   | 68  | 63.0 (SD = 20.38)                     | 62 | 70.4 (SD = 19.07)                         | -7.5<br>(-14.3 to -0.6)                                 | 0.033   |
| <b>Physical well-being at 24months**</b> | 62  | 70.0 (SD = 17.64)                     | 58 | 71.0 (SD = 15.90)                         | -1.0<br>(-7.1 to 5.1)                                   | 0.741   |
| <b>Symptoms at 1 month***</b>            | 69  | 60.2 (SD = 14.23)                     | 62 | 62.3 (SD = 13.09)                         | -2.1<br>(-6.8 to 2.6)                                   | 0.384   |
| <b>Symptoms at 24months***</b>           | 62  | 62.0 (SD = 12.56)                     | 58 | 63.3 (SD = 14.11)                         | -1.2<br>(-5.9 to 3.6)                                   | 0.633   |
| <b>Psychological Impact</b>              |     |                                       |    |                                           |                                                         |         |
| <b>Worry at 1month***</b>                | 68  | 72.7 (SD = 24.26)                     | 63 | 74.7 (SD = 22.94)                         | -2.1<br>(-10.2 to 6.1)                                  | 0.616   |

|                                   |    |                   |    |                   |                          |       |
|-----------------------------------|----|-------------------|----|-------------------|--------------------------|-------|
| Worry at 24months***              | 62 | 73.3 (SD = 20.75) | 58 | 71.1 (SD = 23.74) | 2.1<br>(-5.9 to 10.2)    | 0.601 |
| Emotional wellbeing at 1month**   | 68 | 75.5 (SD = 17.98) | 61 | 77.6 (SD = 15.31) | -2.2<br>(-8.0 to 3.7)    | 0.464 |
| Emotional wellbeing at 24months** | 62 | 76.6 (SD = 18.18) | 58 | 78.6 (SD = 12.35) | -2.0<br>(-7.7 to 3.6)    | 0.482 |
| Self-esteem at 1month**           | 68 | 53.9 (SD = 24.19) | 61 | 64.1 (SD = 21.22) | -10.4<br>(-18.3 to -2.4) | 0.011 |
| Self-esteem at 24months**         | 62 | 63.4 (SD = 19.92) | 58 | 56.1 (SD = 18.71) | 7.2<br>(0.2 to 14.2)     | 0.043 |
| <b>Social Impact</b>              |    |                   |    |                   |                          |       |
| Communication at 1month***        | 68 | 72.9 (SD = 28.01) | 63 | 81.3 (SD = 18.25) | -8.4<br>(-16.7 to -0.2)  | 0.045 |
| Communication at 24months***      | 62 | 72.8 (SD = 25.83) | 58 | 78.2 (SD = 21.22) | -5.5<br>(-14.0 to 3.0)   | 0.200 |
| Family at 1month**                | 69 | 76.0 (SD = 17.61) | 61 | 79.7 (SD = 18.10) | -3.7<br>(-9.9 to 2.5)    | 0.242 |
| Family at 24months**              | 61 | 79.3 (SD = 17.81) | 58 | 77.9 (SD = 19.15) | 1.5<br>(-5.1 to 8.2)     | 0.507 |
| Friends at 1month**               | 69 | 79.3 (SD = 14.62) | 60 | 78.6 (SD = 16.33) | 0.5<br>(-4.8 to 5.9)     | 0.849 |
| Friends at 24months**             | 60 | 79.5 (SD = 17.03) | 58 | 77.4 (SD = 16.81) | 2.1<br>(-4.1 to 8.2)     | 0.507 |
| School at 1month**                | 65 | 67.0 (SD = 21.92) | 60 | 68.1 (SD = 18.65) | -1.1<br>(-8.3 to 6.1)    | 0.763 |
| School at 24months**              | 60 | 65.9 (SD = 17.32) | 57 | 61.5 (SD = 18.14) | 4.6<br>(-1.9 to 11.0)    | 0.163 |

\*Controlled for HbA1c at baseline. \*\*KINDL-R – parent answers about child; higher score is better. \*\*\*PedsQL 3.0 Diabetes Module – parent answers about child.
