# Supplementary figures and images for: Cost-effectiveness of home versus hospital management of children at onset of type 1 diabetes: the DECIDE randomised controlled trial
Source: PubMed Central journal article supplement — BMJ Open. 2021 May 19;11(5):e043523. doi: 10.1136/bmjopen-2020-043523 (PMC8137197; doi:10.1136/bmjopen-2020-043523), 2021-05-19

(a)

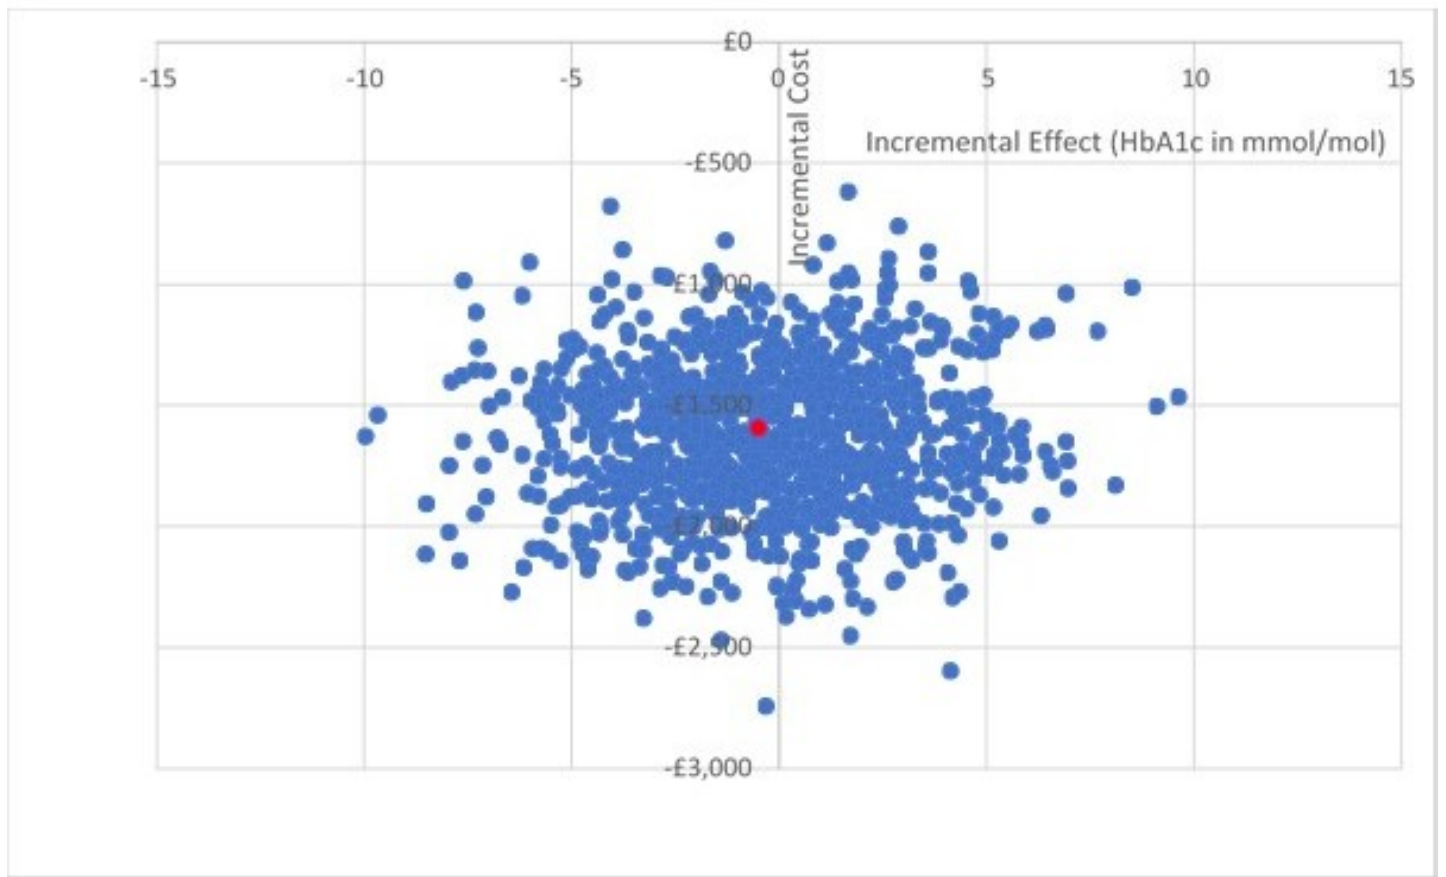

Supplement: bmjopen-2020-043523supp002.pdf [file bmjopen-2020-043523supp002.pdf]

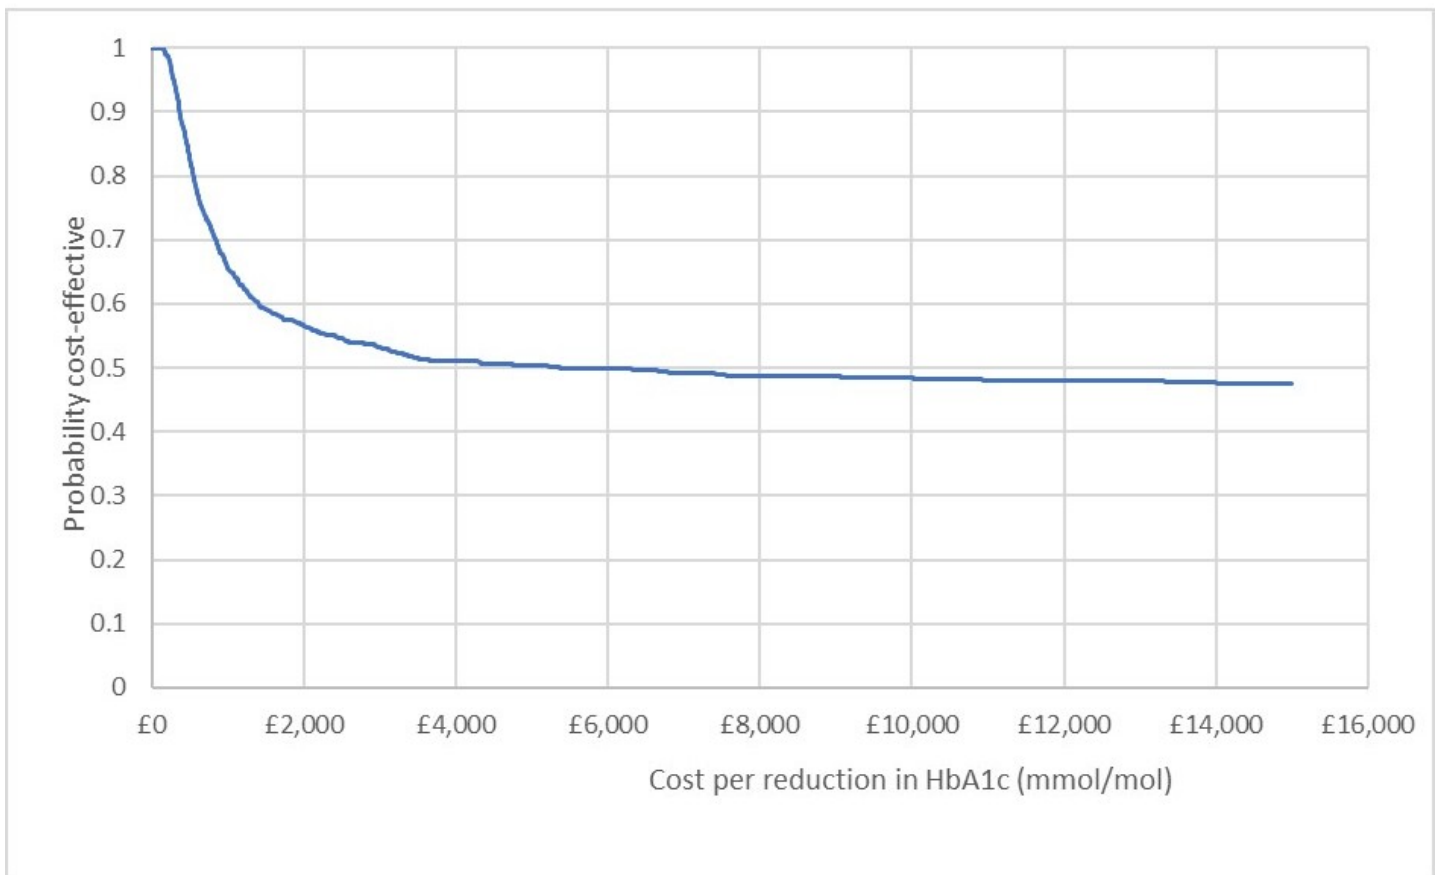

Supplement: bmjopen-2020-043523supp003.pdf [file bmjopen-2020-043523supp003.pdf]

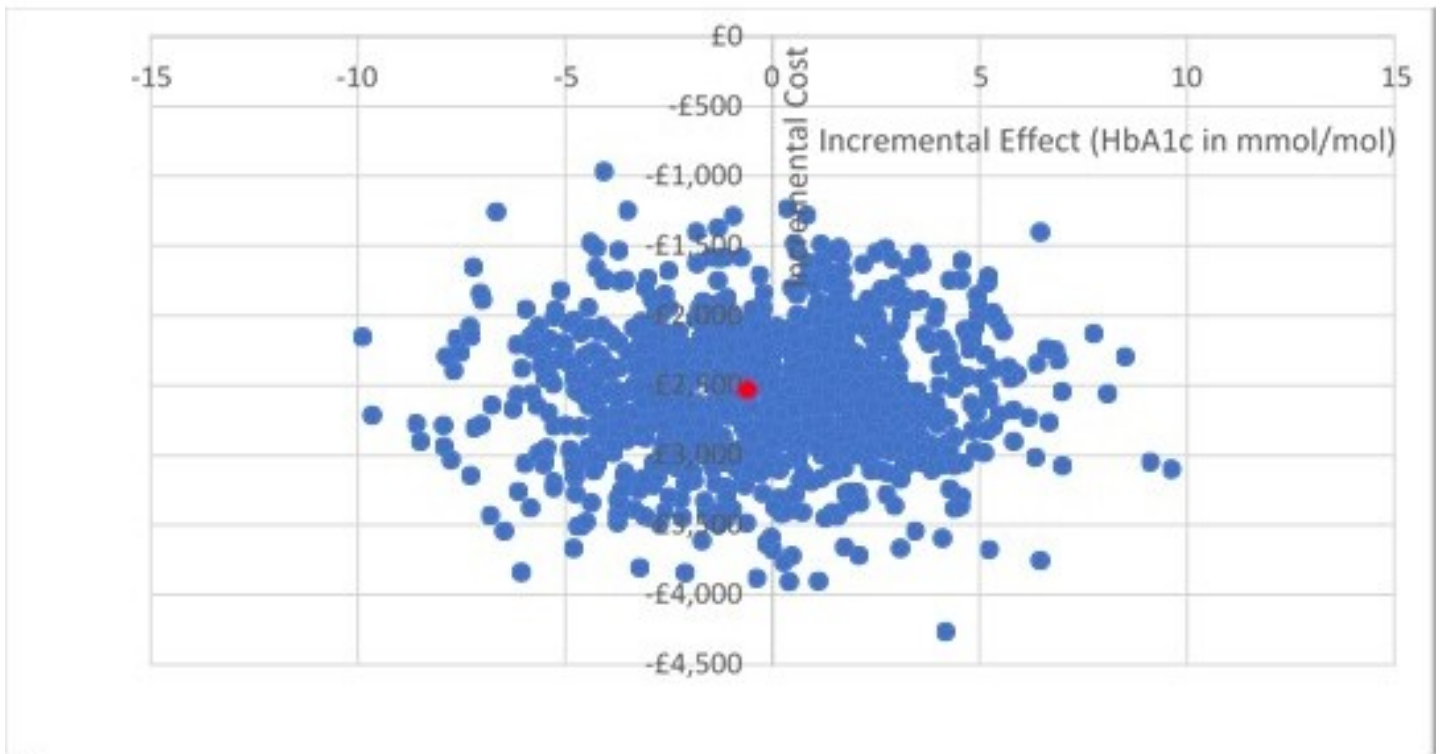

(b)

Supplement: bmjopen-2020-043523supp004.pdf [file bmjopen-2020-043523supp004.pdf]

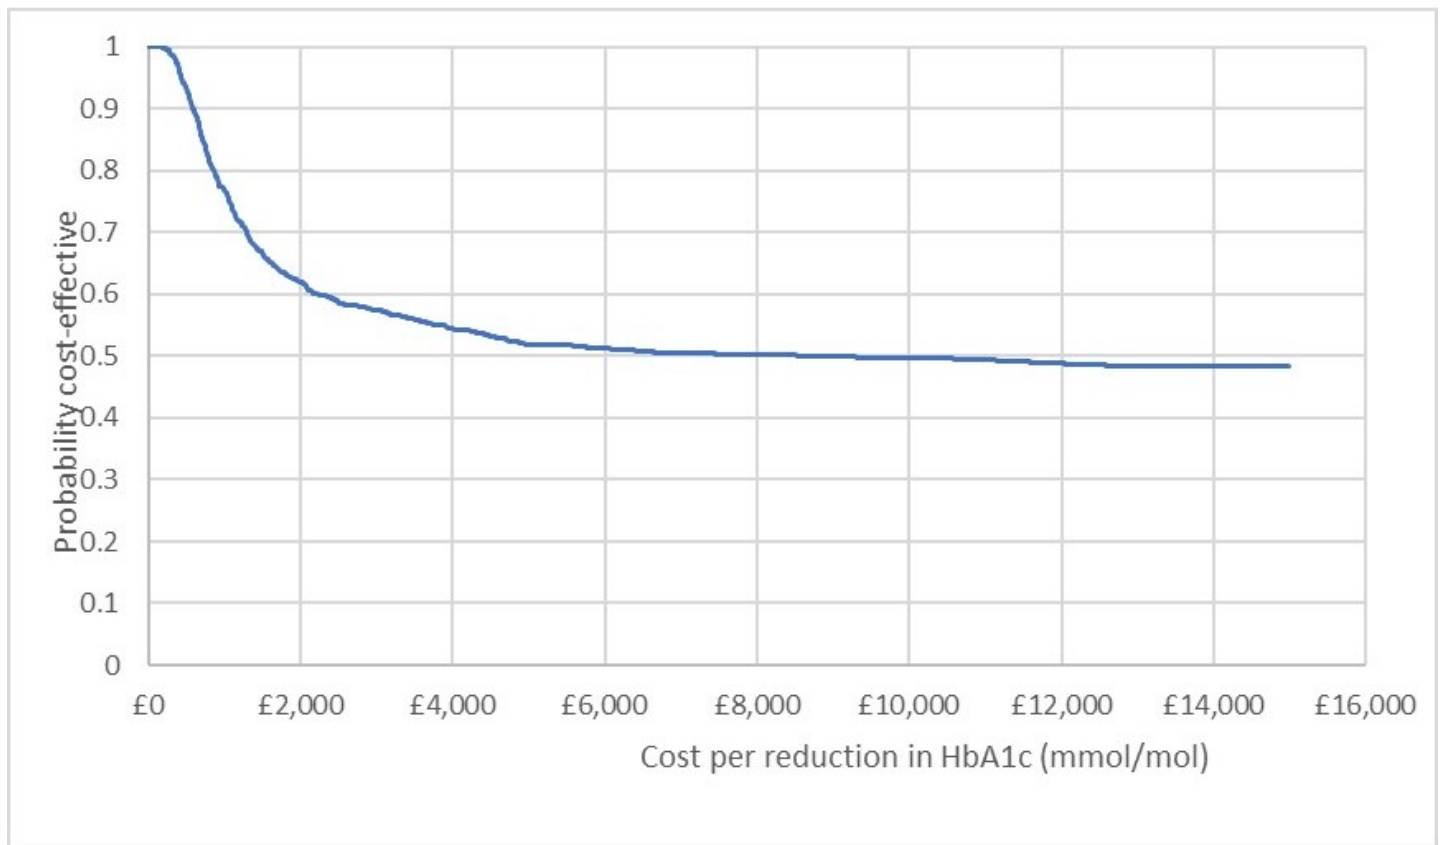

Supplement: bmjopen-2020-043523supp005.pdf [file bmjopen-2020-043523supp005.pdf]
